# Supplementary material for: Scandium bis(trimethylsilyl)methyl complexes revisited: extending the45Sc NMR chemical shift range and a new structural motif of Li[CH(SiMe3)2]
Source: Royal Society of Chemistry journal article supplement (doi:10.1039/d0dt01247e), 2020-01-01
Supplement: d0dt01247e1.pdf [file d0dt01247e1.pdf]

## **Supporting Information**

### **Scandium bis(trimethylsilyl)methyl complexes revisited: extending the $^{45}\text{Sc}$ NMR chemical shift range and a new structural motif of $\text{Li}[\text{CH}(\text{SiMe}_3)_2]$**

Alexandros Mortis, Damir Barisic, Klaus Eichele, Cécilia Maichle-Mössmer, and Reiner Anwander\*

Institut für Anorganische Chemie, Eberhard Karls Universität Tübingen, Auf der Morgenstelle 18, 72076 Tübingen, Germany

\*E-mail for R. A.: [reiner.anwander@uni-tuebingen.de](mailto:reiner.anwander@uni-tuebingen.de)

# Table of Contents

|                       |     |
|-----------------------|-----|
| NMR Spectroscopy      | S3  |
| X-Ray Crystallography | S37 |

## NMR Spectra

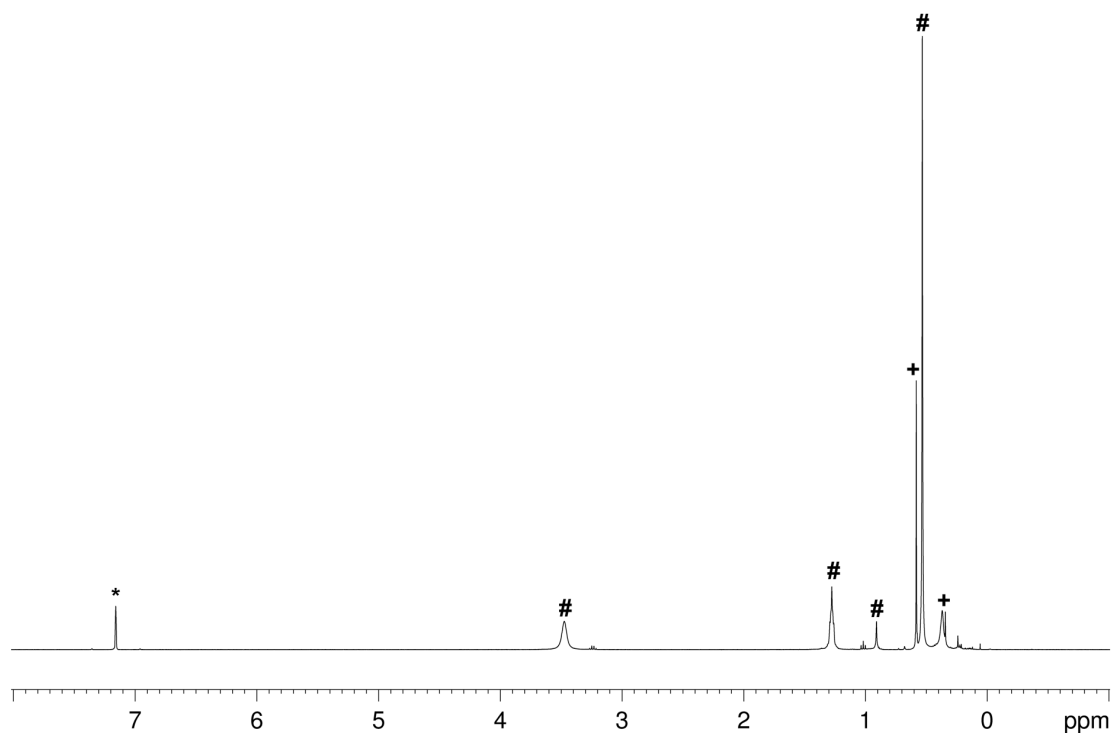

**Figure S1.**  $^1\text{H}$  NMR spectrum (400 MHz) of the reaction of  $\text{ScCl}_3(\text{thf})_3$  with 3 equiv. of  $\text{Li}[\text{CH}(\text{SiMe}_3)_2]$  in  $\text{C}_6\text{D}_6$  at 26 °C. # for **1**. + for complex **2-Sc** as the side product of the reaction. The solvent residual signal is marked with an asterisk.

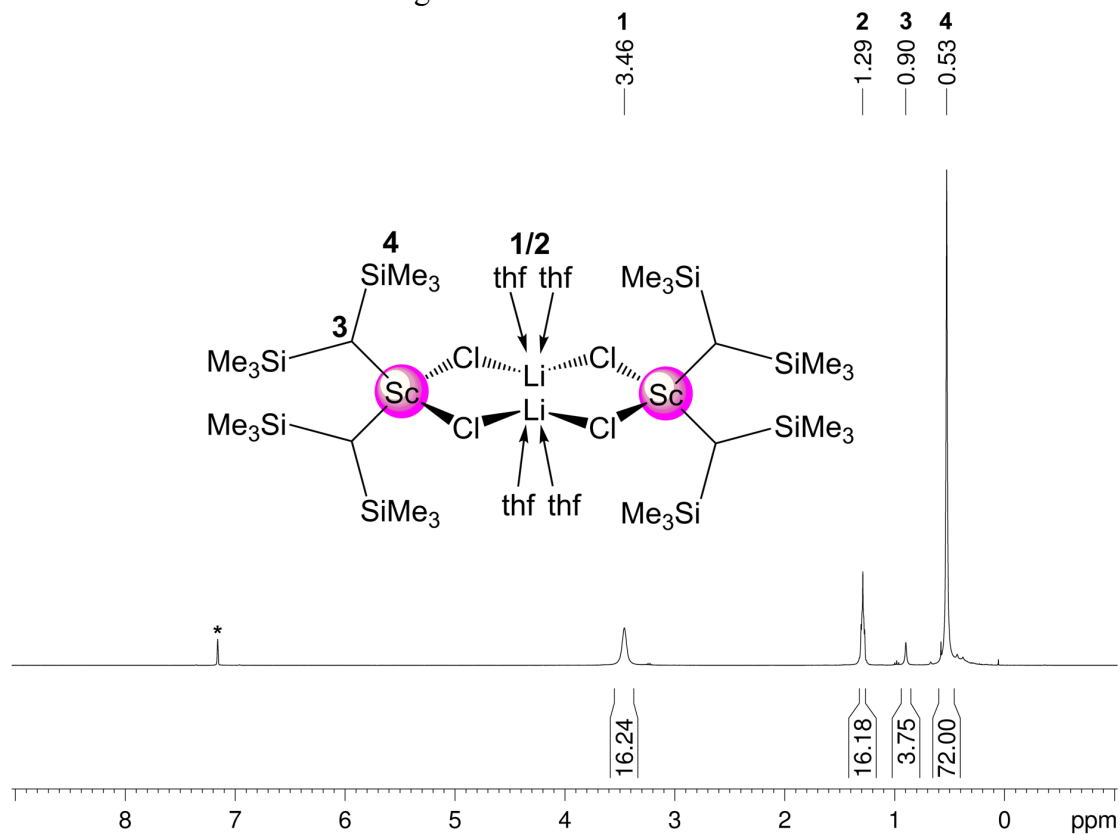

**Figure S2.**  $^1\text{H}$  NMR spectrum (400 MHz) of  $[\text{Sc}\{\text{CH}(\text{SiMe}_3)_2\}_2(\mu\text{-Cl})_2\text{Li}(\text{thf})_2]_2$  (**1**) in  $\text{C}_6\text{D}_6$  at 26 °C. The solvent residual signal is marked with an asterisk.

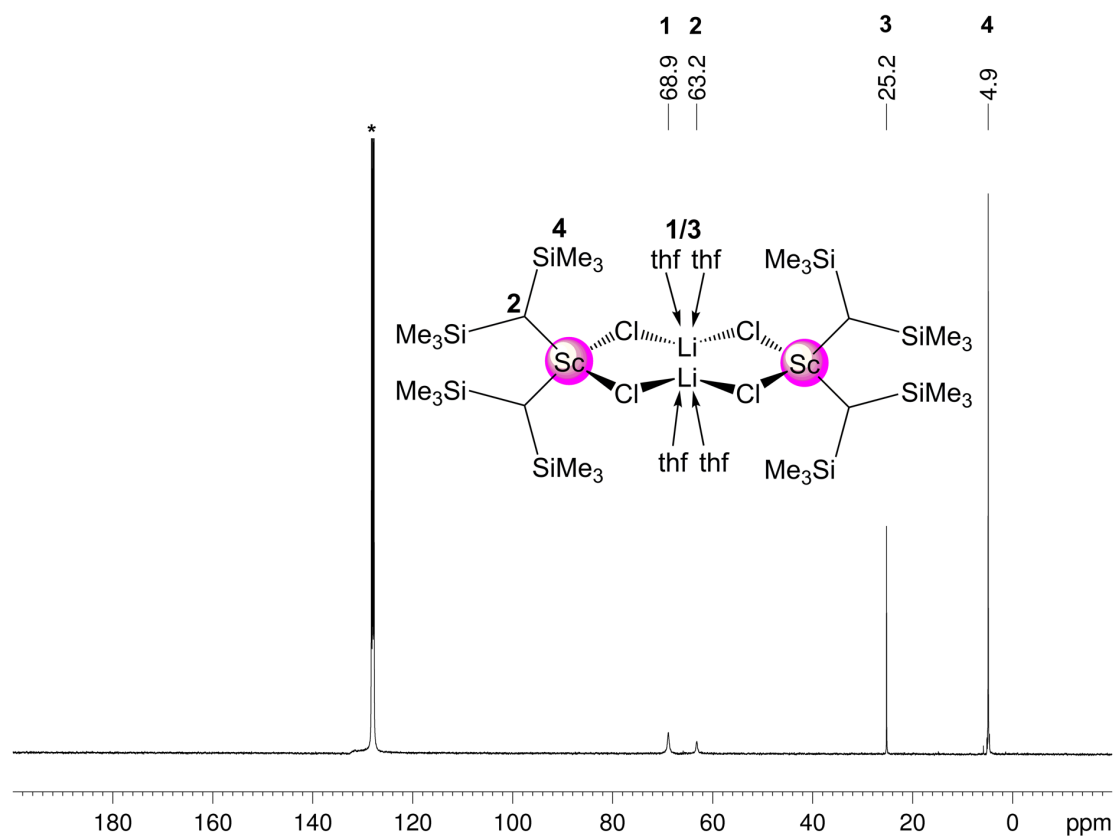

**Figure S3.**  $^{13}\text{C}\{^1\text{H}\}$  NMR spectrum (101 MHz) of  $[\text{Sc}\{\text{CH}(\text{SiMe}_3)_2\}_2(\mu\text{-Cl})_2\text{Li}(\text{thf})_2]_2$  (**1**) in  $\text{C}_6\text{D}_6$  at 26 °C. The solvent residual signal is marked with an asterisk.

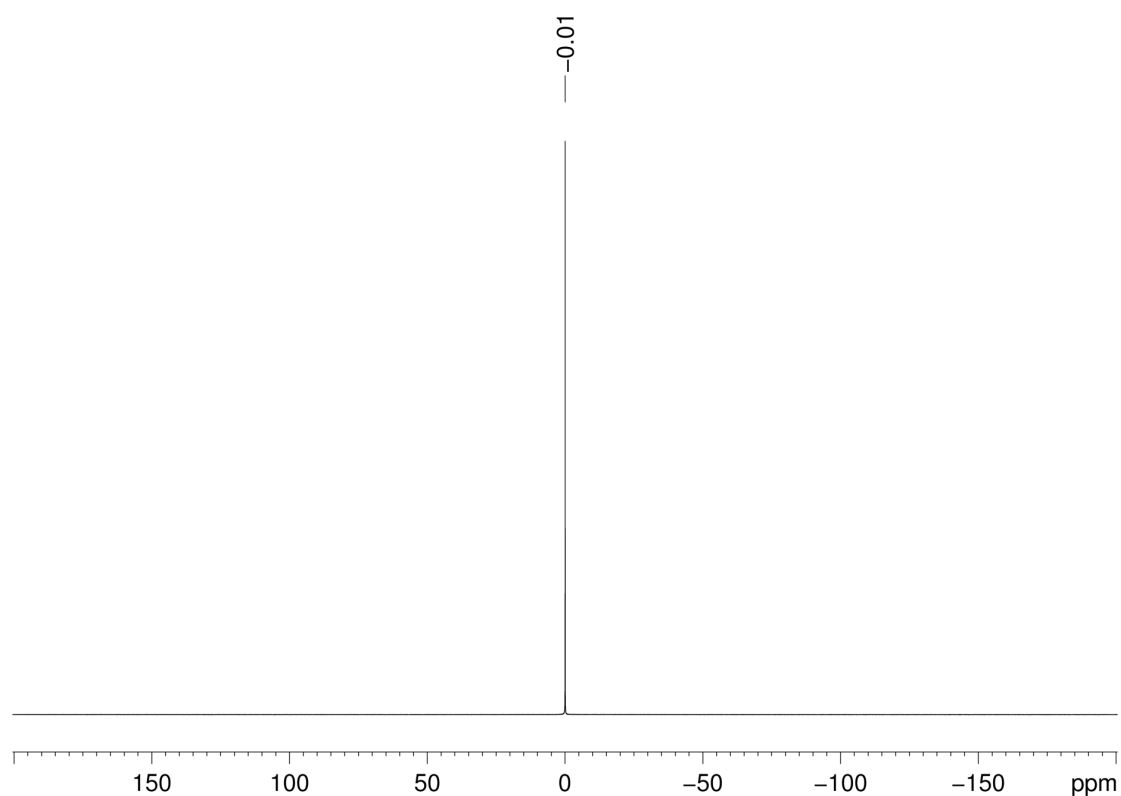

**Figure S4.**  $^7\text{Li}$  NMR spectrum (97 MHz) of  $[\text{Sc}\{\text{CH}(\text{SiMe}_3)_2\}_2(\mu\text{-Cl})_2\text{Li}(\text{thf})_2]_2$  (**1**) in  $\text{C}_6\text{D}_6$  at 26 °C.

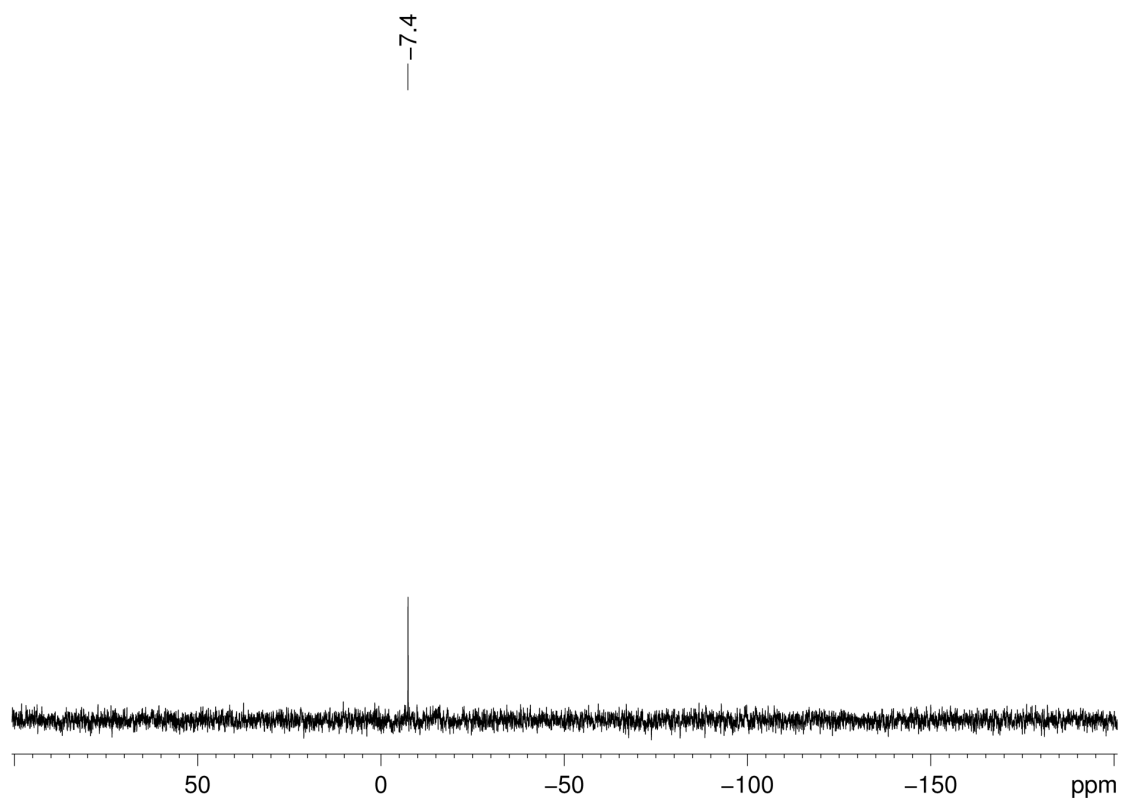

**Figure S5.**  $^{29}\text{Si}$  INEPT NMR spectrum (50 MHz) of  $[\text{Sc}\{\text{CH}(\text{SiMe}_3)_2\}_2(\mu\text{-Cl})_2\text{Li}(\text{thf})_2]_2$  (**1**) in  $\text{C}_6\text{D}_6$  at 26 °C.

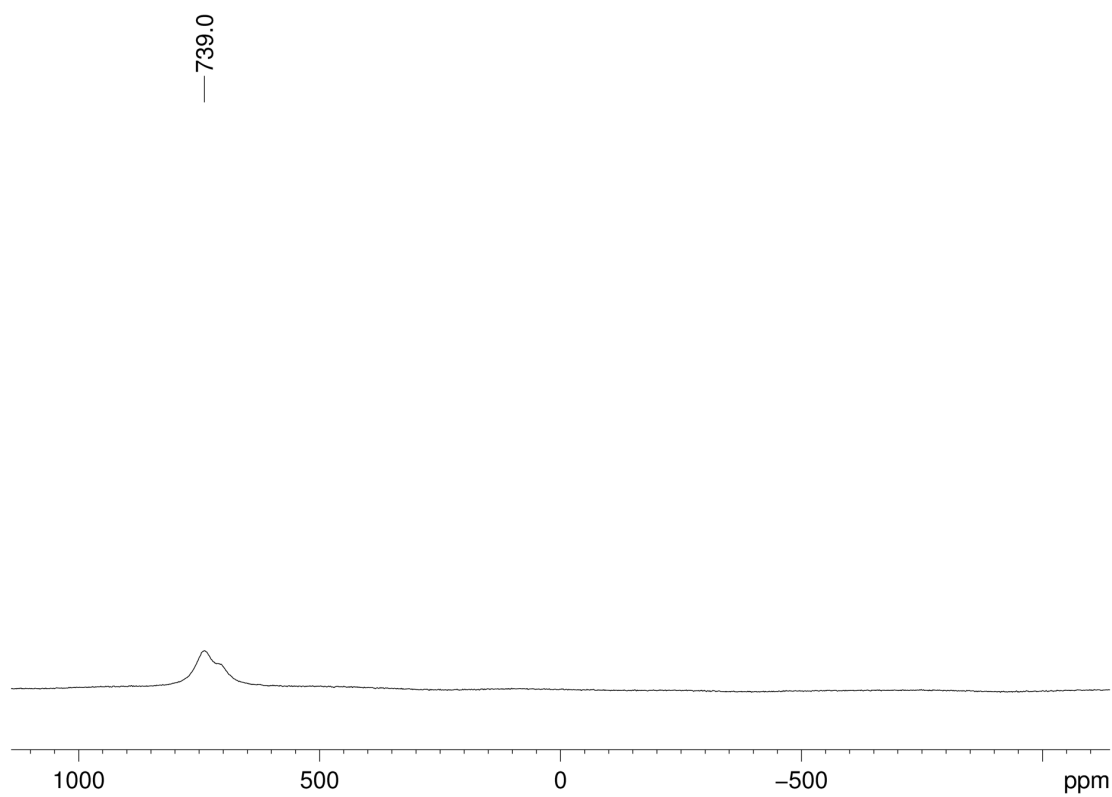

**Figure S6.**  $^{45}\text{Sc}$  NMR spectrum (122 MHz) of  $[\text{Sc}\{\text{CH}(\text{SiMe}_3)_2\}_2(\mu\text{-Cl})_2\text{Li}(\text{thf})_2]_2$  (**1**) in  $\text{C}_6\text{D}_6$  at 26 °C. The shape of the signal is attributed to partial loss of donor solvent (cf. Figure S7).

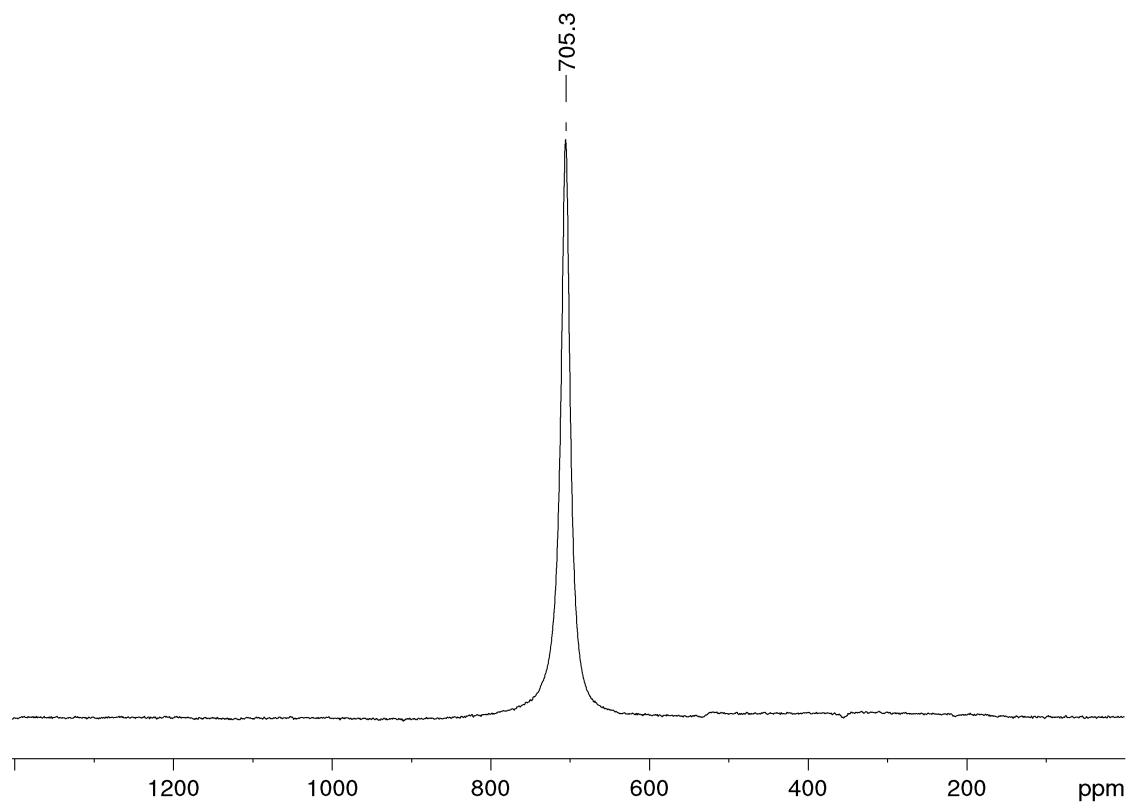

**Figure S7.**  $^{45}\text{Sc}$  NMR spectrum (122 MHz) of  $[\text{Sc}\{\text{CH}(\text{SiMe}_3)_2\}_2(\mu\text{-Cl})_2\text{Li}(\text{thf})_2]_2$  (**1**) in  $[\text{D}_8]\text{THF}$  at 26 °C.

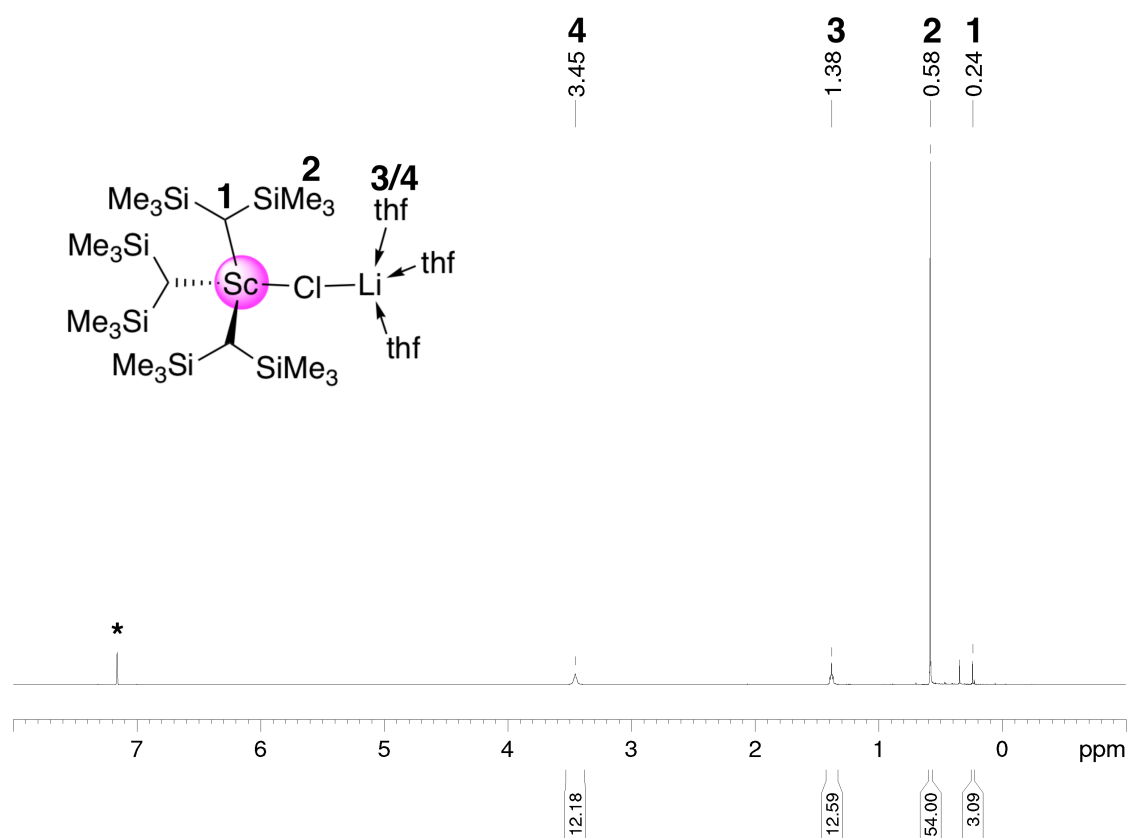

**Figure S8.**  $^1\text{H}$  NMR spectrum (500 MHz) of  $\text{Sc}[\text{CH}(\text{SiMe}_3)_2]_3(\mu\text{-Cl})\text{Li}(\text{thf})_3$  (**2-Sc**) in  $\text{C}_6\text{D}_6$  at 26 °C. The solvent residual signal is marked with an asterisk.

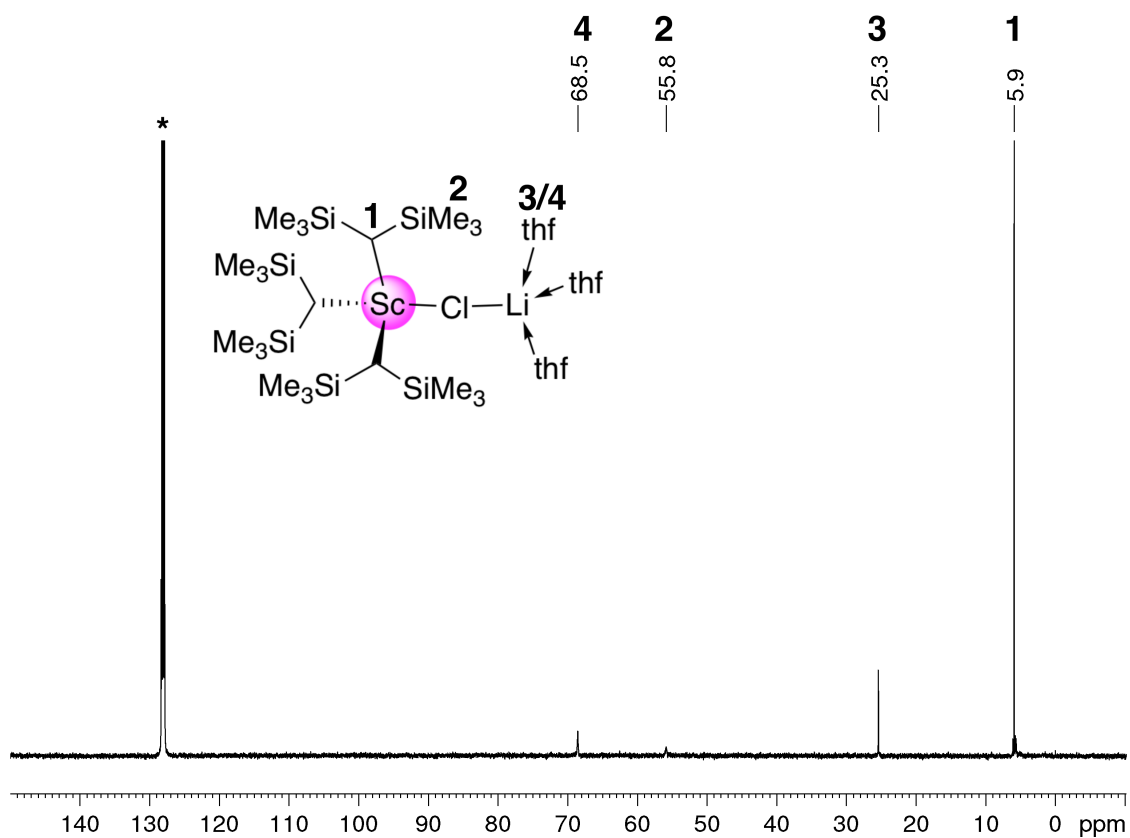

**Figure S9.**  $^{13}\text{C}\{^1\text{H}\}$  NMR spectrum (126 MHz) of  $\text{Sc}[\text{CH}(\text{SiMe}_3)_2]_3(\mu\text{-Cl})\text{Li}(\text{thf})_3$  (2-Sc) in  $\text{C}_6\text{D}_6$  at 26 °C. The solvent residual signal is marked with an asterisk.

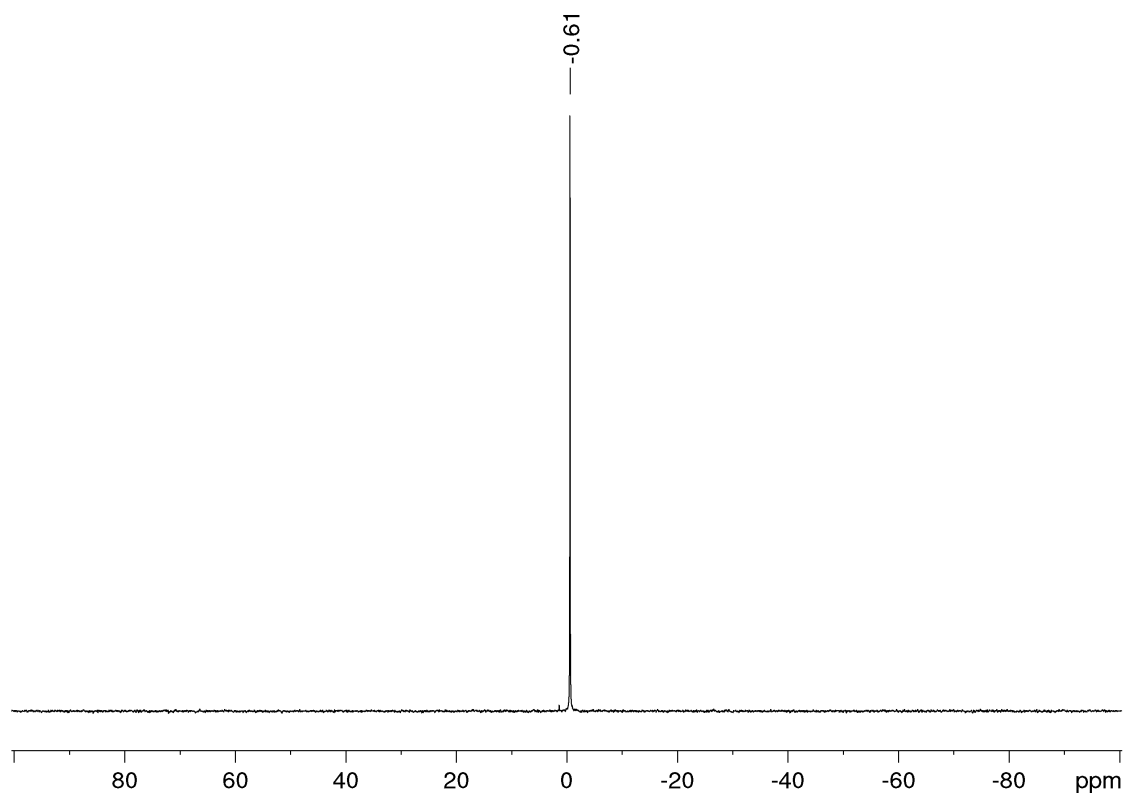

**Figure S10.**  $^7\text{Li}\{^1\text{H}\}$  NMR spectrum (194 MHz) of  $\text{Sc}[\text{CH}(\text{SiMe}_3)_2]_3(\mu\text{-Cl})\text{Li}(\text{thf})_3$  (2-Sc) in  $\text{C}_6\text{D}_6$  at 26 °C.

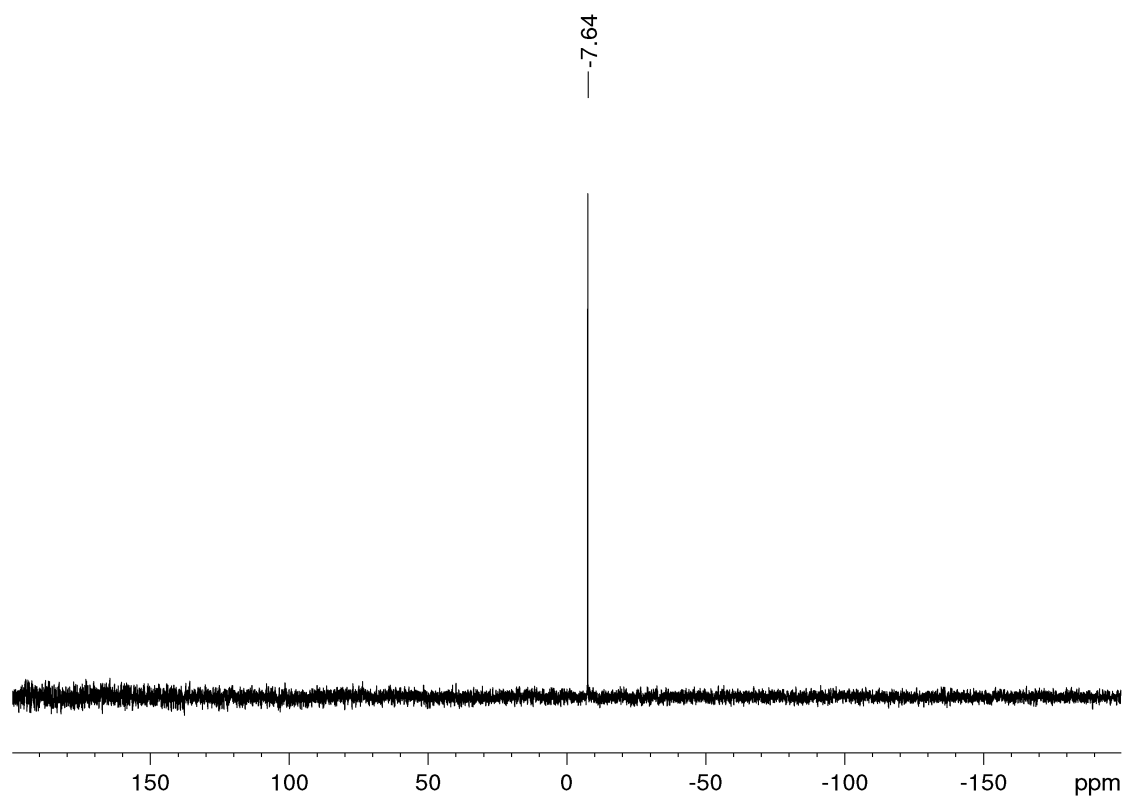

**Figure S11.**  $^{29}\text{Si}$  INEPT NMR spectrum (99 MHz) of  $\text{Sc}[\text{CH}(\text{SiMe}_3)_2]_3(\mu\text{-Cl})\text{Li}(\text{thf})_3$  (**2-Sc**) in  $\text{C}_6\text{D}_6$  at 26 °C.

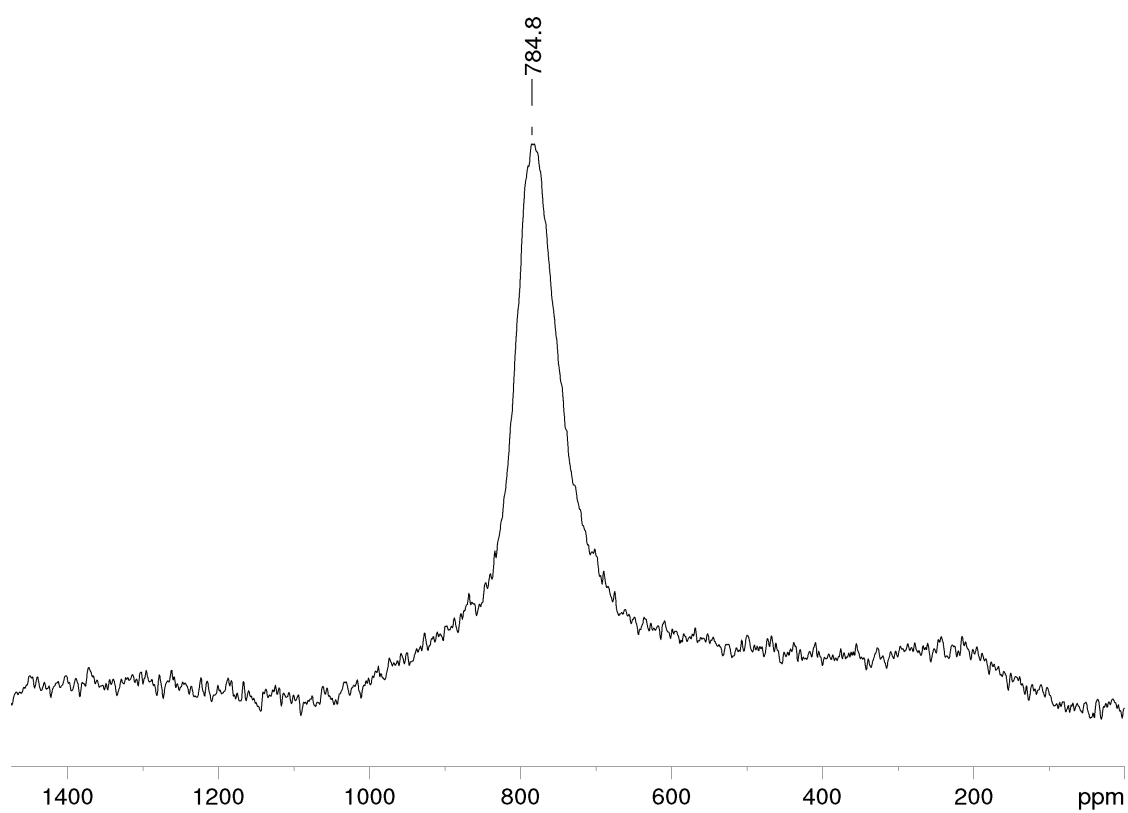

**Figure S12.**  $^{45}\text{Sc}$  NMR spectrum (122 MHz) of  $[\text{Sc}[\text{CH}(\text{SiMe}_3)_2]_3(\mu\text{-Cl})\text{Li}(\text{thf})_3]$  (**2-Sc**) in  $\text{C}_6\text{D}_6$  at 26 °C.

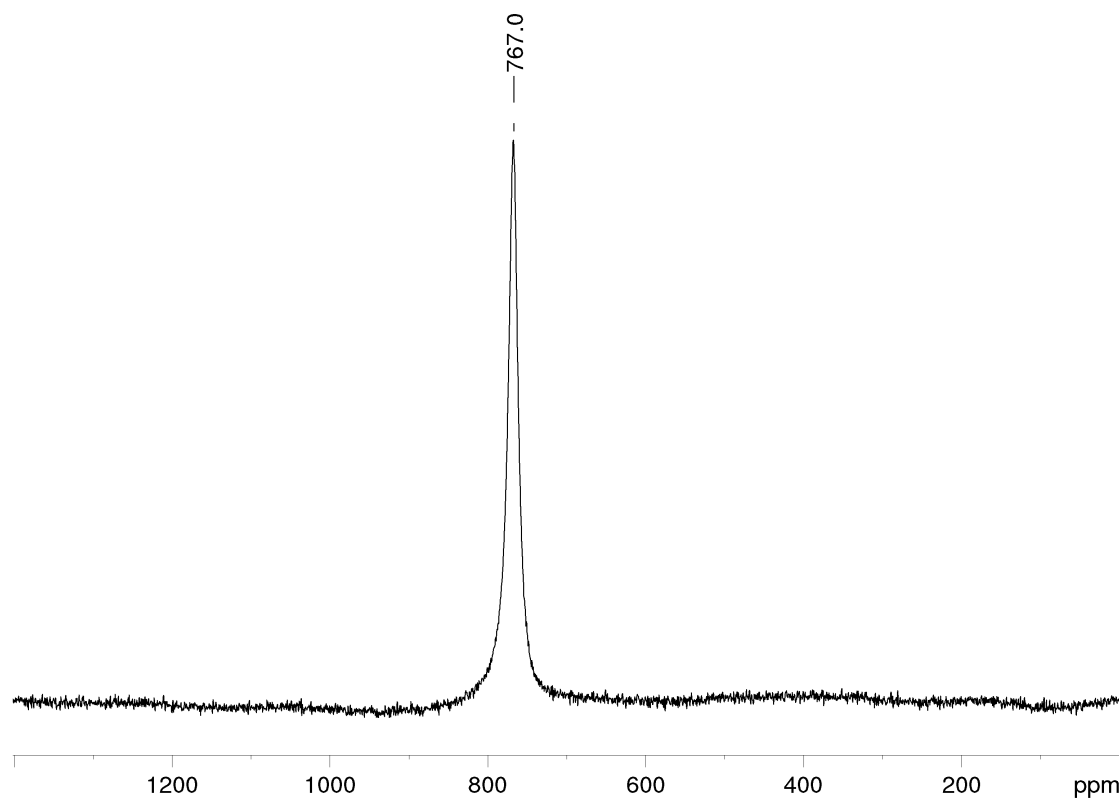

**Figure S13.**  $^{45}\text{Sc}$  NMR spectrum (122 MHz) of  $[\text{Sc}[\text{CH}(\text{SiMe}_3)_2]_3(\mu\text{-Cl})\text{Li}(\text{thf})_3$  (**2-Sc**) in  $[\text{D}_8]\text{THF}$  at 26 °C.

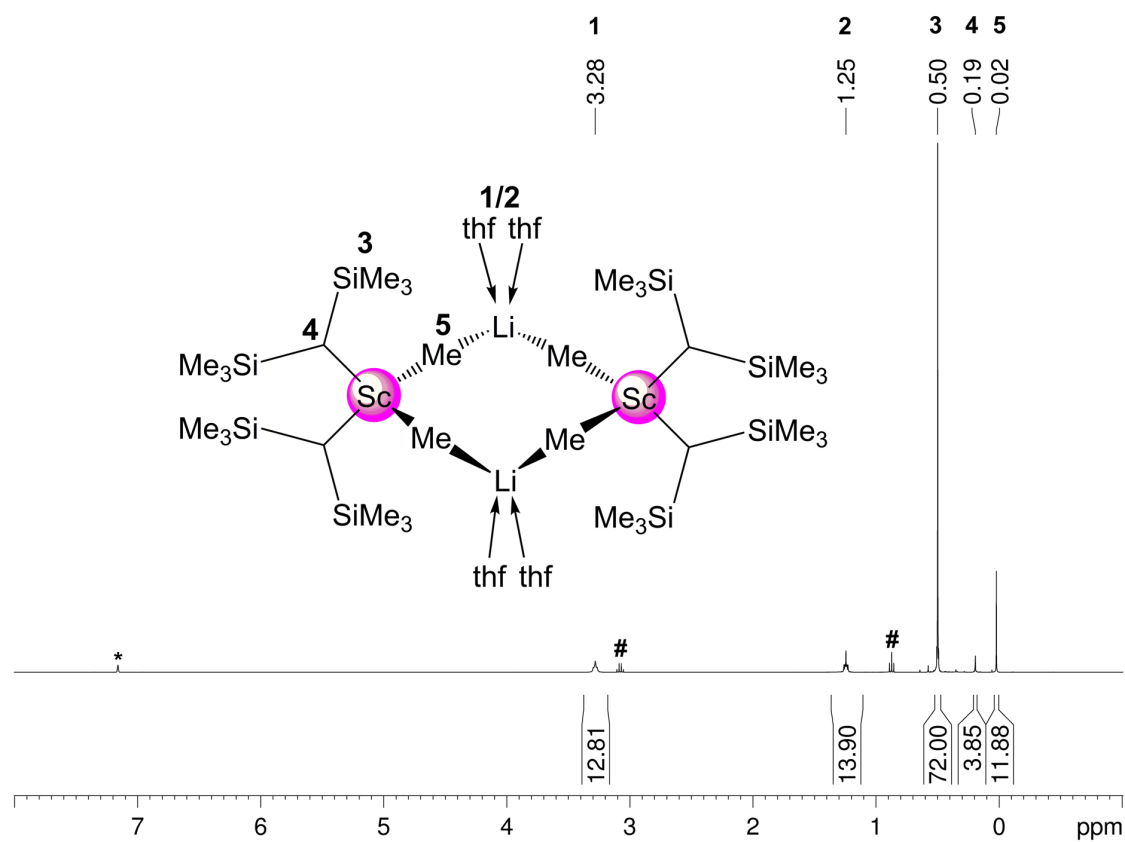

**Figure S14.**  $^1\text{H}$  NMR spectrum (500 MHz) of  $[\text{Sc}\{\text{CH}(\text{SiMe}_3)_2\}_2(\mu\text{-Me})_2\text{Li}(\text{thf})_2]_2$  (**3**) in  $\text{C}_6\text{D}_6$  at 26 °C. The solvent residual signal is marked with an asterisk. # for residual  $\text{Et}_2\text{O}$ .

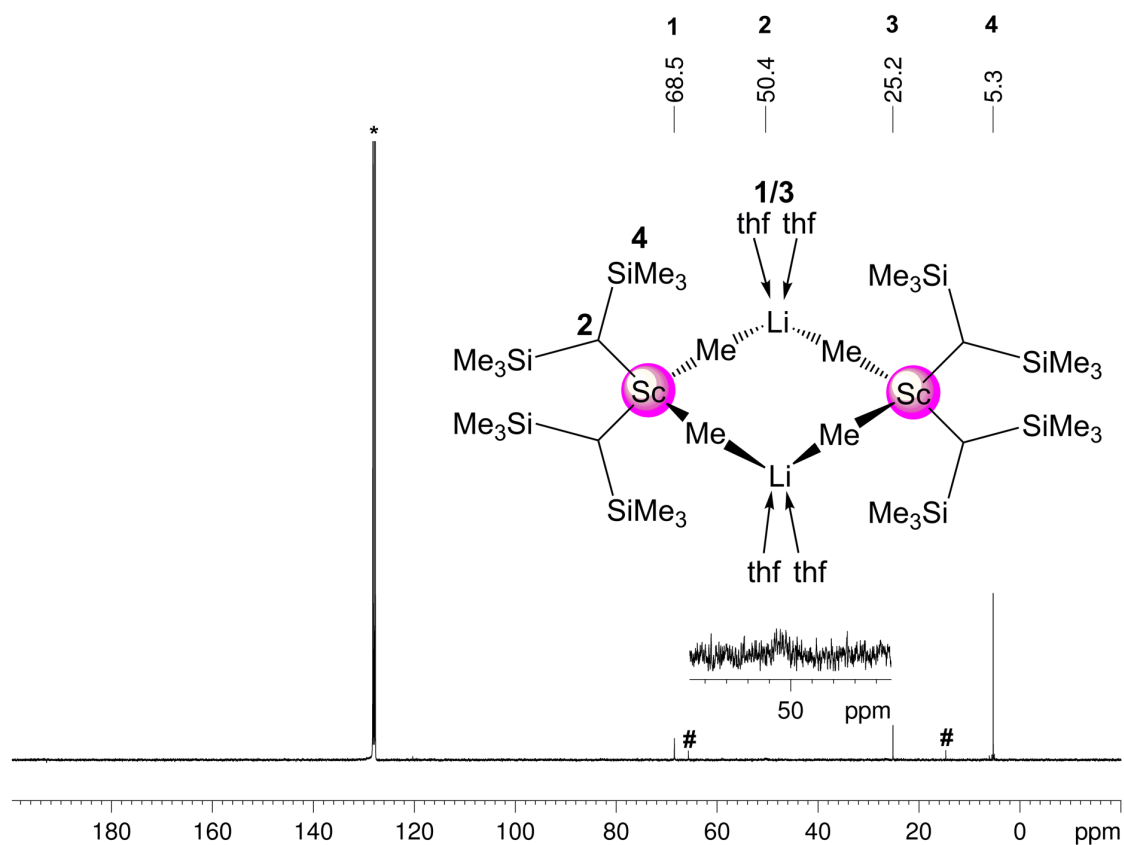

**Figure S15.**  $^{13}\text{C}\{^1\text{H}\}$  NMR spectrum (101 MHz) of  $[\text{Sc}\{\text{CH}(\text{SiMe}_3)_2\}_2(\mu\text{-Me})_2\text{Li}(\text{thf})_2]_2$  (**3**) in  $\text{C}_6\text{D}_6$  at 26 °C. The solvent residual signal is marked with an asterisk. # for residual  $\text{Et}_2\text{O}$ .

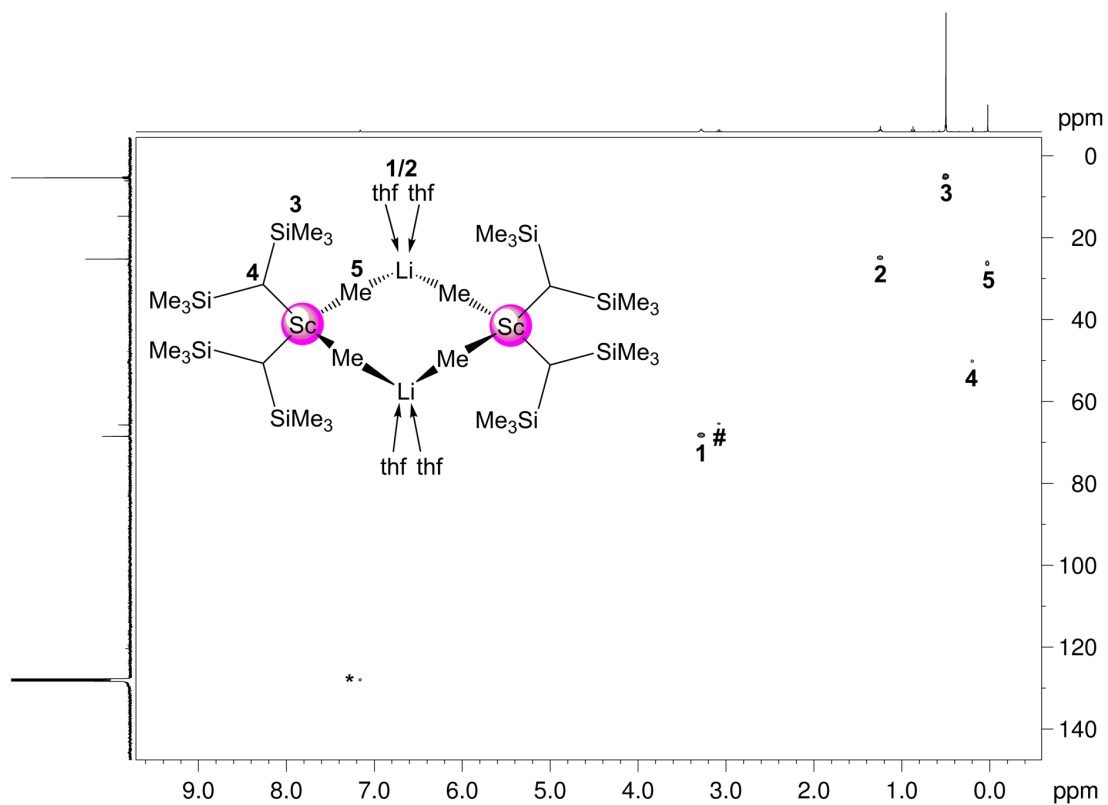

**Figure S16.**  $^1\text{H}$ - $^{13}\text{C}$  HSQC NMR spectrum of  $[\text{Sc}\{\text{CH}(\text{SiMe}_3)_2\}_2(\mu\text{-Me})_2\text{Li}(\text{thf})_2]_2$  (**3**) in  $\text{C}_6\text{D}_6$  at 26 °C. The solvent residual signal is marked with an asterisk. # for residual  $\text{Et}_2\text{O}$ .

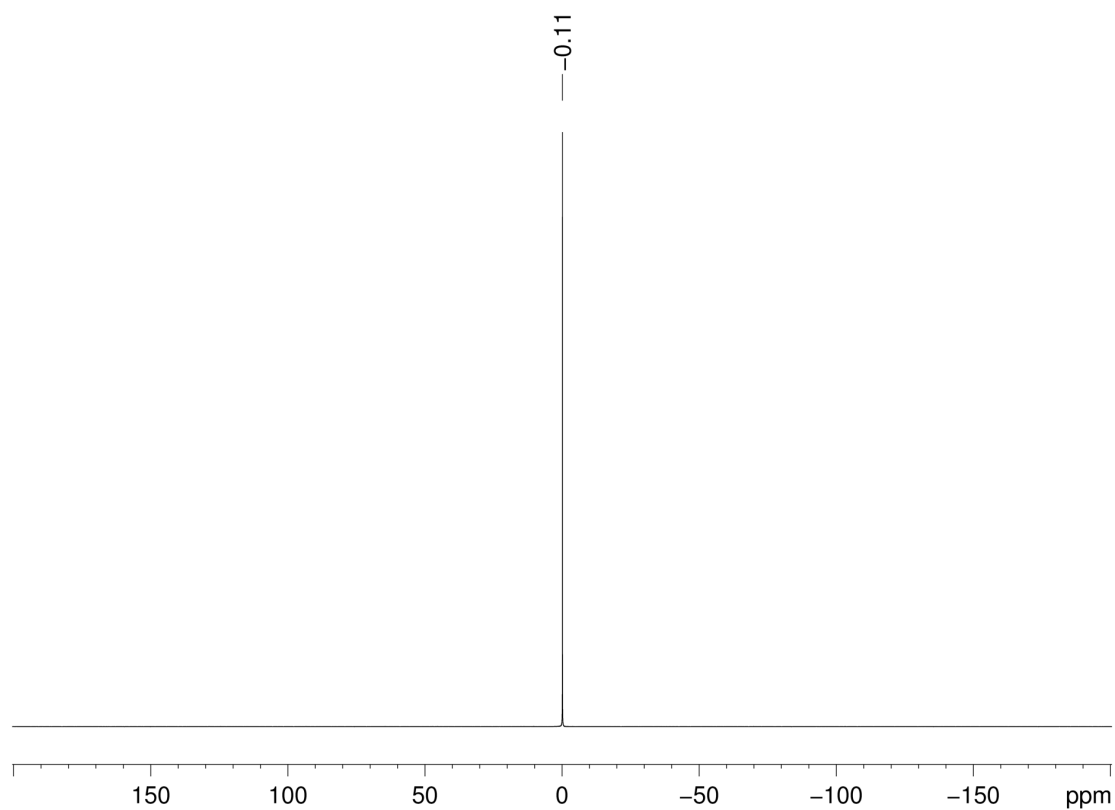

**Figure S17.**  $^7\text{Li}$  NMR spectrum (97 MHz) of  $[\text{Sc}\{\text{CH}(\text{SiMe}_3)_2\}_2(\mu\text{-Me})_2\text{Li}(\text{thf})_2]_2$  (**3**) in  $\text{C}_6\text{D}_6$  at 26 °C.

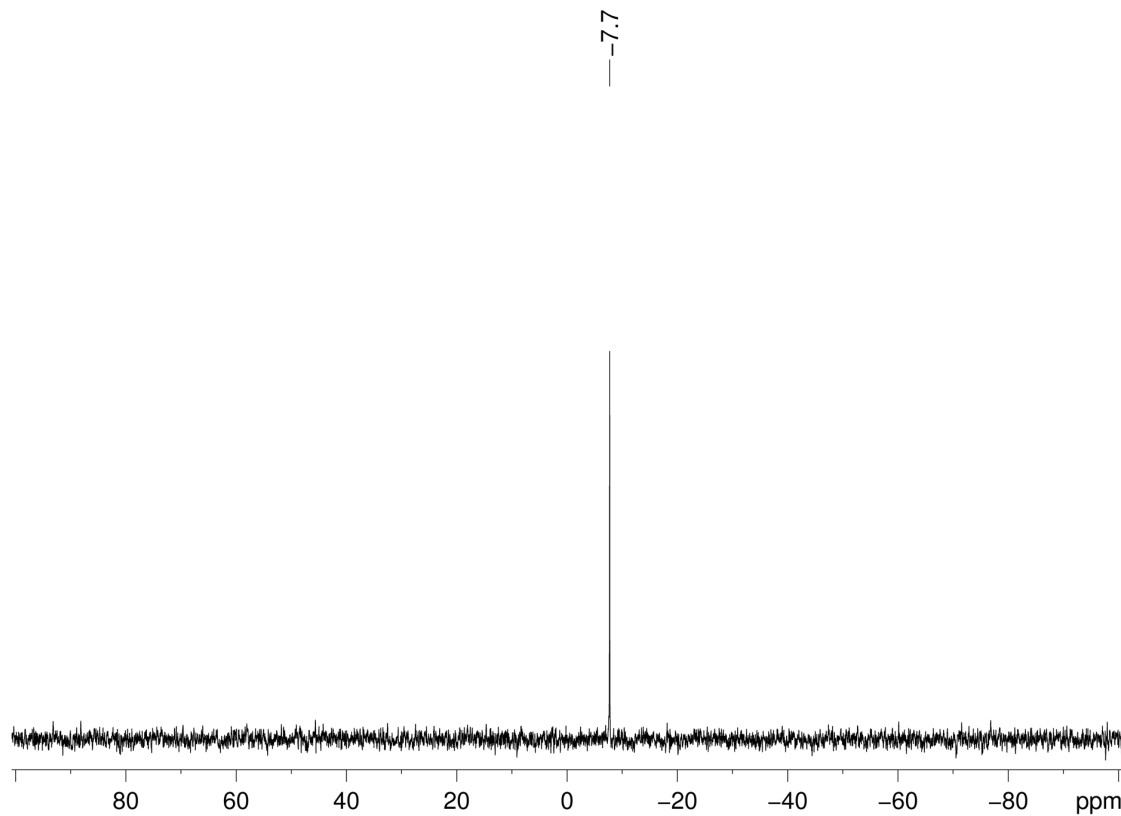

**Figure S18.**  $^{29}\text{Si}$  INEPT NMR spectrum (50 MHz) of  $[\text{Sc}\{\text{CH}(\text{SiMe}_3)_2\}_2(\mu\text{-Me})_2\text{Li}(\text{thf})_2]_2$  (**3**) in  $\text{C}_6\text{D}_6$  at 26 °C.

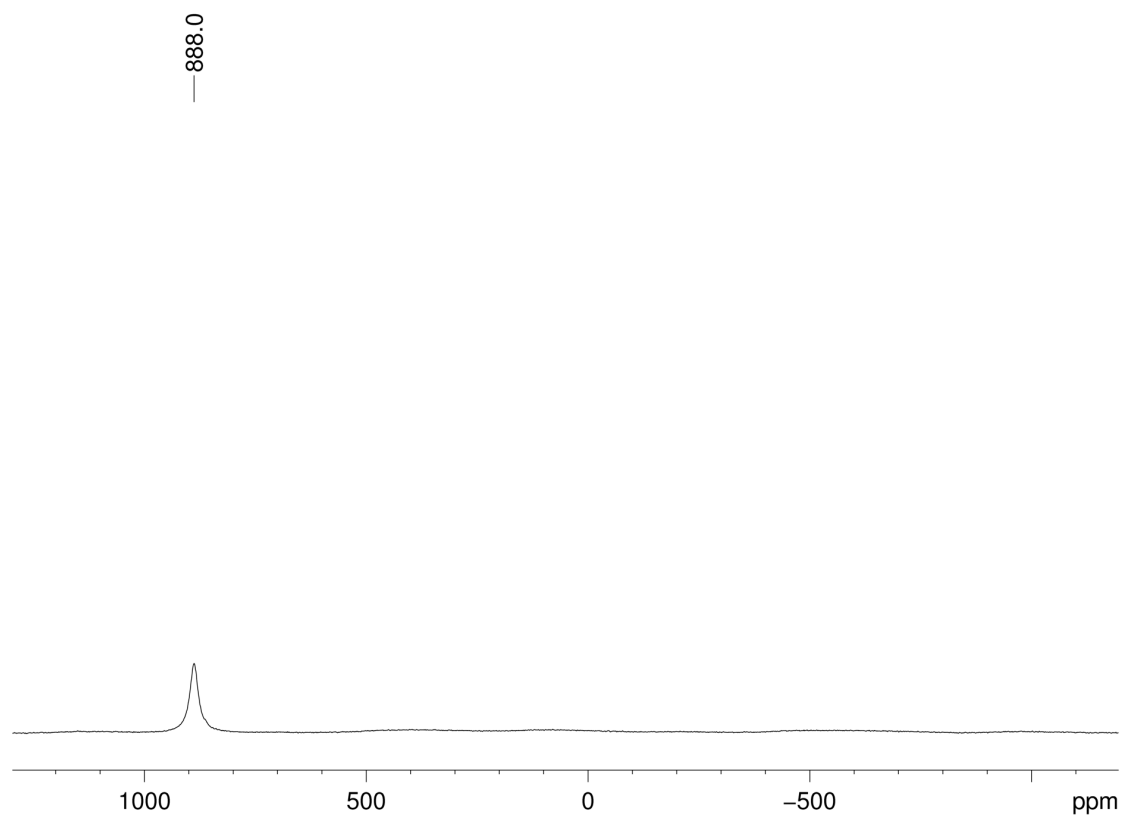

**Figure S19.**  $^{45}\text{Sc}$  NMR spectrum (122 MHz) of  $[\text{Sc}\{\text{CH}(\text{SiMe}_3)_2\}_2(\mu\text{-Me})_2\text{Li}(\text{thf})_2]_2$  (**3**) in  $\text{C}_6\text{D}_6$  at 26 °C.

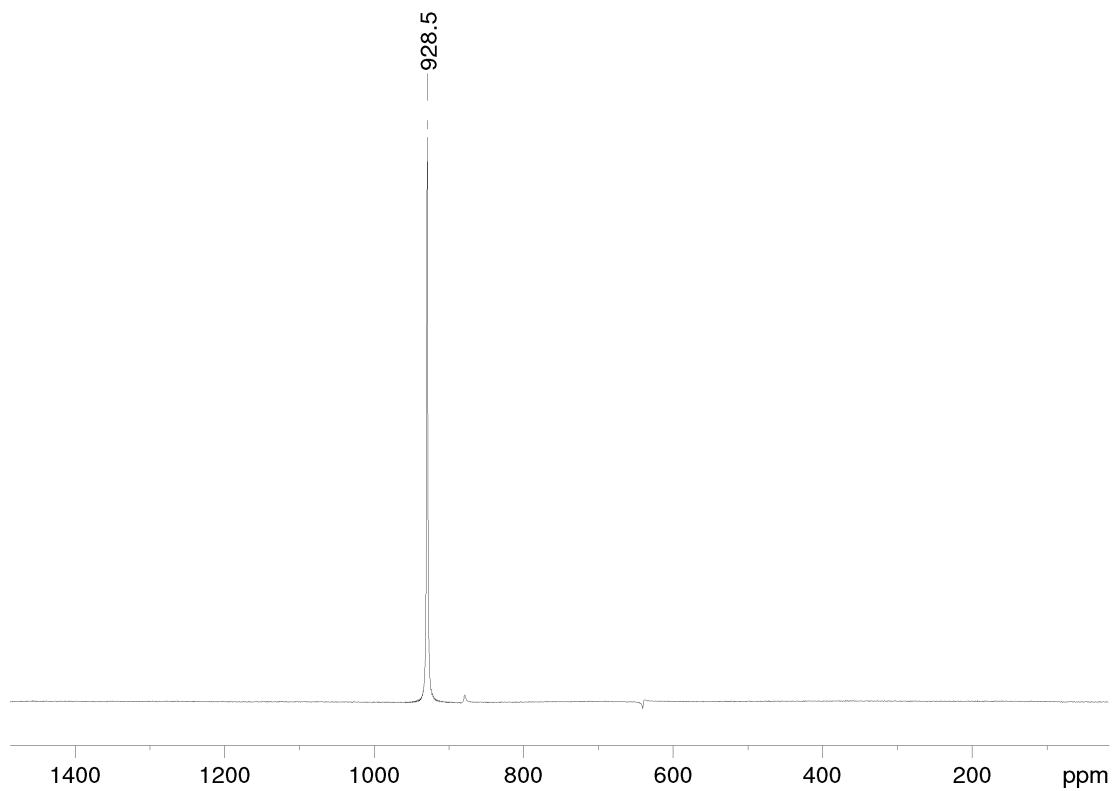

**Figure S20.**  $^{45}\text{Sc}$  NMR spectrum (122 MHz) of  $[\text{Sc}\{\text{CH}(\text{SiMe}_3)_2\}_2(\mu\text{-Me})_2\text{Li}(\text{thf})_2]_2$  (**3**) in  $[\text{D}_8]\text{THF}$  at 26 °C.

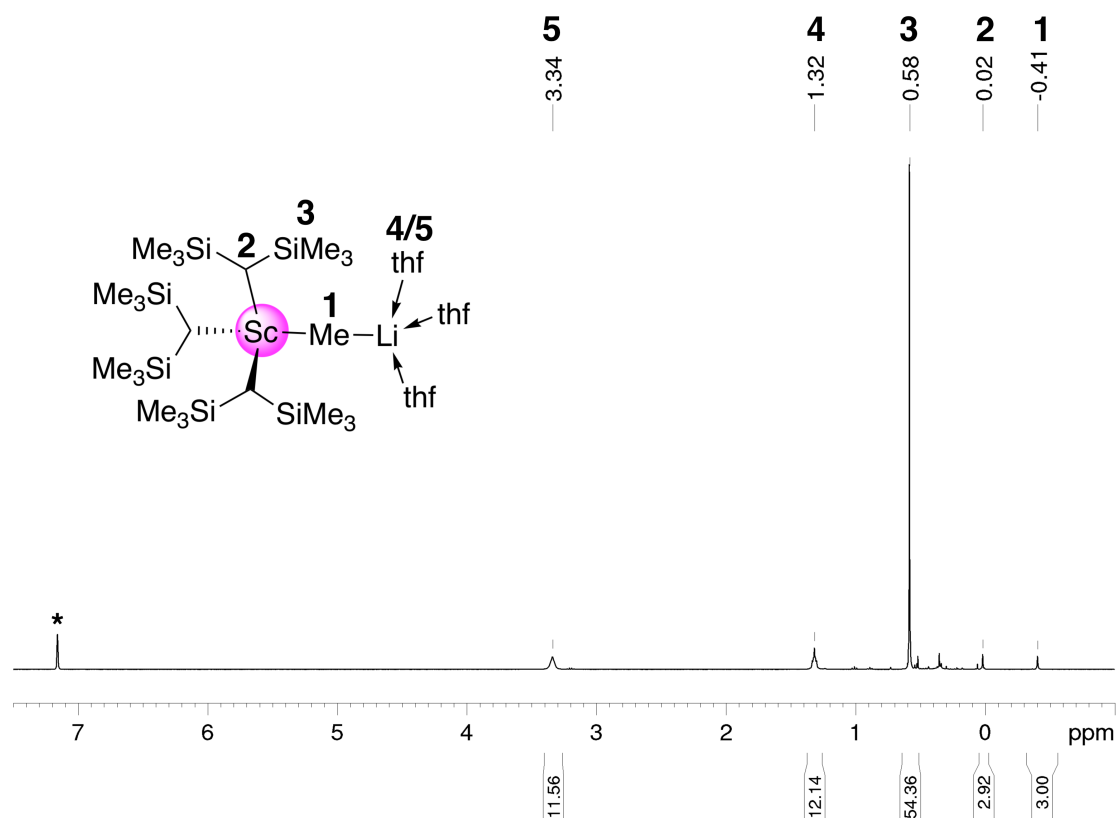

**Figure S21.**  $^1\text{H}$  NMR spectrum (400 MHz) of  $\text{Sc}[\text{CH}(\text{SiMe}_3)_2]_3(\mu\text{-Me})\text{Li}(\text{thf})_3$  (4) in  $\text{C}_6\text{D}_6$  at 26 °C. The solvent residual signal is marked with an asterisk.

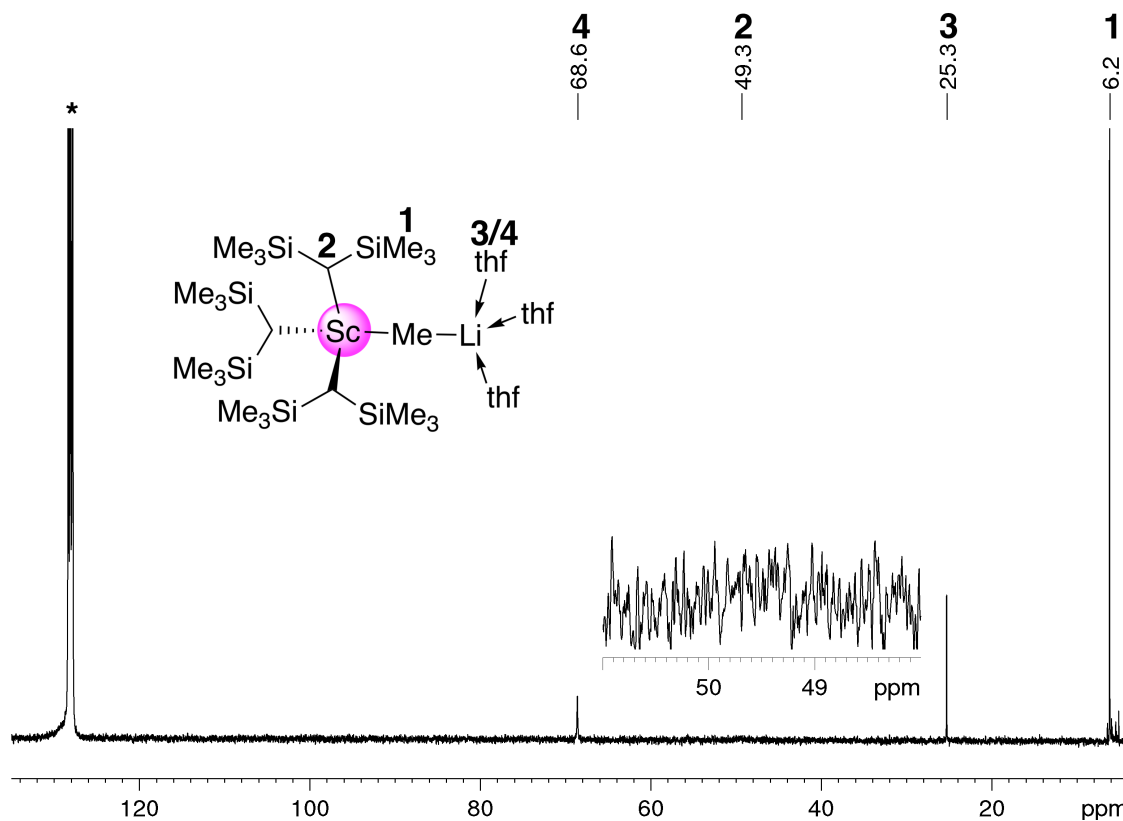

**Figure S22.**  $^{13}\text{C}\{^1\text{H}\}$  NMR spectrum (100 MHz) of  $\text{Sc}[\text{CH}(\text{SiMe}_3)_2]_3(\mu\text{-Me})\text{Li}(\text{thf})_3$  (4) in  $\text{C}_6\text{D}_6$  at 26 °C. The solvent residual signal is marked with an asterisk.

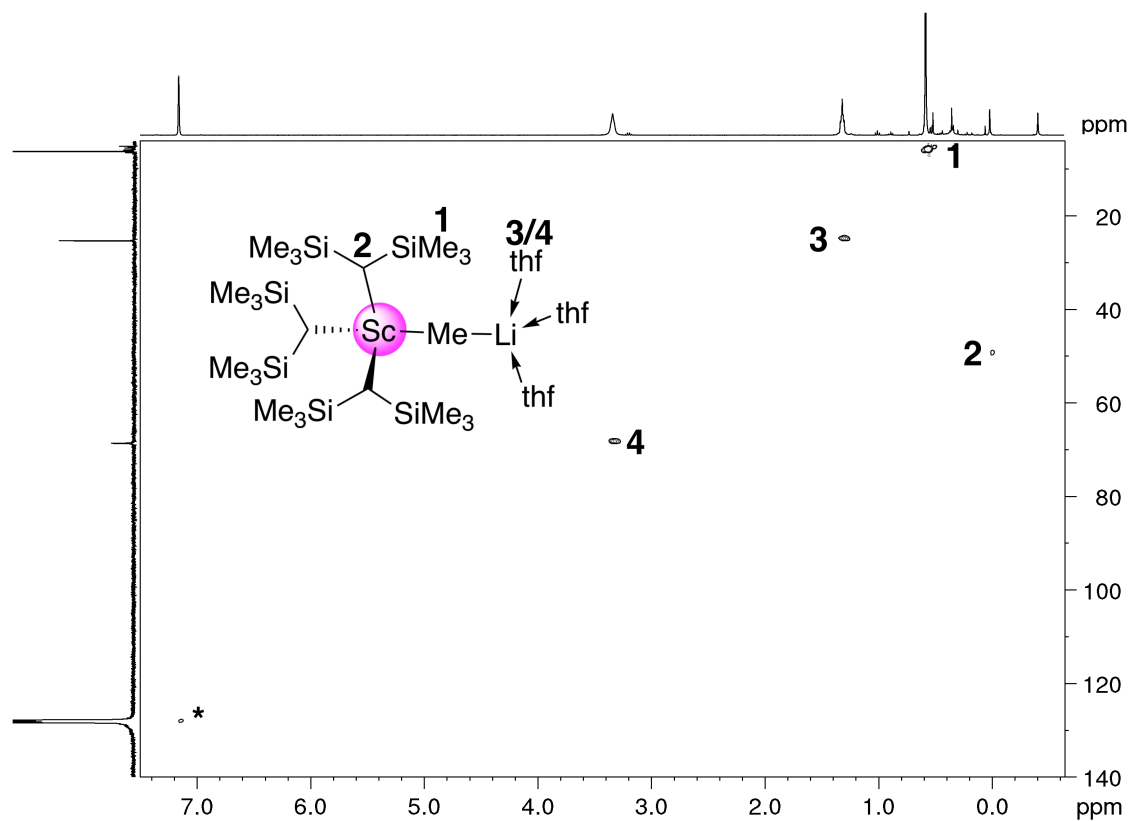

**Figure S23.**  $^1\text{H}$ - $^{13}\text{C}$  HSQC NMR spectrum of  $\text{Sc}[\text{CH}(\text{SiMe}_3)_2]_3(\mu\text{-Me})\text{Li}(\text{thf})_3$  (**4**) in  $\text{C}_6\text{D}_6$  at 26 °C. The solvent residual signal is marked with an asterisk.

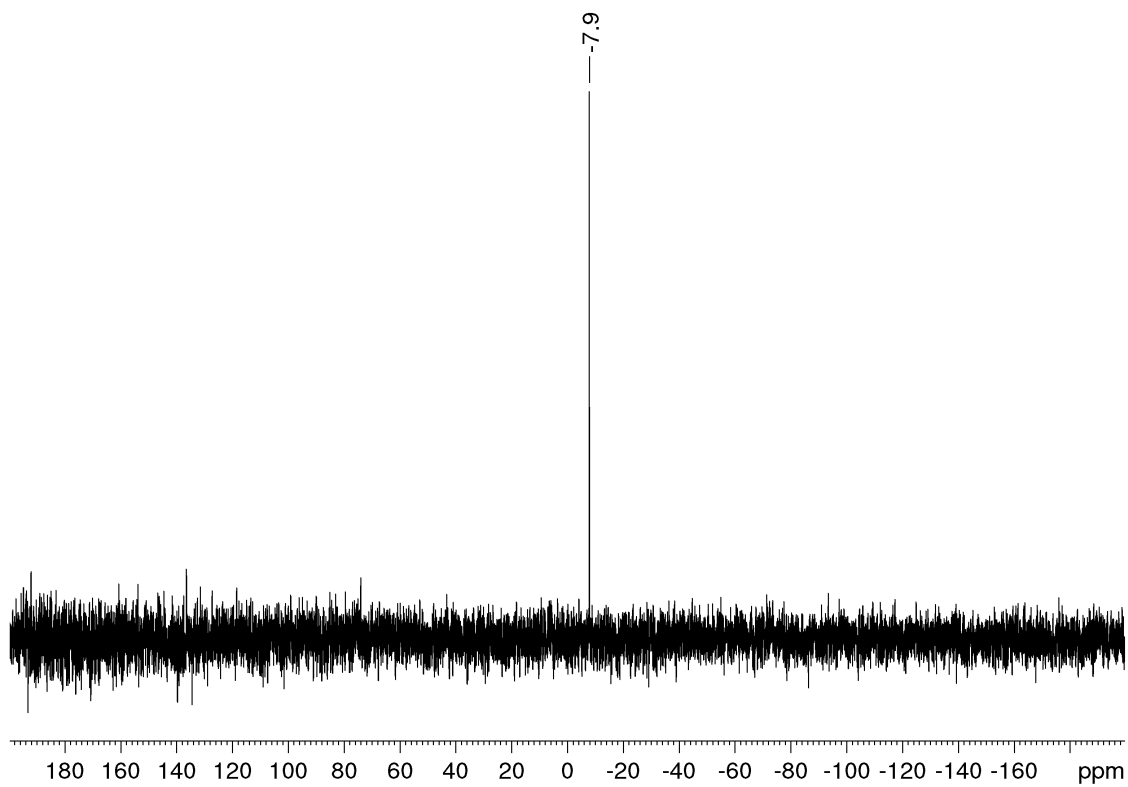

**Figure S24.**  $^{29}\text{Si}$  DEPT45 NMR spectrum (99 MHz) of  $\text{Sc}[\text{CH}(\text{SiMe}_3)_2]_3(\mu\text{-Me})\text{Li}(\text{thf})_3$  (**4**) in  $\text{C}_6\text{D}_6$  at 26 °C.

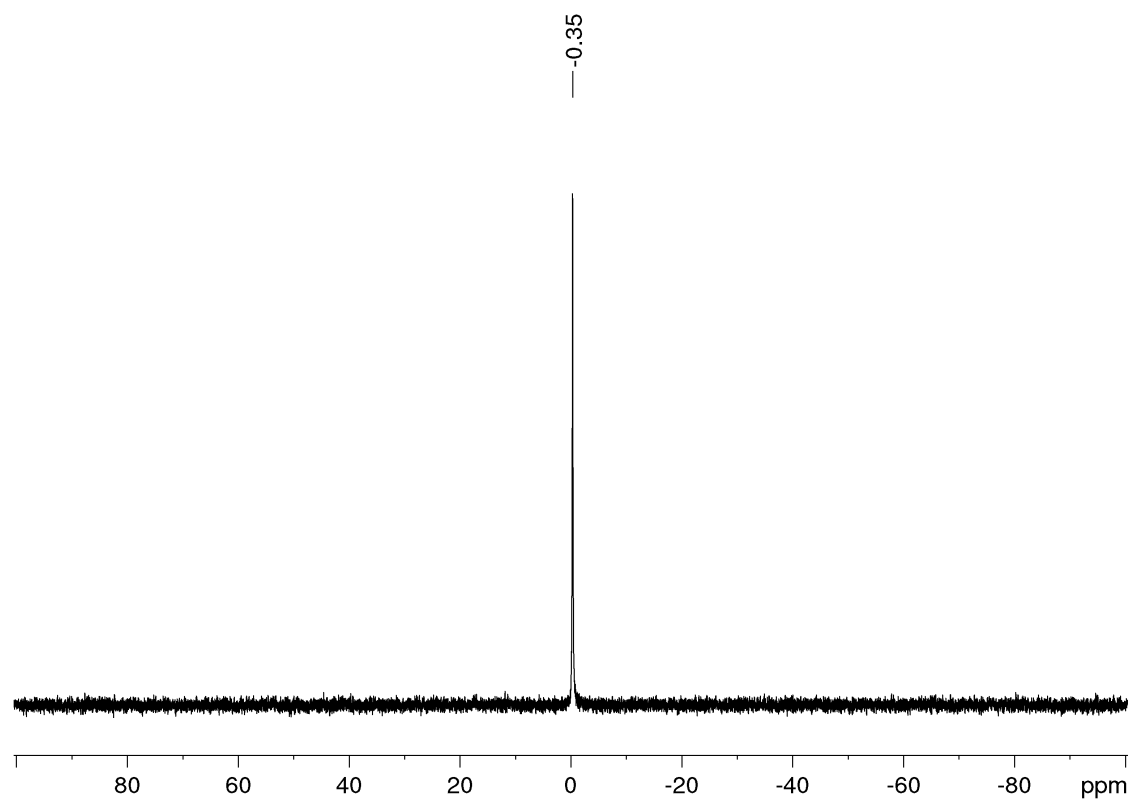

**Figure S25.**  ${}^7\text{Li}\{{}^1\text{H}\}$  NMR spectrum (194 MHz) of  $\text{Sc}[\text{CH}(\text{SiMe}_3)_2]_3(\mu\text{-Me})\text{Li}(\text{thf})_3$  (**4**) in  $\text{C}_6\text{D}_6$  at 26 °C.

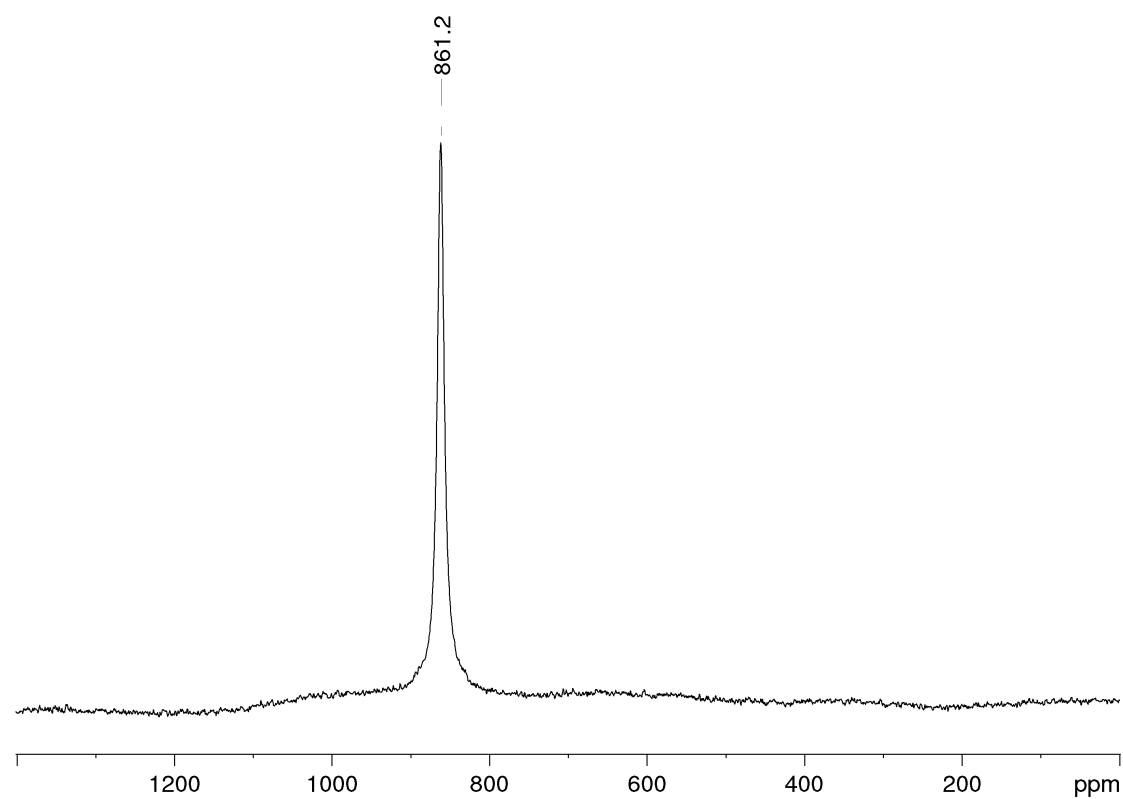

**Figure S26.**  ${}^{45}\text{Sc}$  NMR spectrum (122 MHz) of  $\text{Sc}[\text{CH}(\text{SiMe}_3)_2]_3(\mu\text{-Me})\text{Li}(\text{thf})_3$  (**4**) in  $\text{C}_6\text{D}_6$  at 26 °C

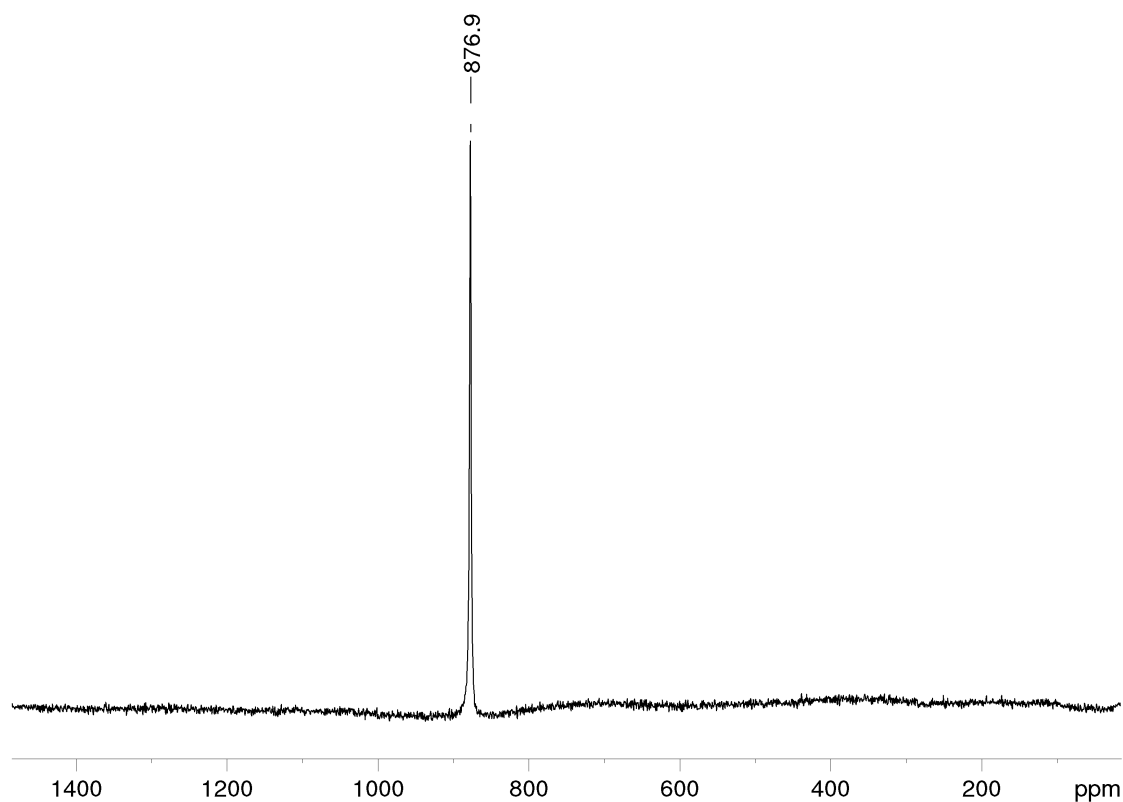

**Figure S27.**  $^{45}\text{Sc}$  NMR spectrum (122 MHz) of  $[\text{Sc}[\text{CH}(\text{SiMe}_3)_2]_3(\mu\text{-Me})\text{Li}(\text{thf})_3$  (**4**) in  $[\text{D}_8]\text{THF}$  at 26 °C.

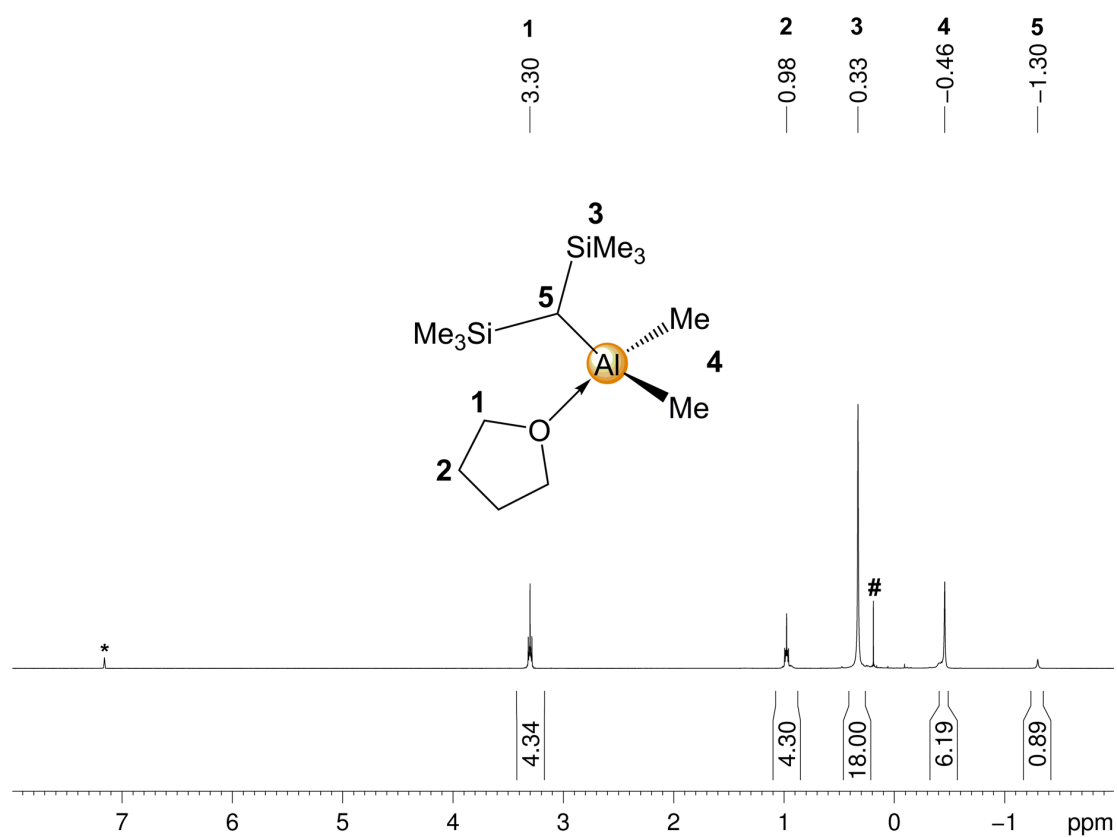

**Figure S28.**  $^1\text{H}$  NMR spectrum (400 MHz) of  $\text{Al}[\text{CH}(\text{SiMe}_3)_2]\text{Me}_2(\text{thf})$  (**5**) in  $\text{C}_6\text{D}_6$  at 26 °C. The solvent residual signal is marked with an asterisk. # for unknown by-product.

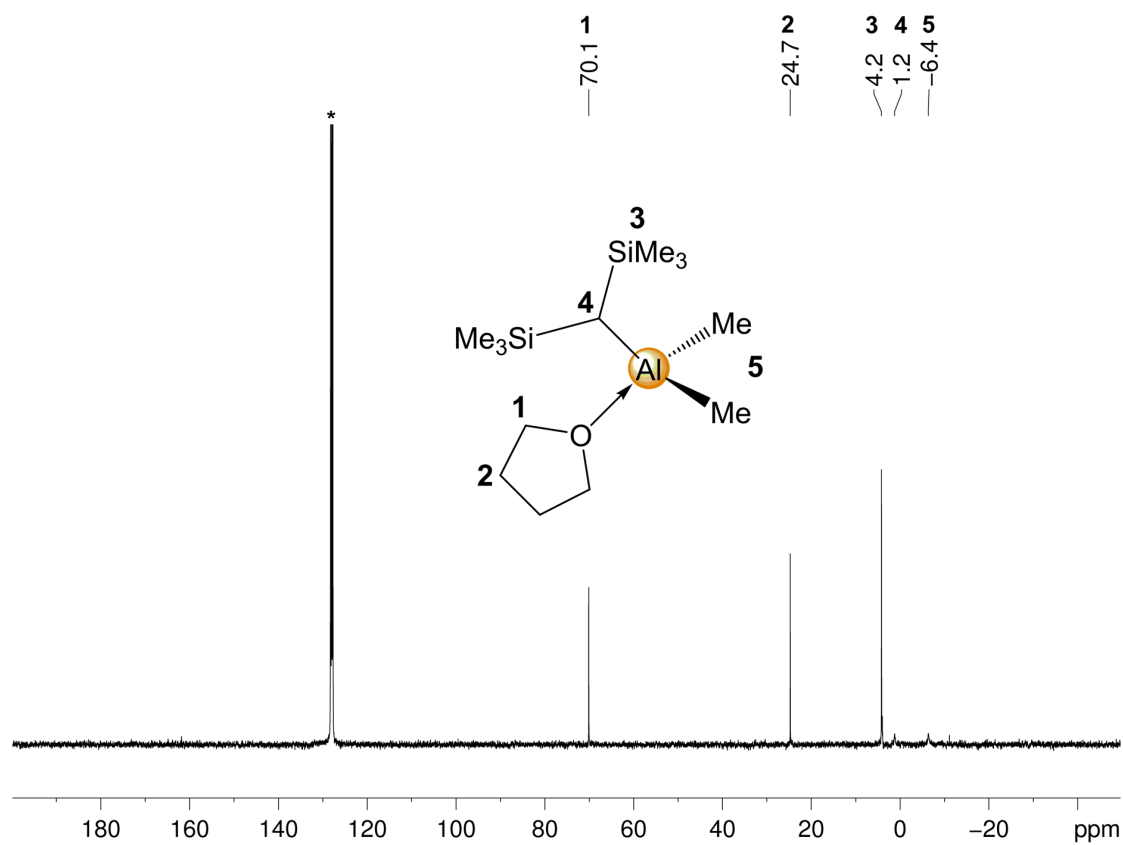

**Figure S29.**  $^{13}\text{C}\{^1\text{H}\}$  NMR spectrum (101 MHz) of  $\text{Al}[\text{CH}(\text{SiMe}_3)_2]\text{Me}_2(\text{thf})$  (**5**) in  $\text{C}_6\text{D}_6$  at 26 °C. The solvent residual signal is marked with an asterisk.

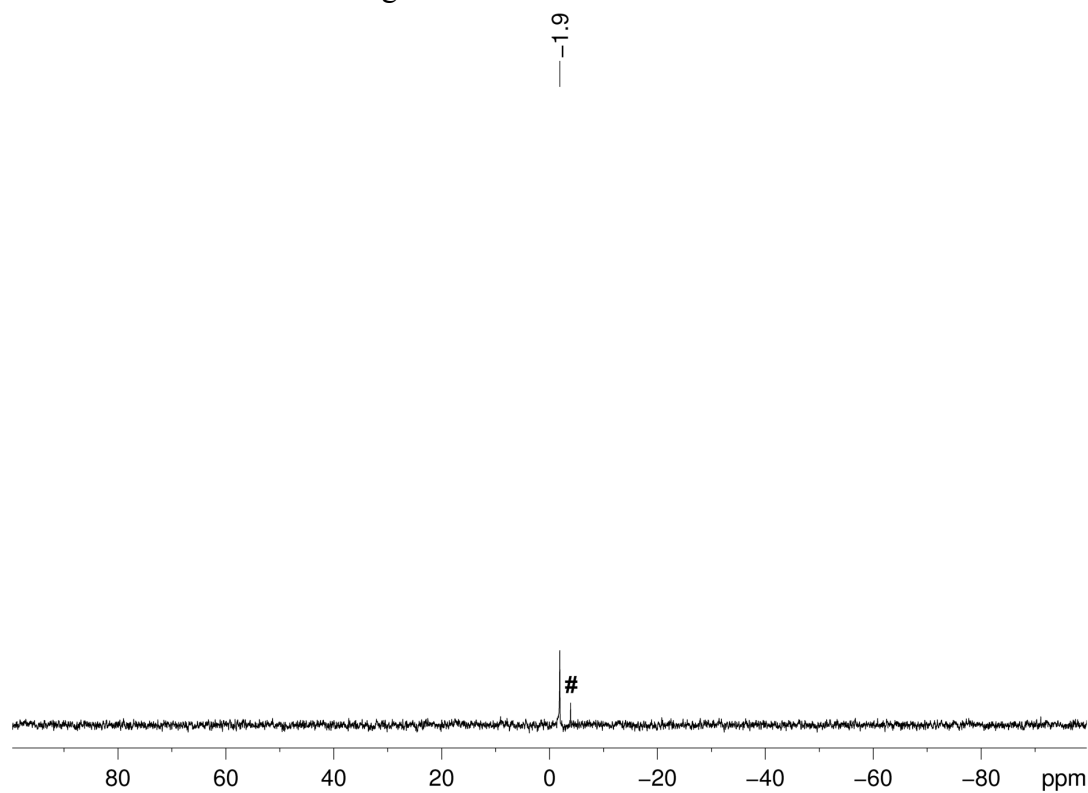

**Figure S30.**  $^{29}\text{Si}$  INEPT NMR spectrum (50 MHz) of  $\text{Al}[\text{CH}(\text{SiMe}_3)_2]\text{Me}_2(\text{thf})$  (**5**) in  $\text{C}_6\text{D}_6$  at 26 °C. # for unknown by-product.

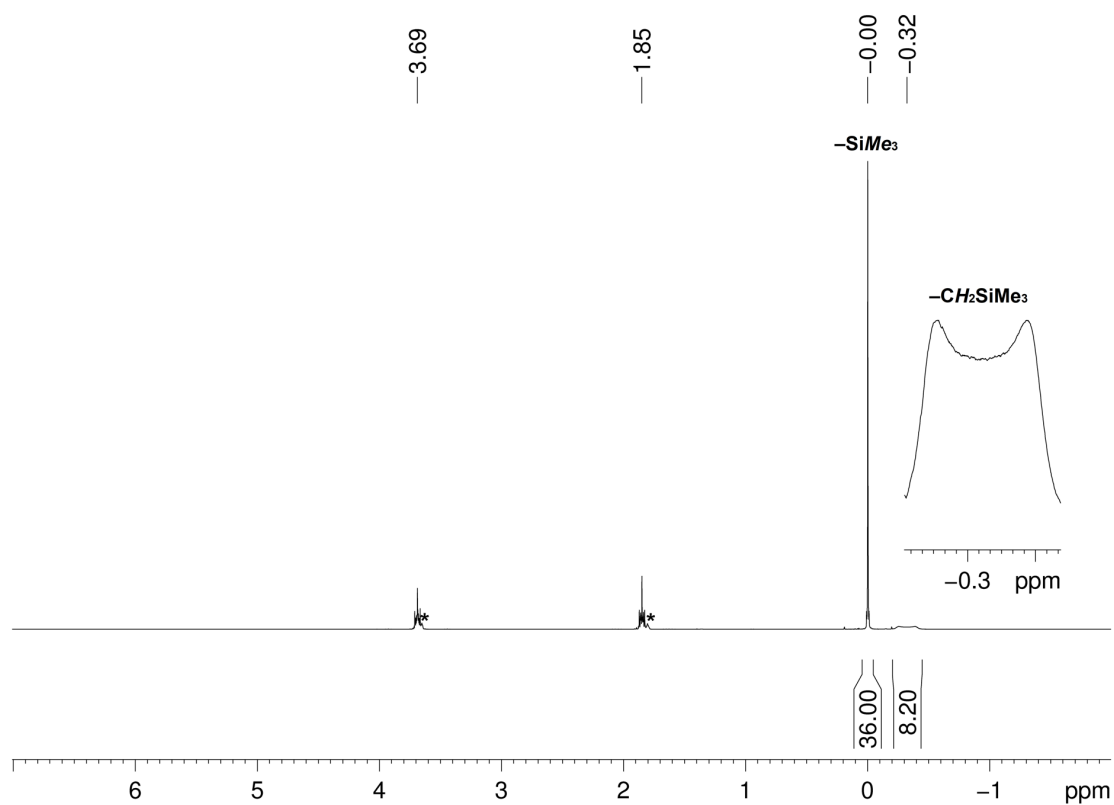

**Figure S31.**  $^1\text{H}$  NMR spectrum (500 MHz) of  $[\text{Sc}(\text{CH}_2\text{SiMe}_3)_4][\text{Li}(\text{thf})_4]$  (**6-Sc**) in  $[\text{D}_8]\text{THF}$  at 26 °C. The solvent residual signals are marked with asterisks.

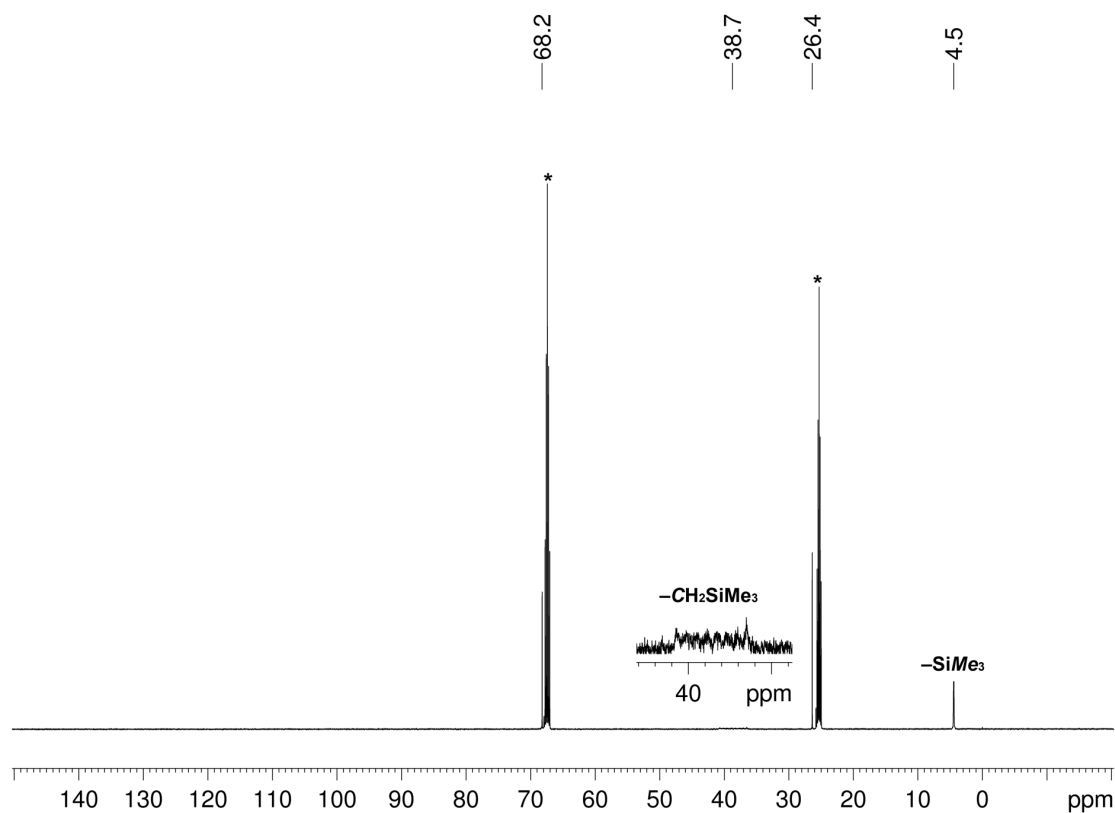

**Figure S32.**  $^{13}\text{C}\{^1\text{H}\}$  NMR spectrum (126 MHz) of  $[\text{Sc}(\text{CH}_2\text{SiMe}_3)_4][\text{Li}(\text{thf})_4]$  (**6-Sc**) in  $[\text{D}_8]\text{THF}$  at 26 °C. The solvent residual signals are marked with asterisks.

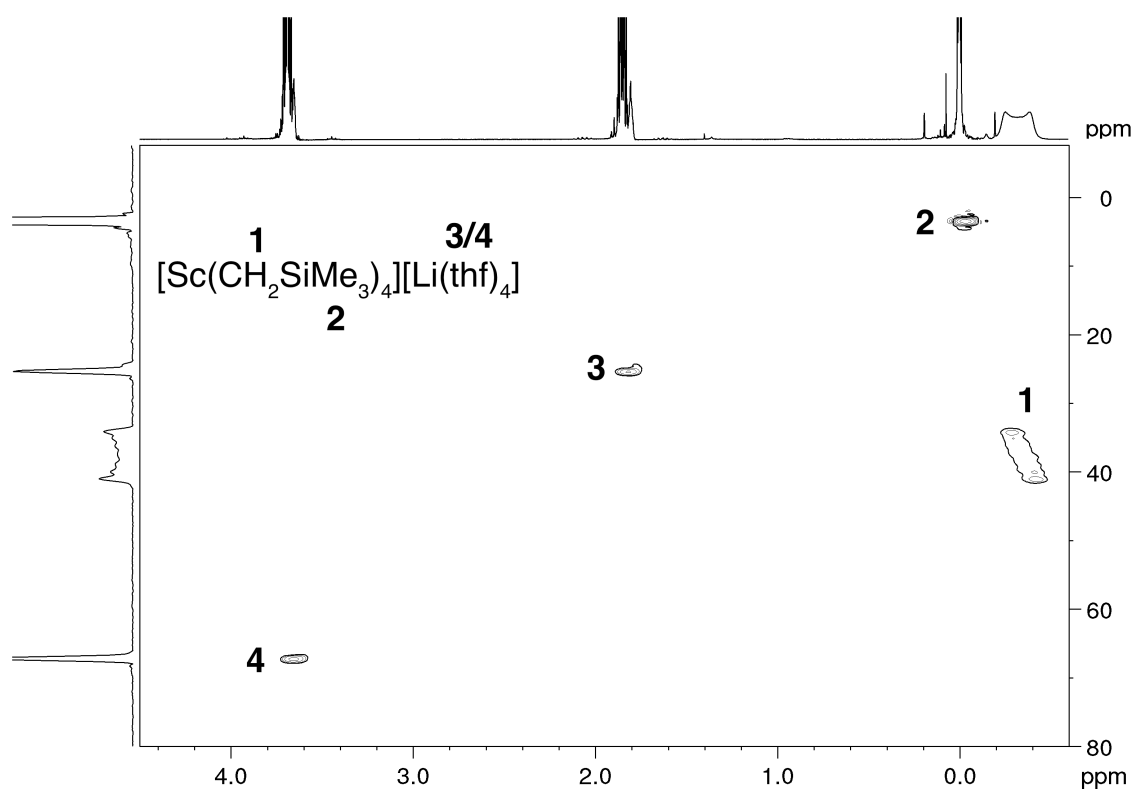

**Figure S33.**  $^1\text{H}$ - $^{13}\text{C}$  HSQC NMR spectrum of  $[\text{Sc}(\text{CH}_2\text{SiMe}_3)_4][\text{Li}(\text{thf})_4]$  (**6-Sc**) in  $[\text{D}_8]\text{THF}$  at  $26\text{ }^\circ\text{C}$ .

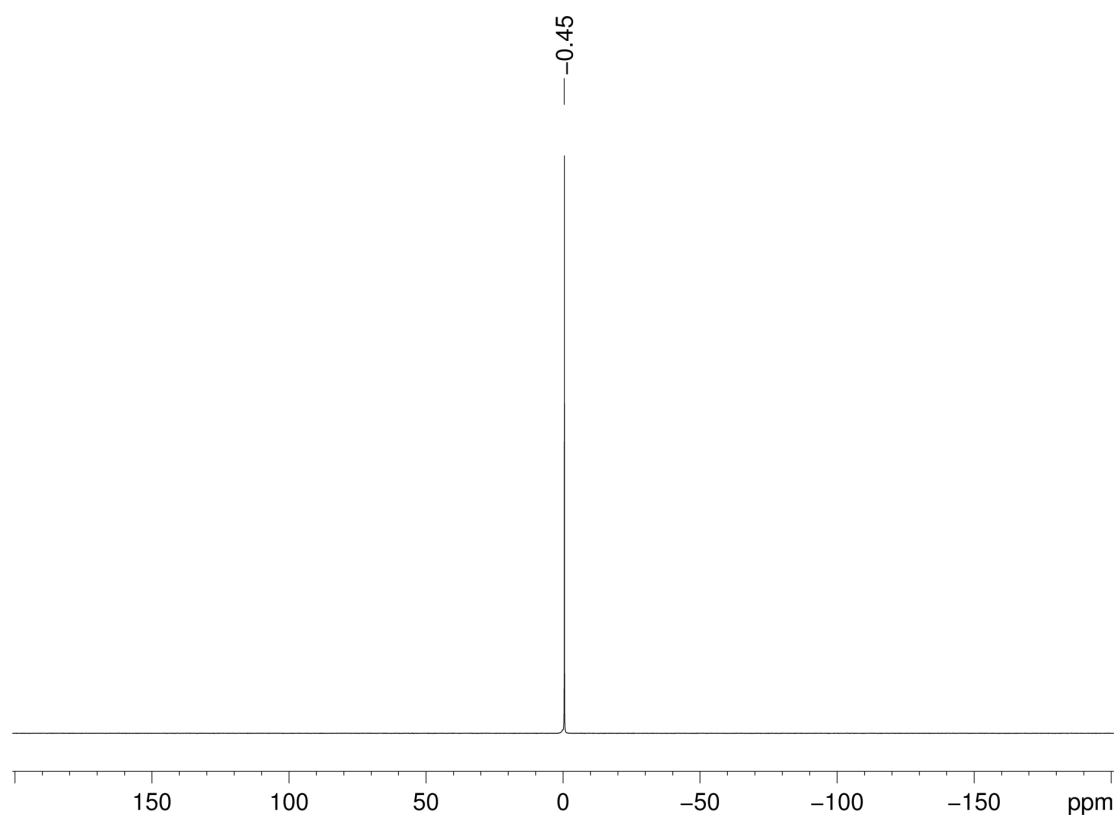

**Figure S34.**  $^7\text{Li}$  NMR spectrum (194 MHz) of  $[\text{Sc}(\text{CH}_2\text{SiMe}_3)_4][\text{Li}(\text{thf})_4]$  (**6-Sc**) in  $[\text{D}_8]\text{THF}$  at  $26\text{ }^\circ\text{C}$ .

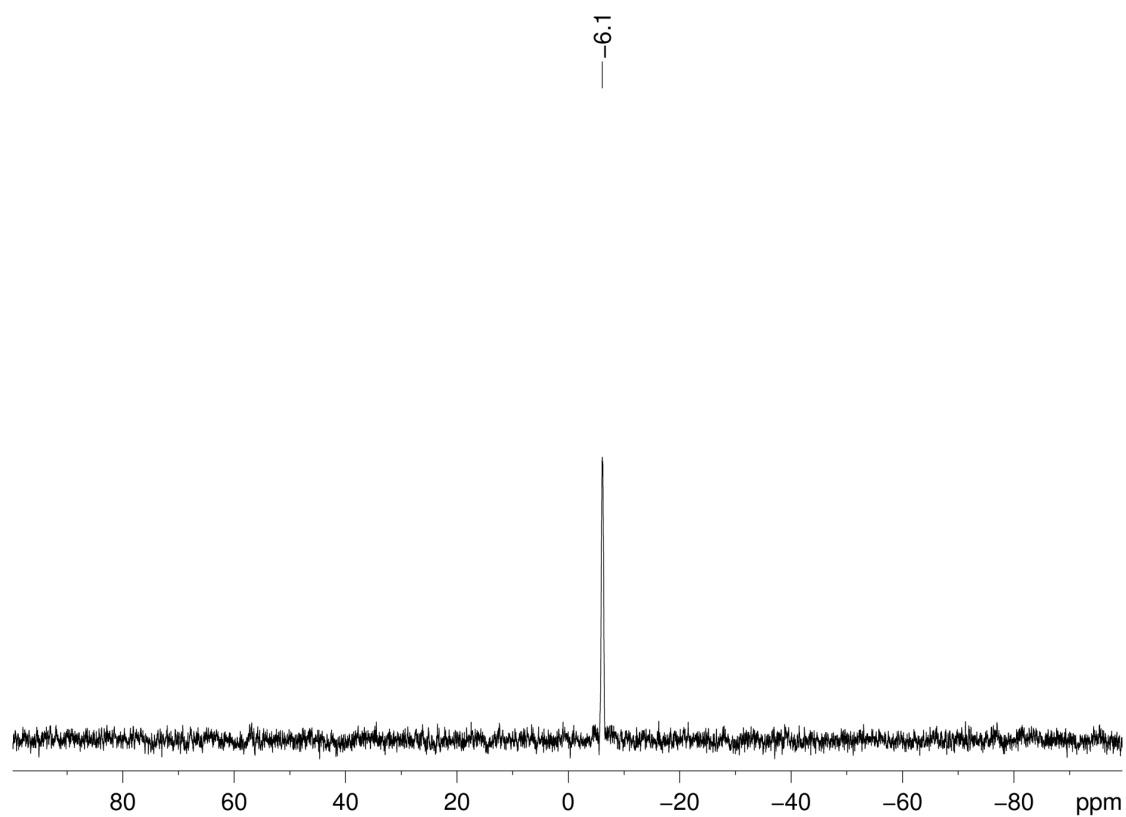

**Figure S35.**  $^{29}\text{Si}$  NMR spectrum (60 MHz) of  $[\text{Sc}(\text{CH}_2\text{SiMe}_3)_4][\text{Li}(\text{thf})_4]$  (**6-Sc**) in  $[\text{D}_8]\text{THF}$  at 26 °C.

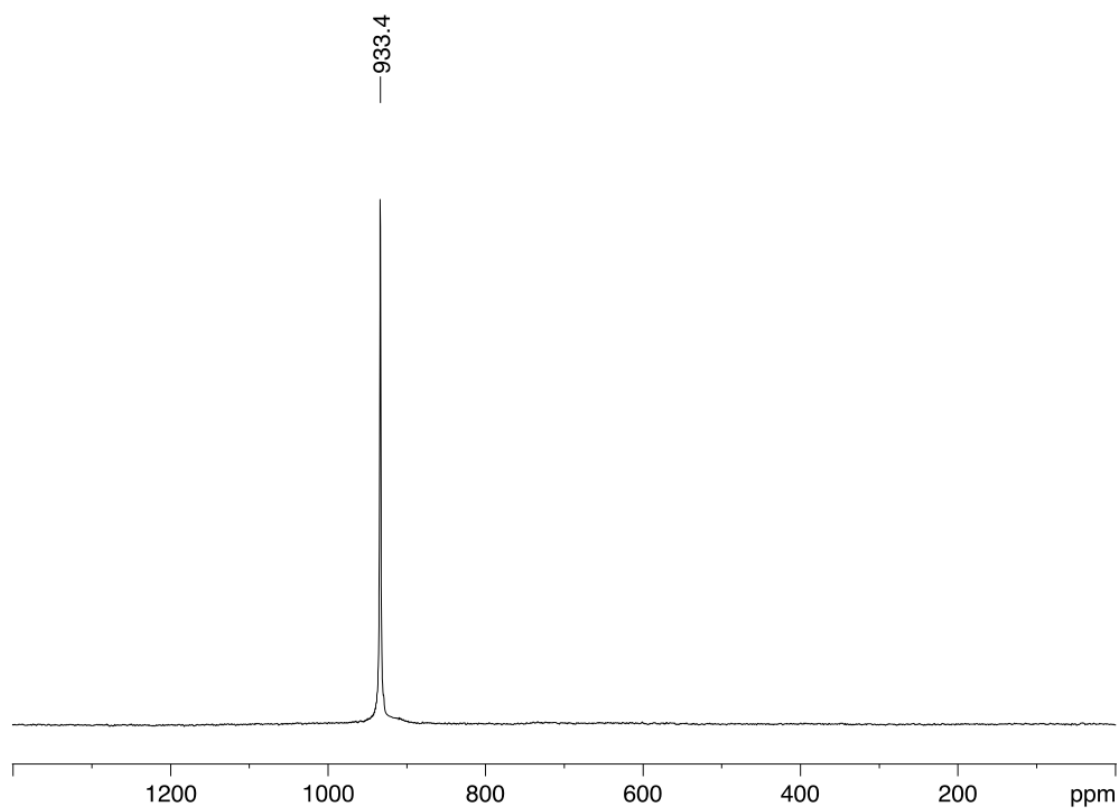

**Figure S36.**  $^{45}\text{Sc}$  NMR spectrum (122 MHz) of  $[\text{Sc}(\text{CH}_2\text{SiMe}_3)_4][\text{Li}(\text{thf})_4]$  (**6-Sc**) in  $\text{C}_6\text{D}_6$  at 26 °C.

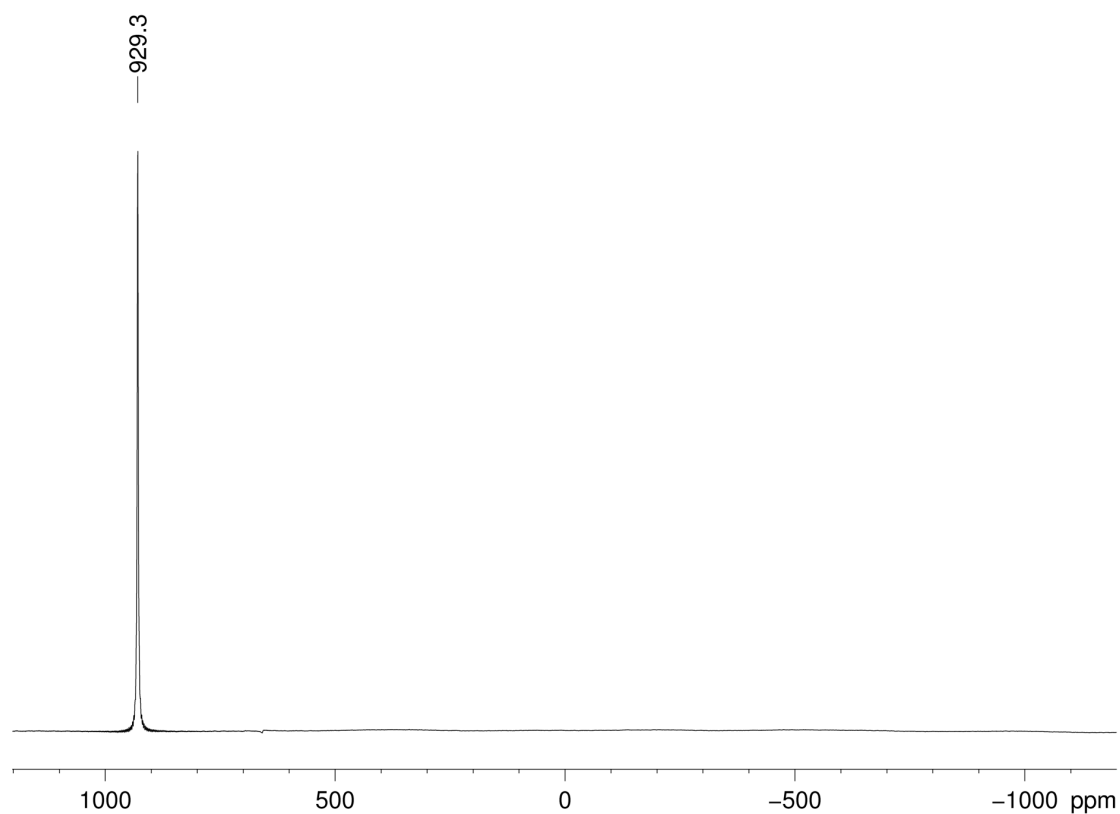

**Figure S37.**  $^{45}\text{Sc}$  NMR spectrum (122 MHz) of  $[\text{Sc}(\text{CH}_2\text{SiMe}_3)_4][\text{Li}(\text{thf})_4]$  (**6-Sc**) in  $[\text{D}_8]\text{THF}$  at 26 °C.

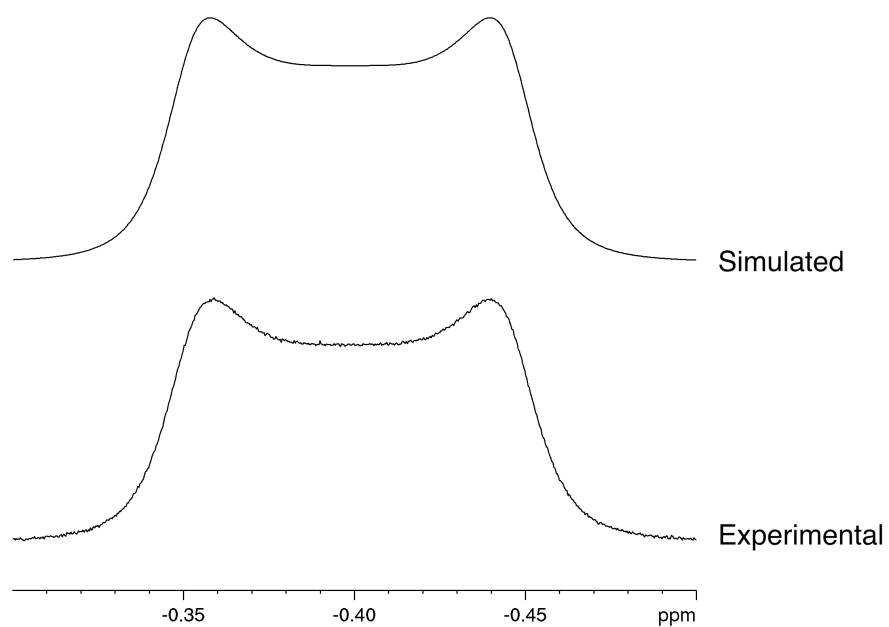

**Figure S38.** Comparison of simulated (top) and experimental (bottom)  $^1\text{H}$  NMR spectrum (500 MHz) of  $[\text{Sc}(\text{CH}_2\text{SiMe}_3)_4][\text{Li}(\text{thf})_4]$  (**6-Sc**) in  $[\text{D}_8]\text{THF}$  at 26 °C ( $\text{CH}_2\text{SiMe}_3$  peak range). The parameters of the simulated spectrum are:  $\delta_{\text{iso}} = -0.399$  ppm,  $J = 8.1$  Hz, coupled to: Sc-45,  $T_1 = 0.036$  s.

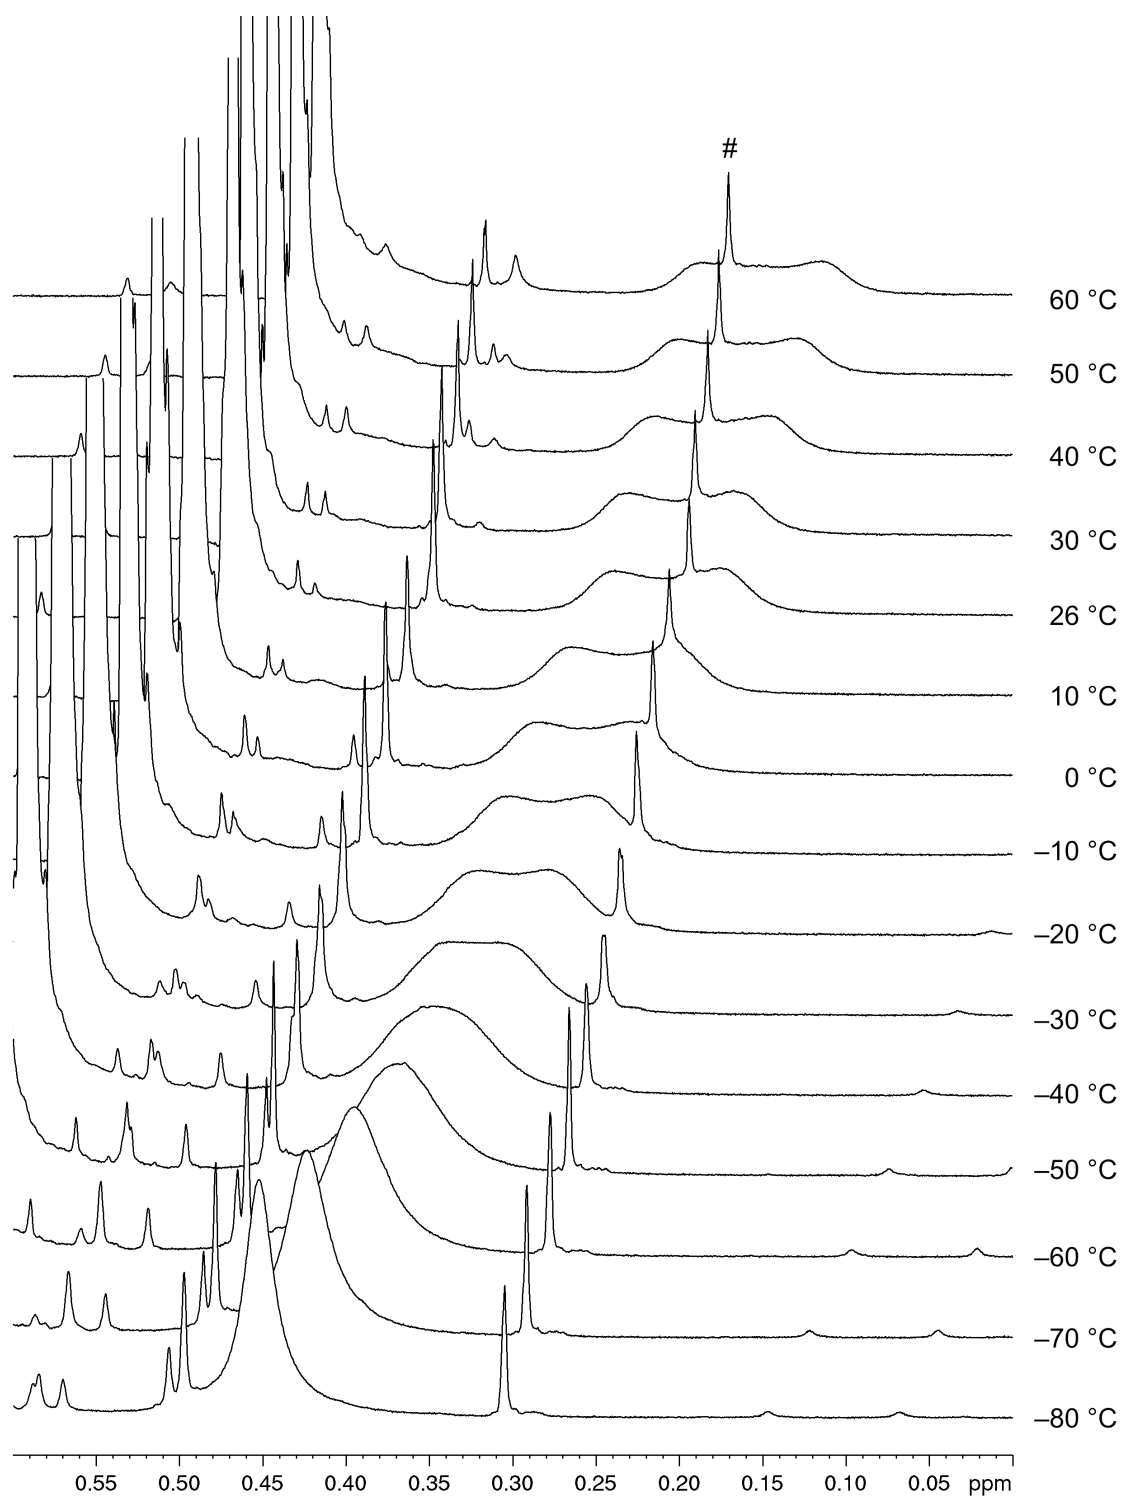

**Figure S39.** VT <sup>1</sup>H NMR spectrum (500 MHz) of [Sc(CH<sub>2</sub>SiMe<sub>3</sub>)<sub>4</sub>][Li(thf)<sub>4</sub>] (**6-Sc**) in [D<sub>8</sub>]THF. # is an unknown impurity.

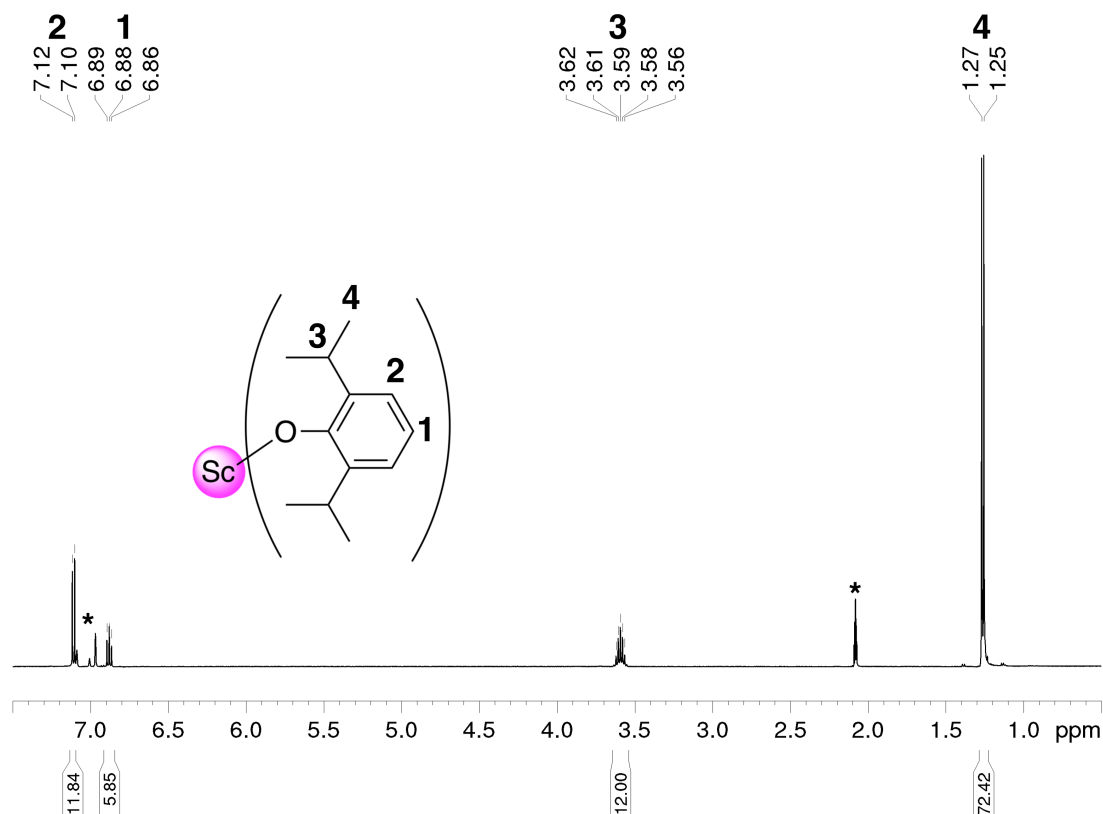

**Figure S40.**  $^1\text{H}$  NMR spectrum (500 MHz) of  $[\text{Sc}(\mu\text{-OC}_6\text{H}_3\text{iPr}_2\text{-2,6})(\text{OC}_6\text{H}_3\text{iPr}_2\text{-2,6})_2]_2$  (7) in  $[\text{D}_8]\text{toluene}$  at 26 °C. The solvent residual signals are marked with an asterisk.

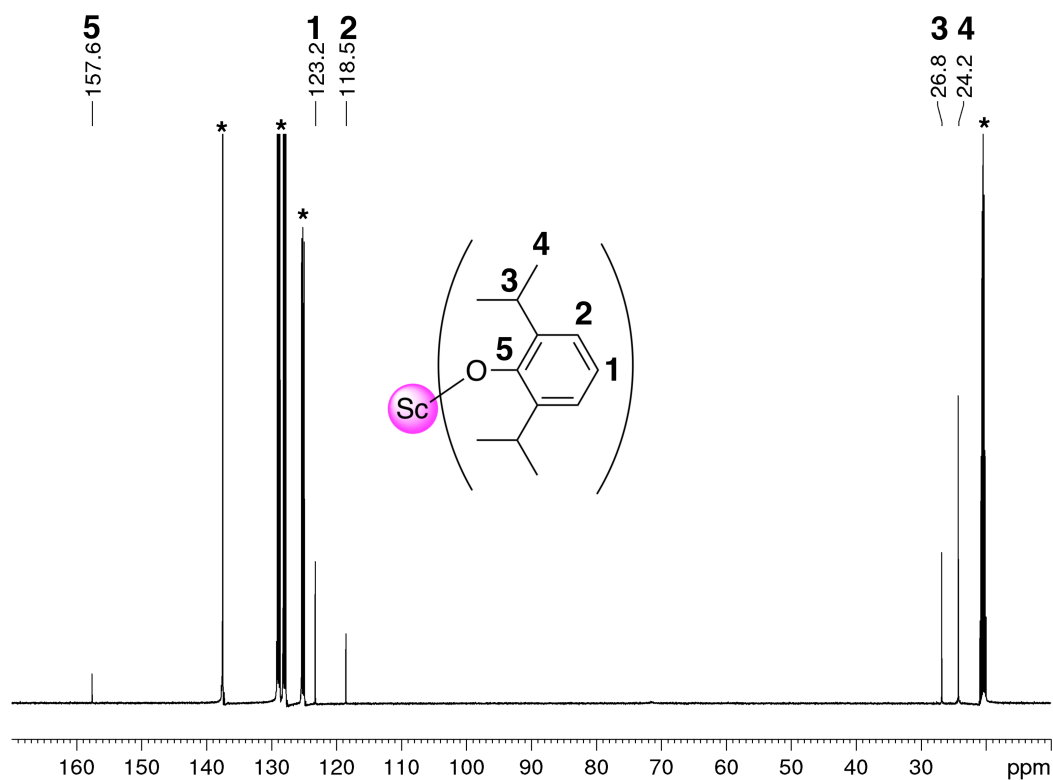

**Figure S41.**  $^{13}\text{C}\{^1\text{H}\}$  NMR spectrum (126 MHz) of  $\text{Sc}(\mu\text{-OC}_6\text{H}_3\text{iPr}_2\text{-2,6})(\text{OC}_6\text{H}_3\text{iPr}_2\text{-2,6})_2$  (7) in  $[\text{D}_8]\text{toluene}$  at 26 °C. The solvent residual signals are marked with an asterisk.

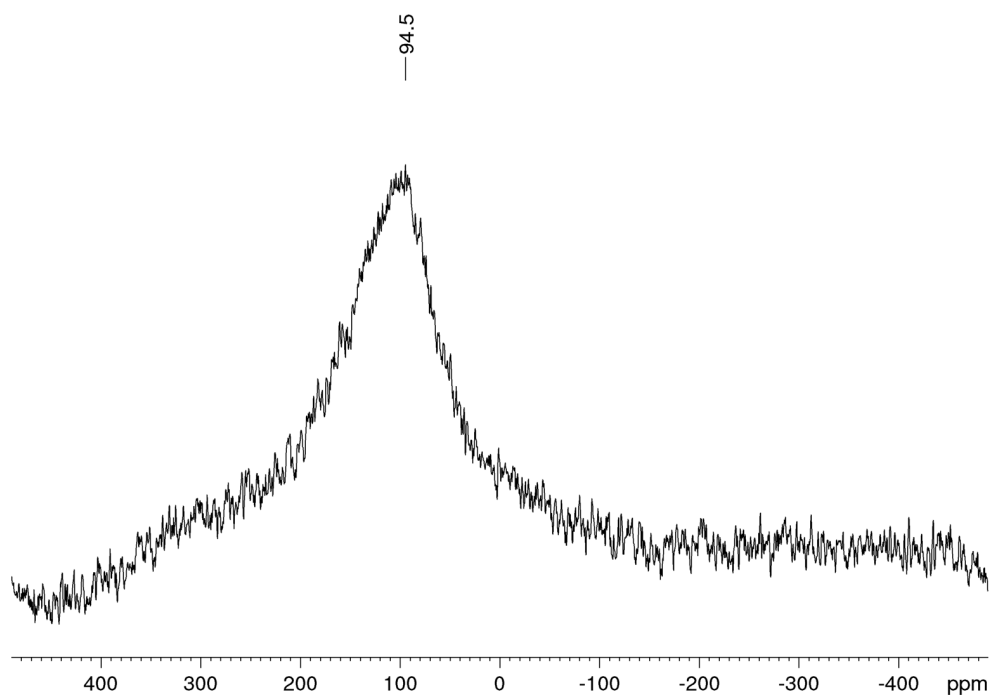

**Figure S42.**  $^{45}\text{Sc}$  NMR spectrum (122 MHz) of  $[\text{Sc}(\mu\text{-OC}_6\text{H}_3i\text{Pr}_2\text{-2,6})(\text{OC}_6\text{H}_3i\text{Pr}_2\text{-2,6})_2]_2$  (**7**) in  $[\text{D}_8]\text{toluene}$  at  $26\text{ }^\circ\text{C}$ .

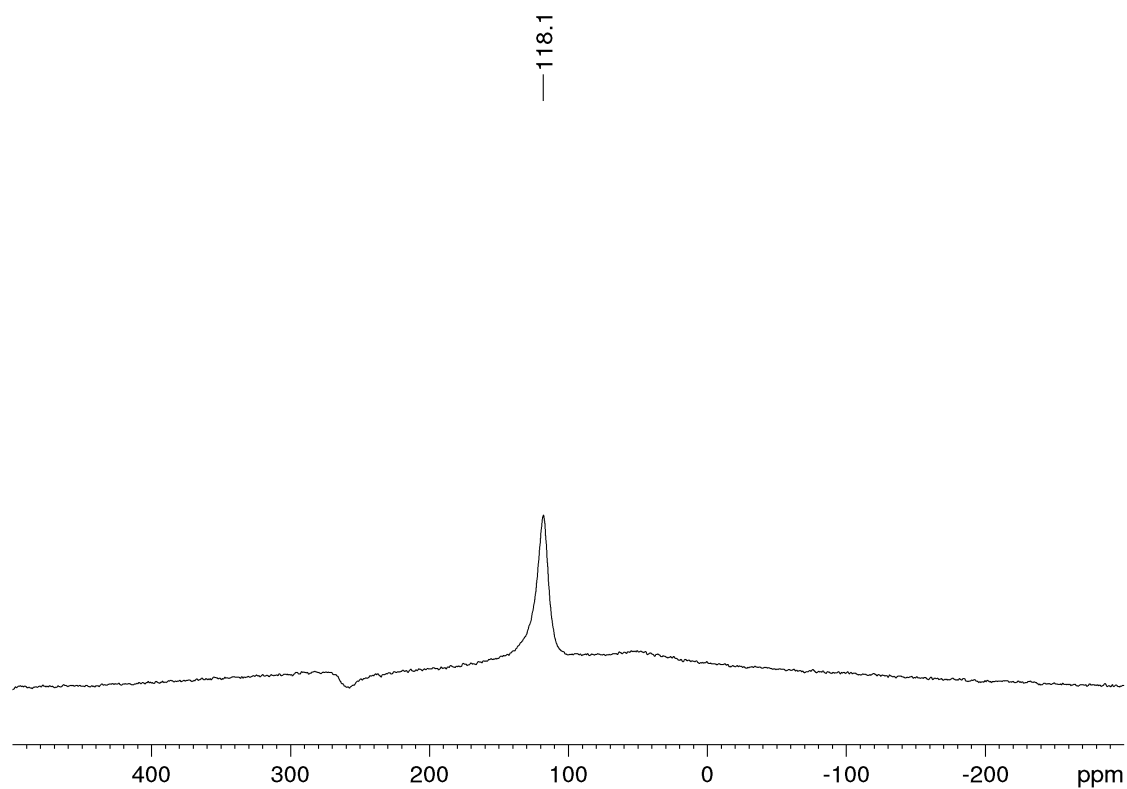

**Figure S43.**  $^{45}\text{Sc}$  NMR spectrum (122 MHz) of  $[\text{Sc}(\mu\text{-OC}_6\text{H}_3i\text{Pr}_2\text{-2,6})(\text{OC}_6\text{H}_3i\text{Pr}_2\text{-2,6})_2]_2$  (**7**) in  $[\text{D}_8]\text{THF}$  at  $26\text{ }^\circ\text{C}$ .

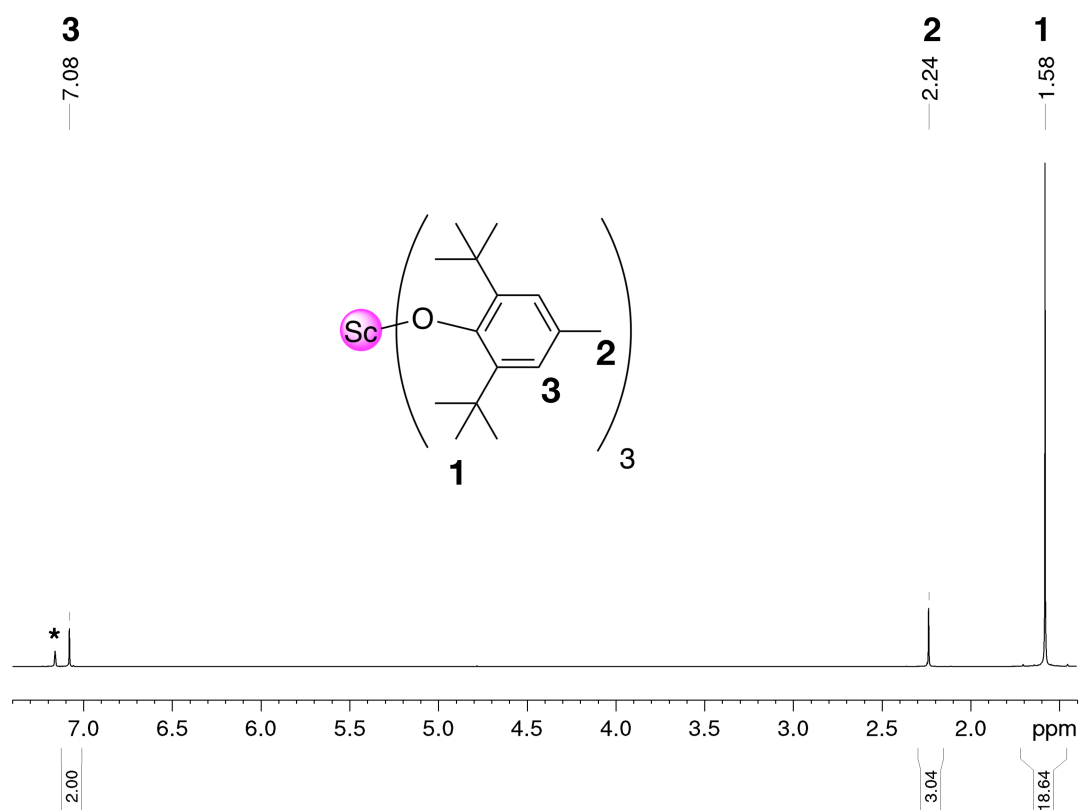

**Figure S44.**  $^1\text{H}$  NMR spectrum (500 MHz) of  $\text{Sc}(\text{OC}_6\text{H}_2\text{-}t\text{Bu}_2\text{-}2,6\text{-Me-}4)_3$  in  $\text{C}_6\text{D}_6$  at 26 °C. The solvent residual signal is marked with an asterisk.

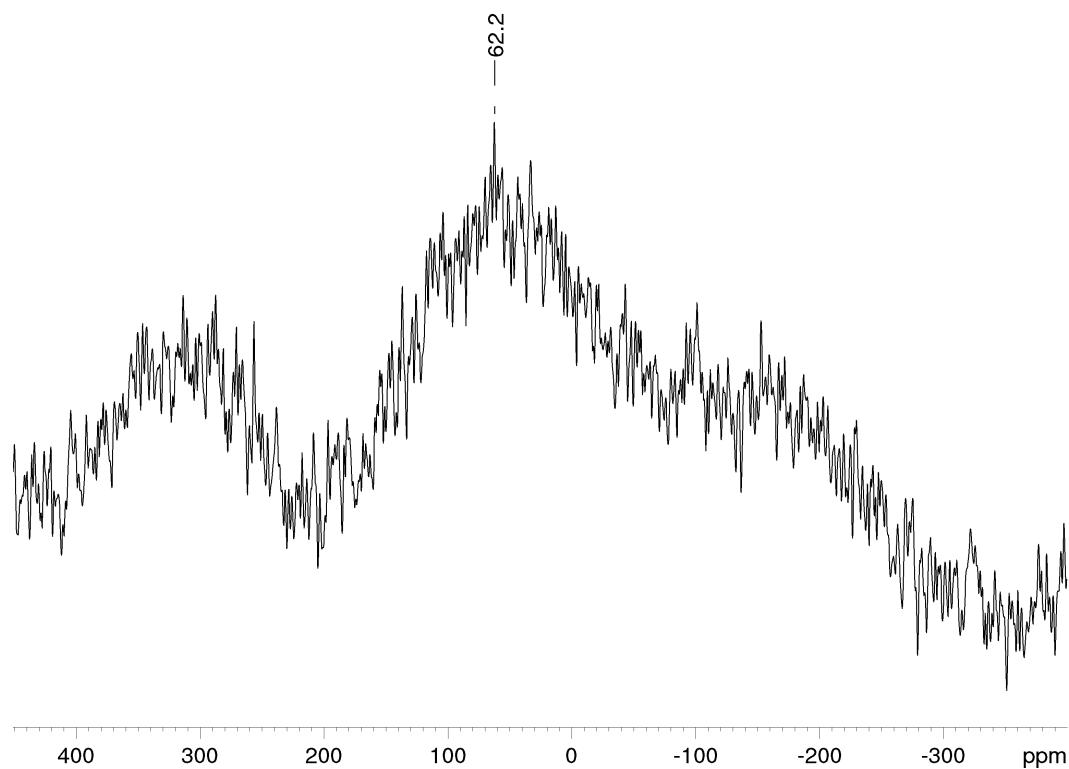

**Figure S45.**  $^{45}\text{Sc}$  NMR spectrum (122 MHz) of  $\text{Sc}(\text{OC}_6\text{H}_2\text{-}t\text{Bu}_2\text{-}2,6\text{-Me-}4)_3$  in  $\text{C}_6\text{D}_6$  at 26 °C.

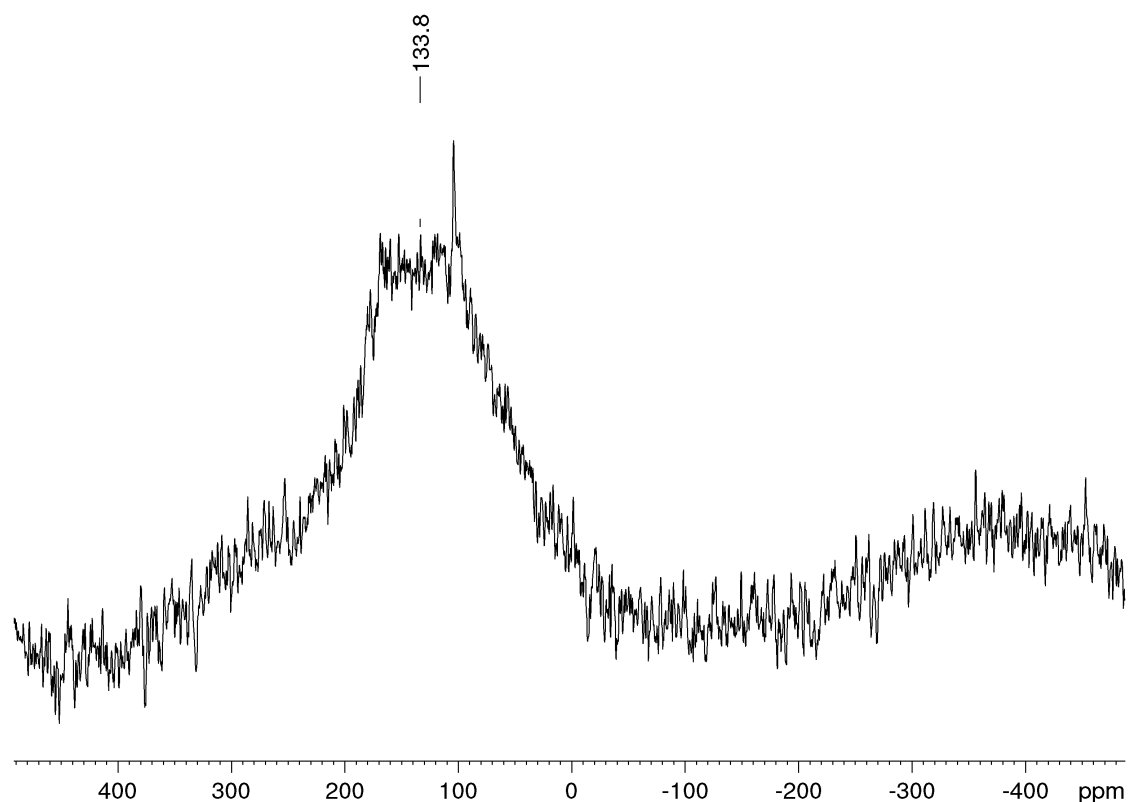

**Figure S46.**  $^{45}\text{Sc}$  NMR spectrum (122 MHz) of  $\text{Sc}(\text{OC}_6\text{H}_2\text{-}t\text{Bu}_2\text{-2,6-Me-4})_3$  in  $[\text{D}_8]\text{THF}$  at 26 °C.

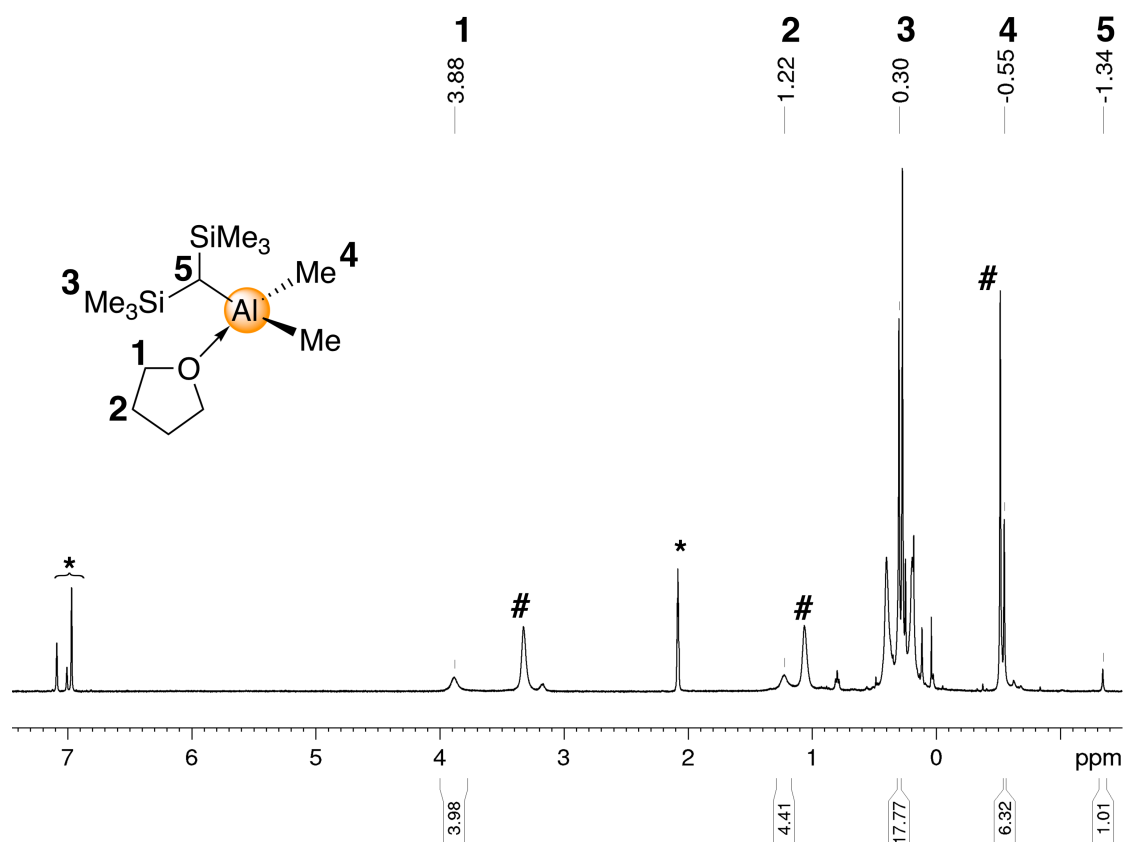

**Figure S47.**  $^1\text{H}$  NMR spectrum (500 MHz) of the reaction of complex **4** with 4 equiv.  $\text{AlMe}_3$  in  $[\text{D}_8]\text{toluene}$  at 26 °C. Signals of *in situ* formed complex **5** labelled with numbers. Presumed signals of  $\text{AlMe}_3 \cdot \text{thf}$  marked with #, the solvent residual signal is marked with an asterisk.

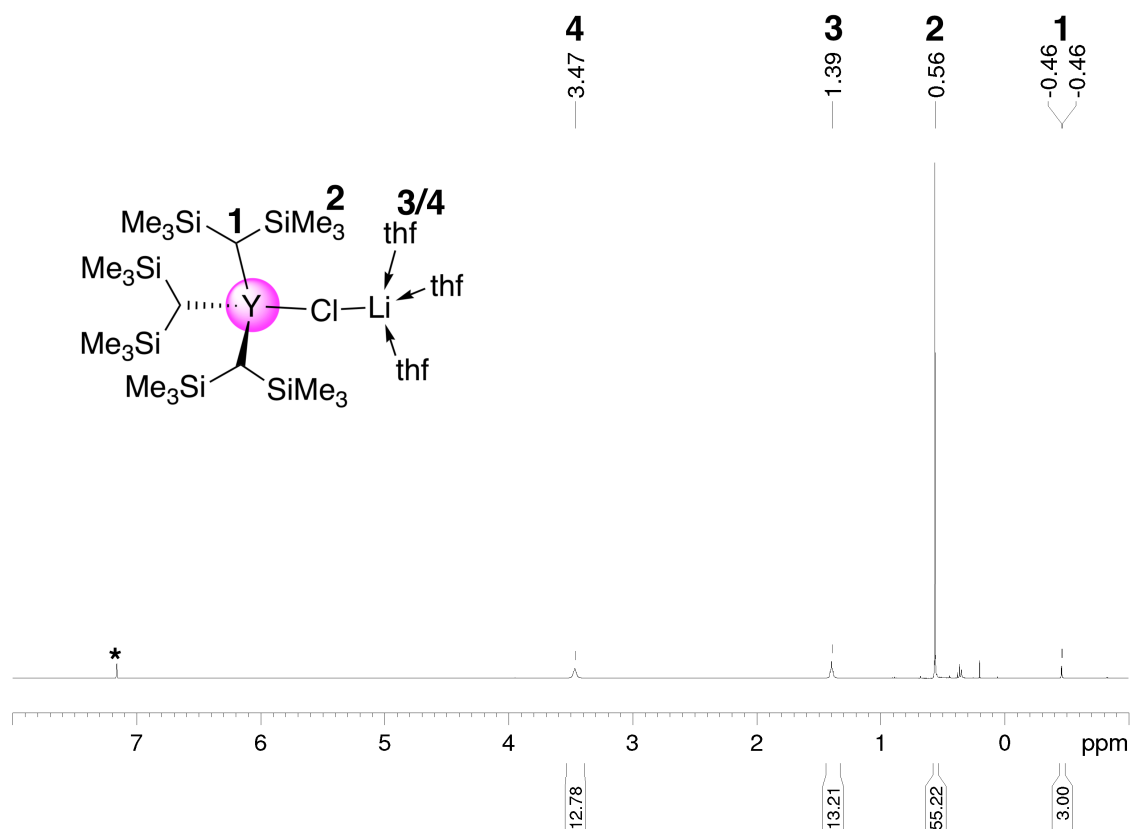

**Figure S48.**  $^1\text{H}$  NMR spectrum (500 MHz) of  $\text{Y}[\text{CH}(\text{SiMe}_3)_2]_3(\mu\text{-Cl})\text{Li}(\text{thf})_3$  (2-Y) in  $\text{C}_6\text{D}_6$  at 26 °C. The solvent residual signal is marked with an asterisk.

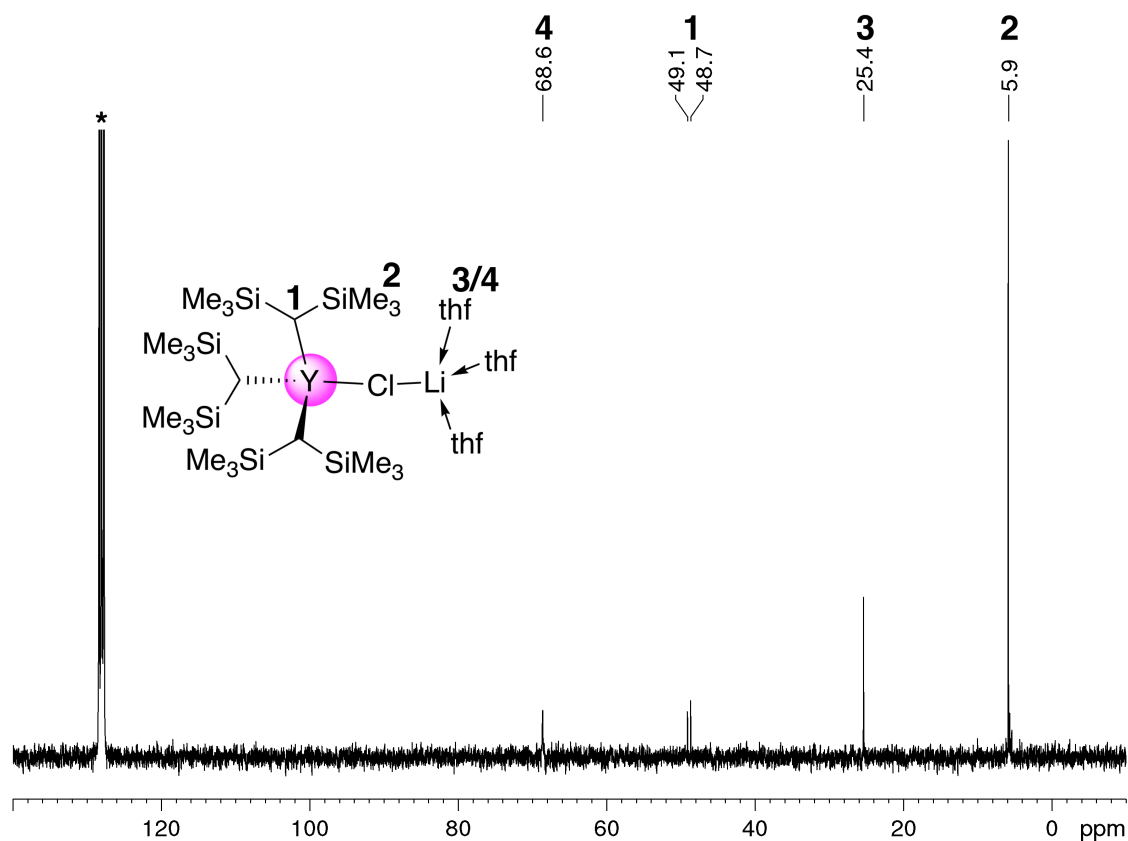

**Figure S49.**  $^{13}\text{C}\{^1\text{H}\}$  NMR spectrum (126 MHz) of  $\text{Y}[\text{CH}(\text{SiMe}_3)_2]_3(\mu\text{-Cl})\text{Li}(\text{thf})_3$  (2-Y) in  $\text{C}_6\text{D}_6$  at 26 °C. The solvent residual signal is marked with an asterisk.

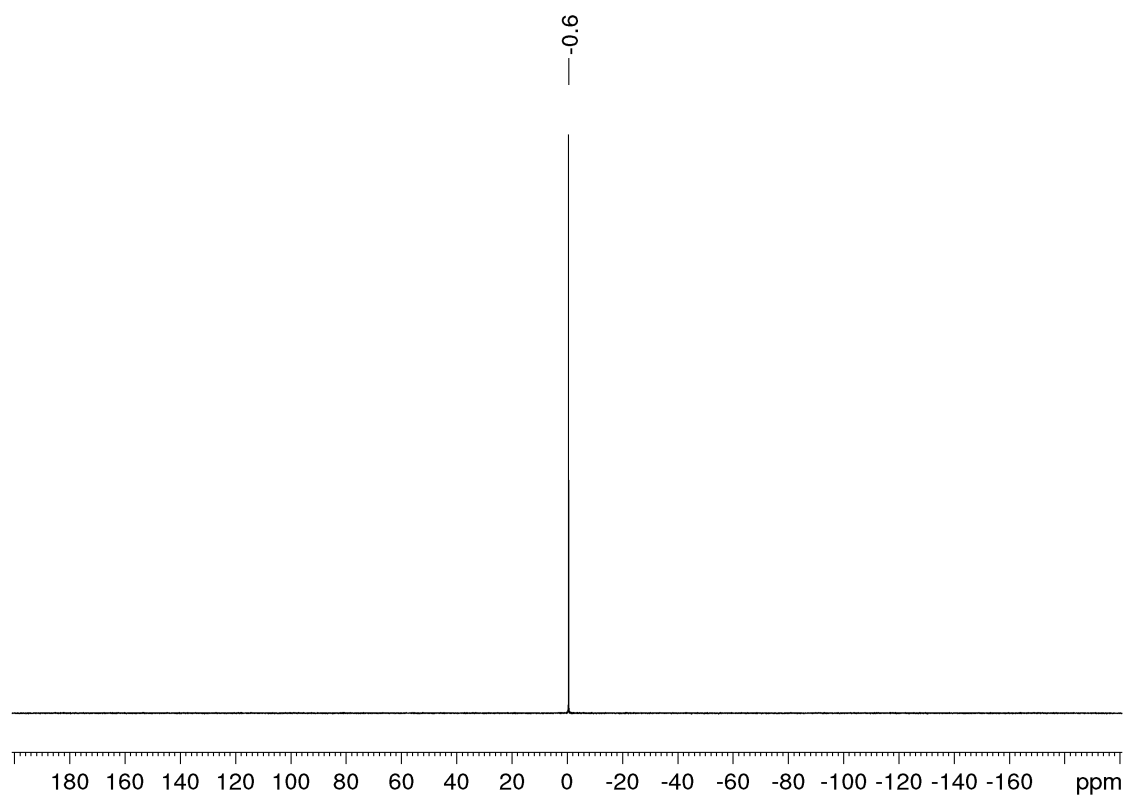

**Figure S50.**  ${}^7\text{Li}\{{}^1\text{H}\}$  NMR spectrum (194 MHz) of  $\text{Y}[\text{CH}(\text{SiMe}_3)_2]_3(\mu\text{-Cl})\text{Li}(\text{thf})_3$  (**2-Y**) in  $\text{C}_6\text{D}_6$  at 26 °C.

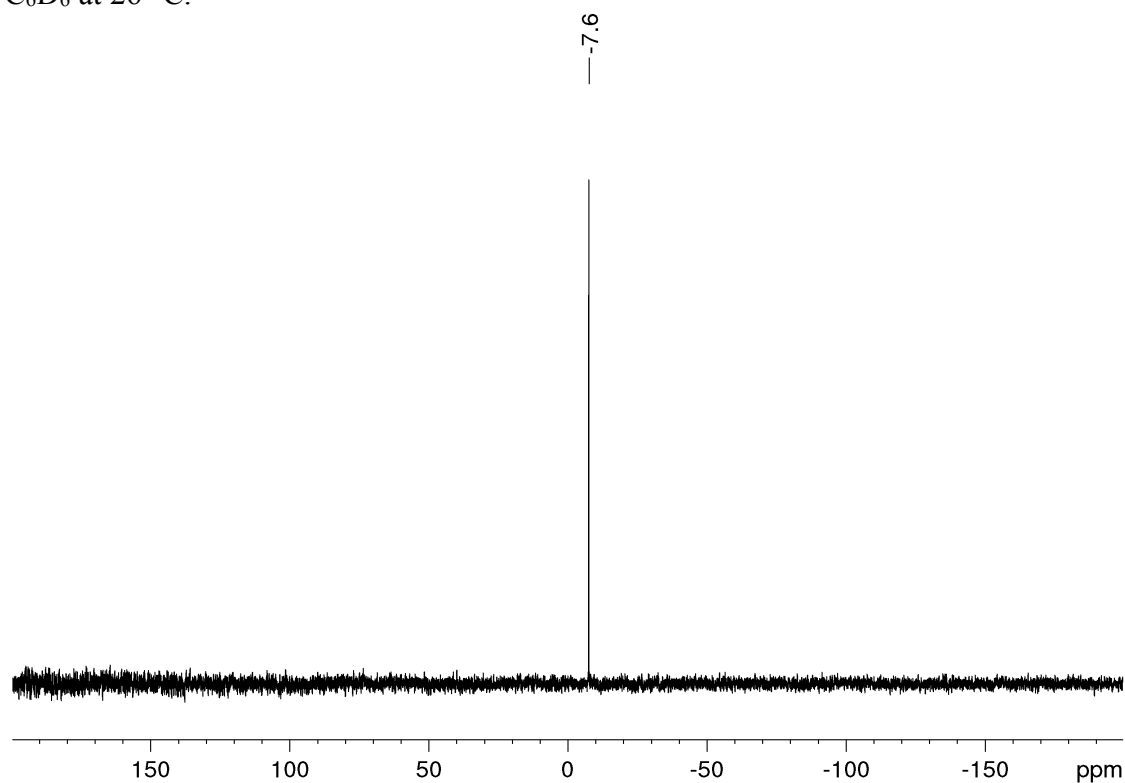

**Figure S51.**  ${}^{29}\text{Si}$  INEPT NMR spectrum (60 MHz) of  $\text{Y}[\text{CH}(\text{SiMe}_3)_2]_3(\mu\text{-Cl})\text{Li}(\text{thf})_3$  (**2-Y**) in  $\text{C}_6\text{D}_6$  at 26 °C.

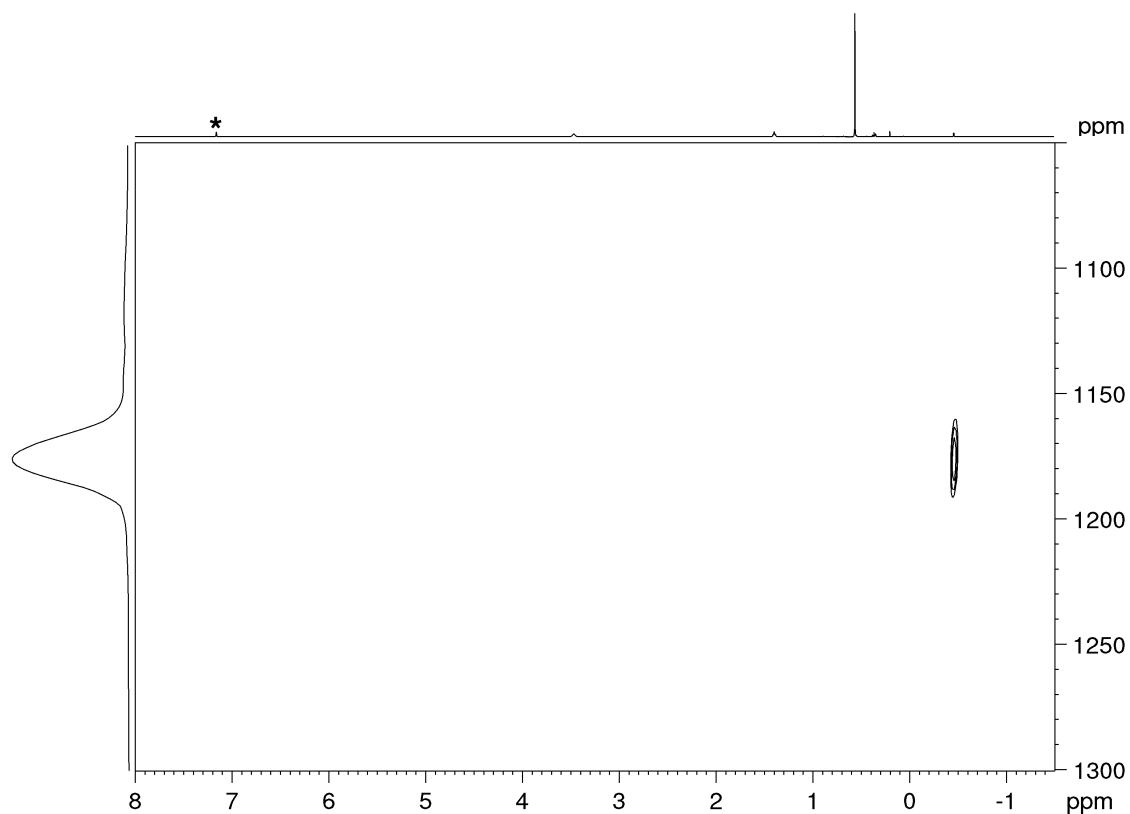

**Figure S52.**  $^1\text{H}$ - $^{89}\text{Y}$  HSQC NMR spectrum (25 MHz) of  $\text{Y}[\text{CH}(\text{SiMe}_3)_2]_3(\mu\text{-Cl})\text{Li}(\text{thf})_3$  (**2-Y**) in  $\text{C}_6\text{D}_6$  at 26 °C. The solvent residual signal is marked with an asterisk.

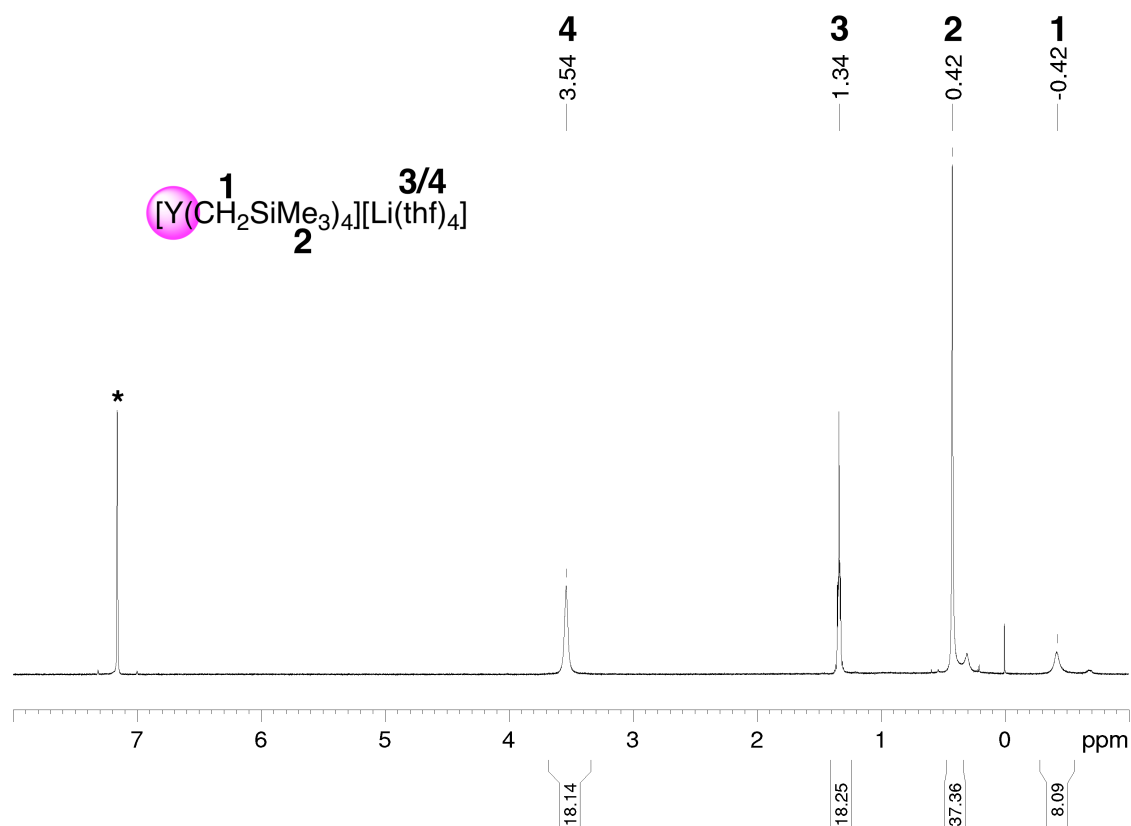

**Figure S53.**  $^1\text{H}$  NMR spectrum (500 MHz) of  $[\text{Y}(\text{CH}_2\text{SiMe}_3)_4][\text{Li}(\text{thf})_4]$  (**6-Y**) in  $\text{C}_6\text{D}_6$  at 26 °C. The solvent residual signal is marked with an asterisk.

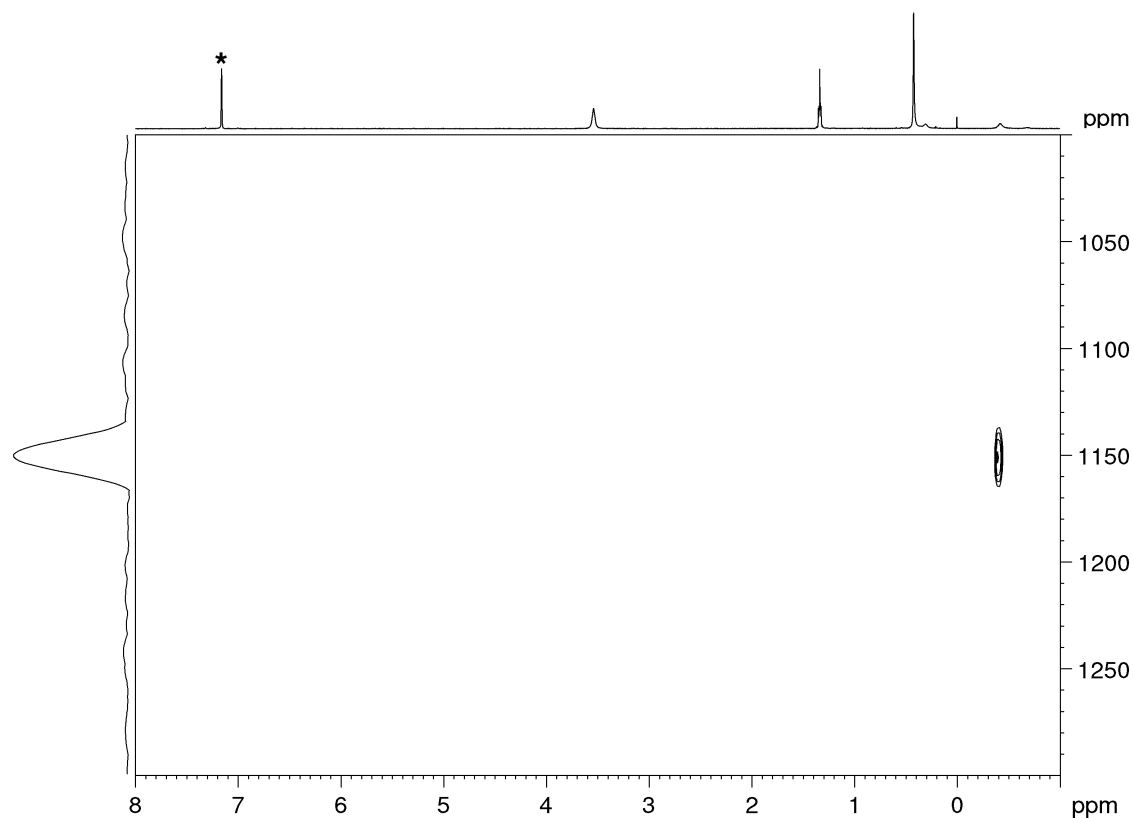

**Figure S54.**  $^1\text{H}$ - $^{89}\text{Y}$  HSQC NMR spectrum (25 MHz) of  $[\text{Y}(\text{CH}_2\text{SiMe}_3)_4][\text{Li}(\text{thf})_4]$  (**6-Y**) in  $\text{C}_6\text{D}_6$  at 26 °C. The solvent residual signal is marked with an asterisk.

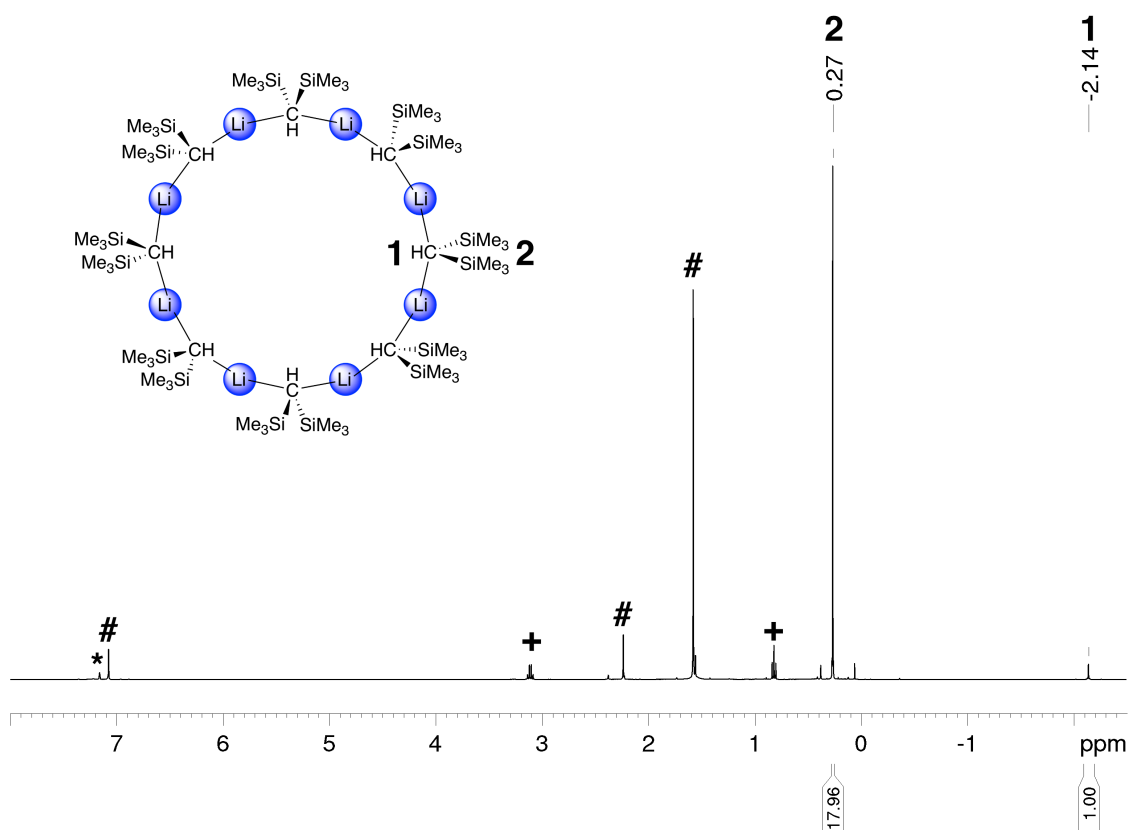

**Figure S55.**  $^1\text{H}$  NMR spectrum (400 MHz) of  $[\text{Li}\{\text{CH}(\text{SiMe}_3)_2\}]_8$  in  $\text{C}_6\text{D}_6$  at 26 °C. Residual diethyl ether is marked with a +, unreacted  $\text{Sc}(\text{OC}_6\text{H}_2\text{-}i\text{Bu}_2\text{-}2,6\text{-Me-}4)_3$  is marked with a #. The solvent residual signal is marked with an asterisk.

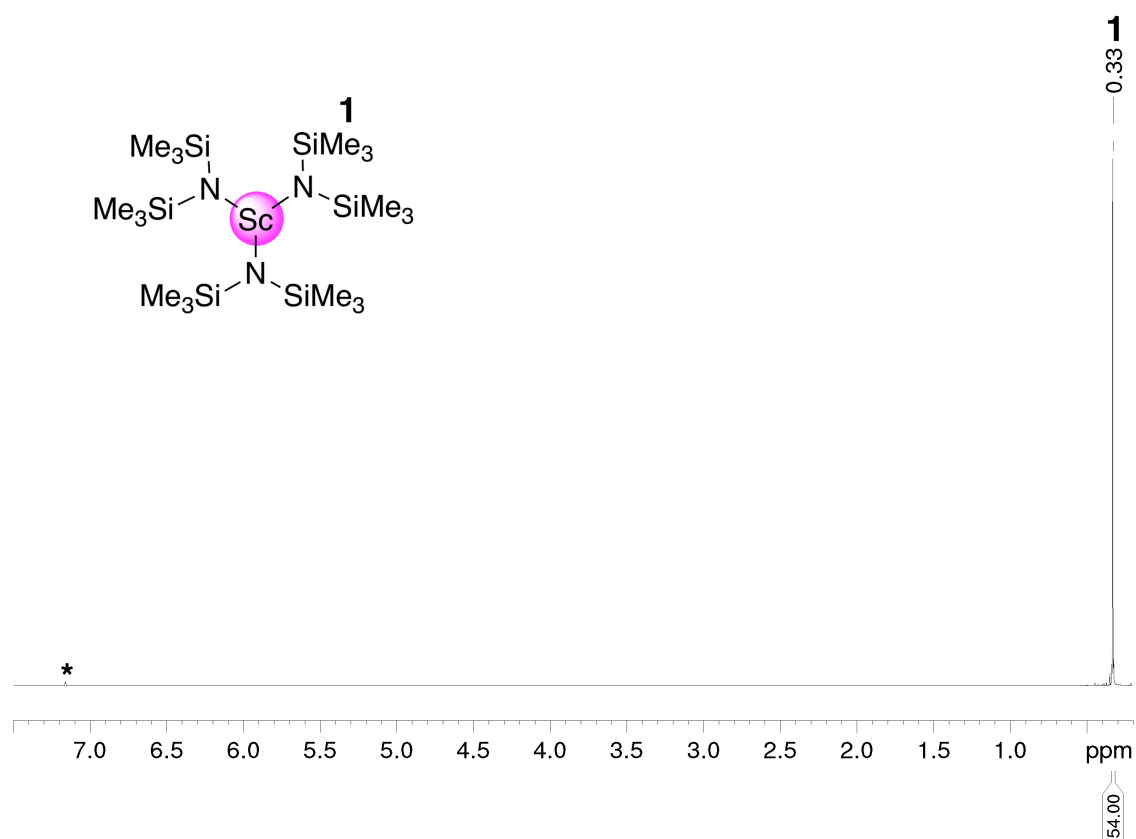

**Figure S56.**  $^1\text{H}$  NMR spectrum (500 MHz) of  $\text{Sc}[\text{N}(\text{SiMe}_3)_2]_3$  in  $\text{C}_6\text{D}_6$  at 26 °C. The solvent residual signal is marked with an asterisk.

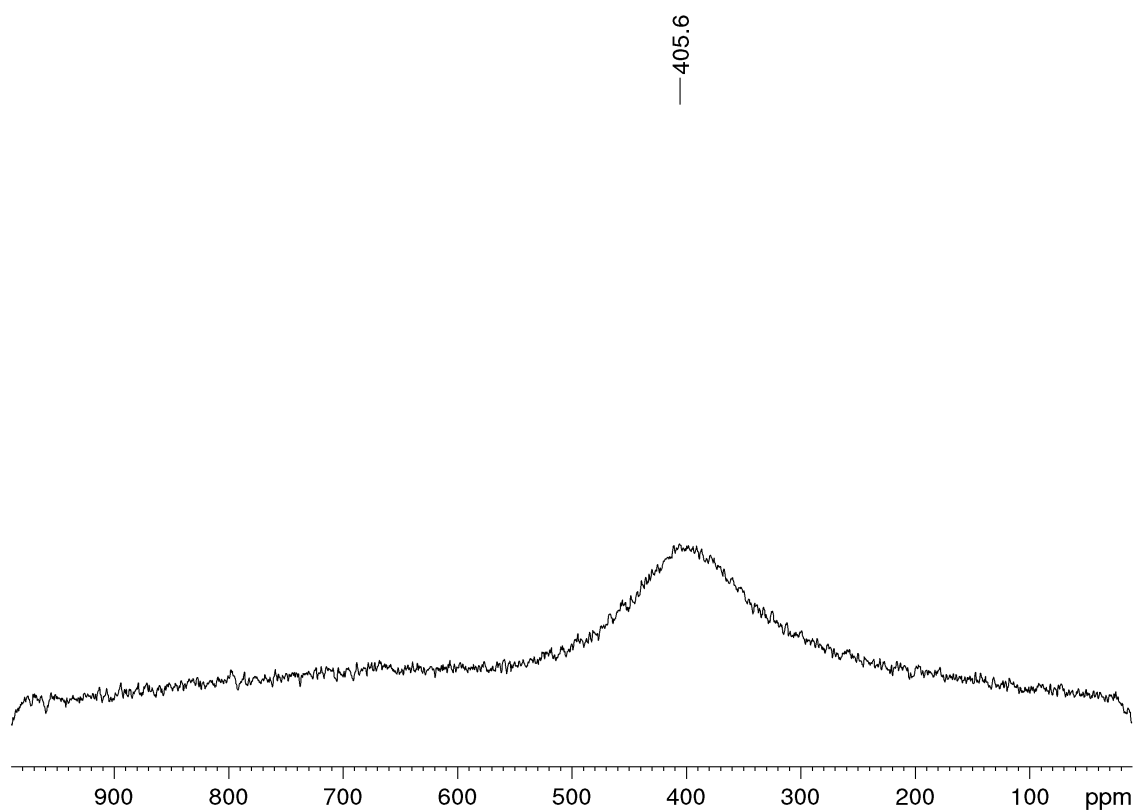

**Figure S57.**  $^{45}\text{Sc}$  NMR spectrum (122 MHz) of  $\text{Sc}[\text{N}(\text{SiMe}_3)_2]_3$  in  $\text{C}_6\text{D}_6$  at 26 °C.

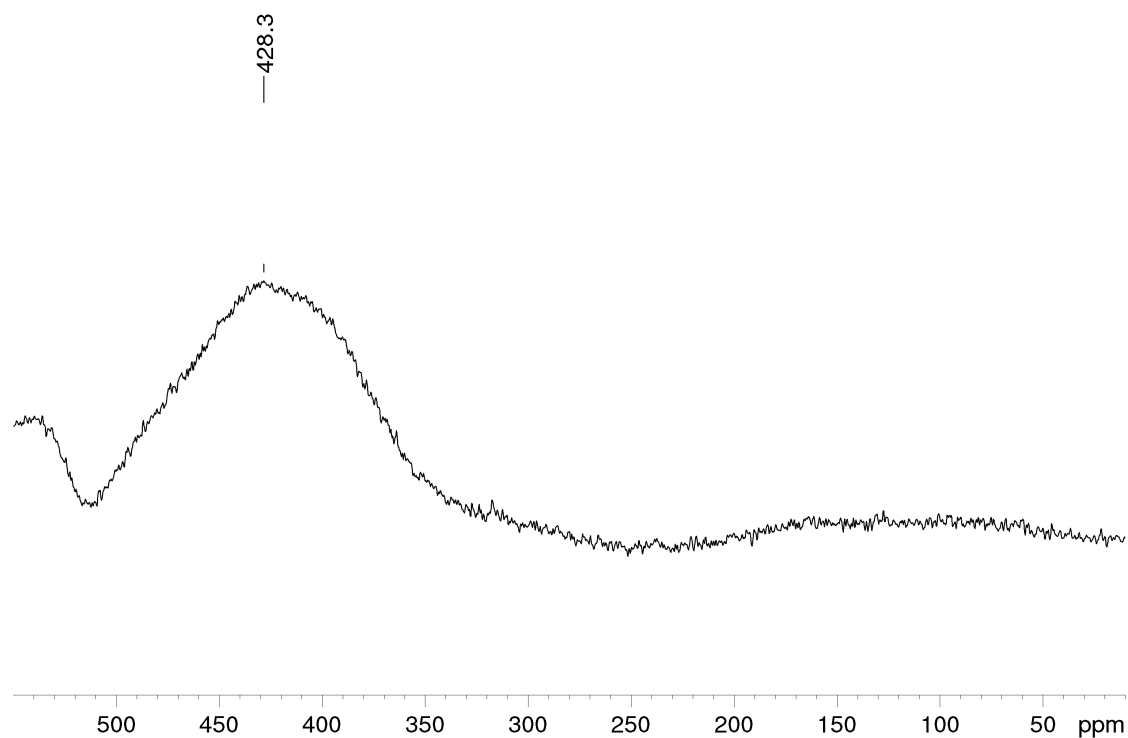

**Figure S58.**  $^{45}\text{Sc}$  NMR spectrum (122 MHz) of  $\text{Sc}[\text{N}(\text{SiMe}_3)_2]_3$  in  $[\text{D}_8]\text{THF}$  at  $26\text{ }^\circ\text{C}$ .

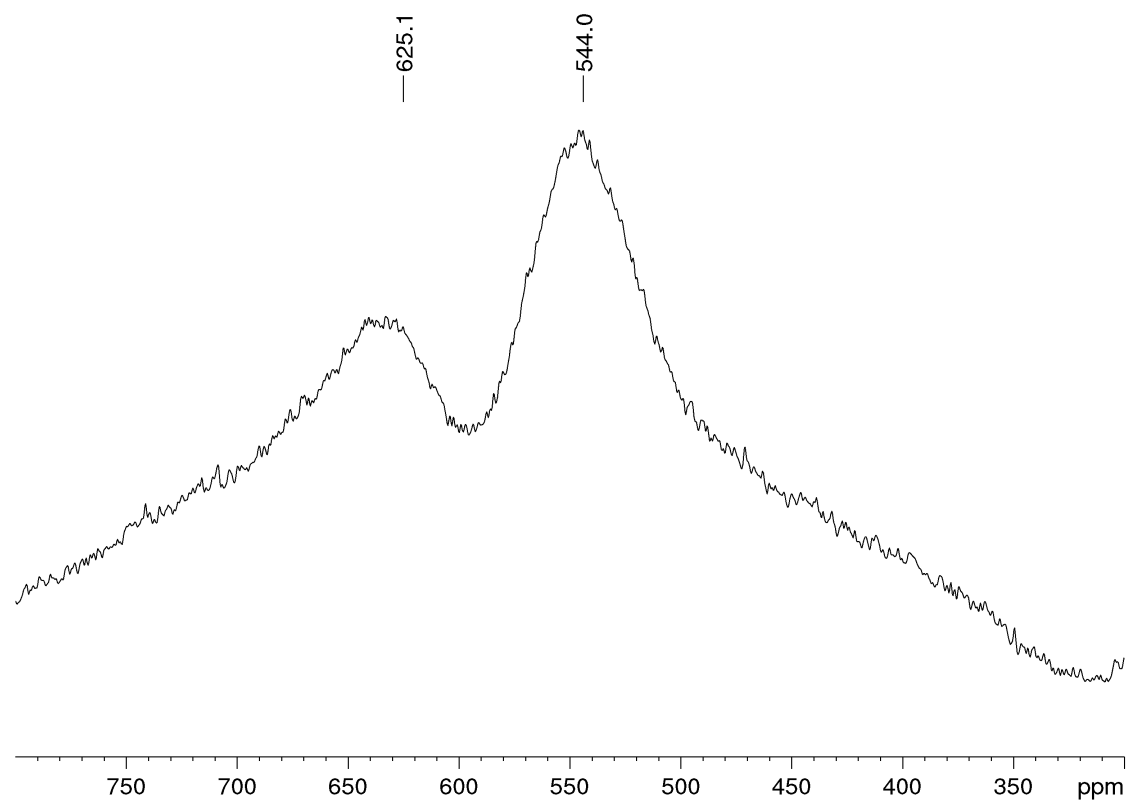

**Figure S59.**  $^{45}\text{Sc}$  NMR spectrum (122 MHz) of the reaction of  $[\text{Sc}(\mu\text{-OC}_6\text{H}_3i\text{Pr}_2\text{-2,6})(\text{OC}_6\text{H}_3i\text{Pr}_2\text{-2,6})_2]_2$  (**7**) with 3 equivalents of  $\text{Li}[\text{CH}(\text{SiMe}_3)_2]$  in  $\text{C}_6\text{D}_6$  at  $26\text{ }^\circ\text{C}$ .

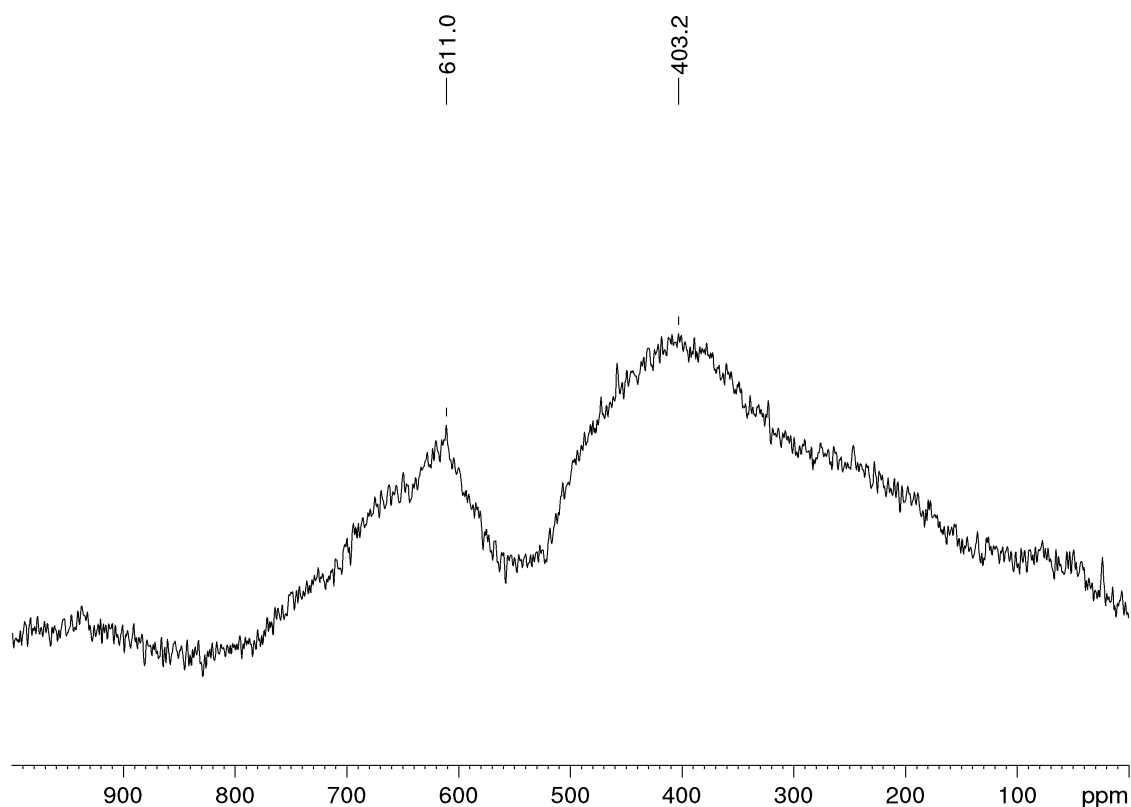

**Figure S60.**  $^{45}\text{Sc}$  NMR spectrum (122 MHz) of the reaction of  $\text{Sc}(\text{OC}_6\text{H}_2\text{-}i\text{Bu}_2\text{-}2,6\text{-Me-}4)_3$  with 3 equivalents of  $\text{Li}[\text{CH}(\text{SiMe}_3)_2]$  after heating for 18 h to 40 °C in  $\text{C}_6\text{D}_6$  at 26 °C.

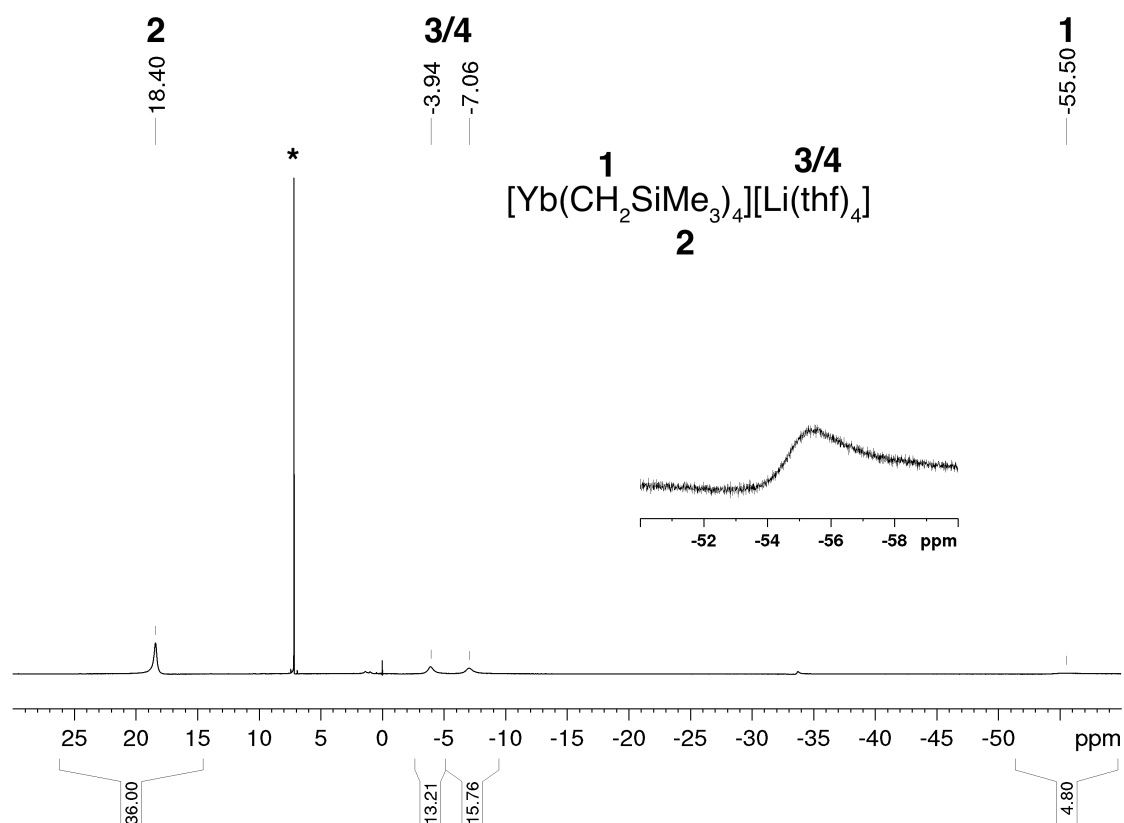

**Figure S61.**  $^1\text{H}$  NMR spectrum (400 MHz) of  $[\text{Yb}(\text{CH}_2\text{SiMe}_3)_4][\text{Li}(\text{thf})_4]$  (6-Yb) in  $\text{C}_6\text{D}_6$  at 26 °C. Solvent residual peak is marked with an asterisk.

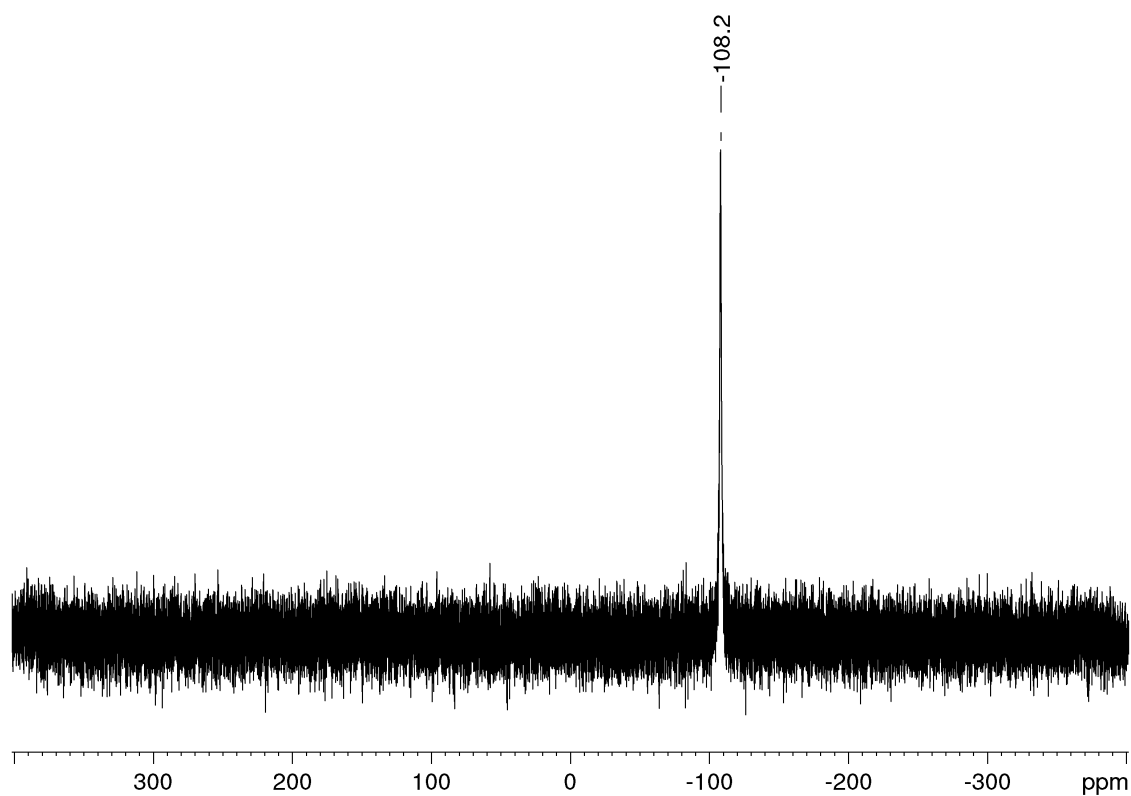

**Figure S62.**  $^7\text{Li}$  NMR spectrum (117 MHz) of  $[\text{Yb}(\text{CH}_2\text{SiMe}_3)_4][\text{Li}(\text{thf})_4]$  (**6-Yb**) in  $\text{C}_6\text{D}_6$  at 26 °C. Solvent residual peak is marked with an asterisk.

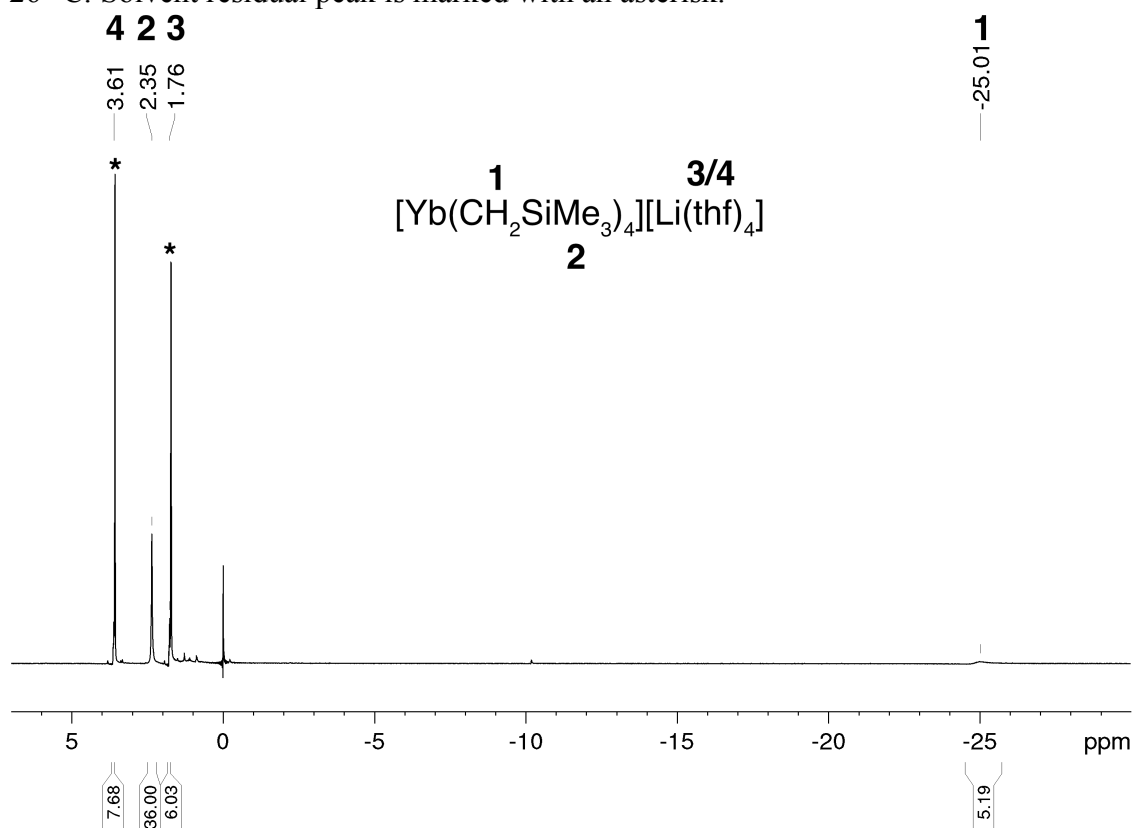

**Figure S63.**  $^1\text{H}$  NMR spectrum (400 MHz) of  $[\text{Yb}(\text{CH}_2\text{SiMe}_3)_4][\text{Li}(\text{thf})_4]$  (**6-Yb**) in  $[\text{D}_8]\text{THF}$  at 26 °C. Solvent residual peaks are marked with asterisks.

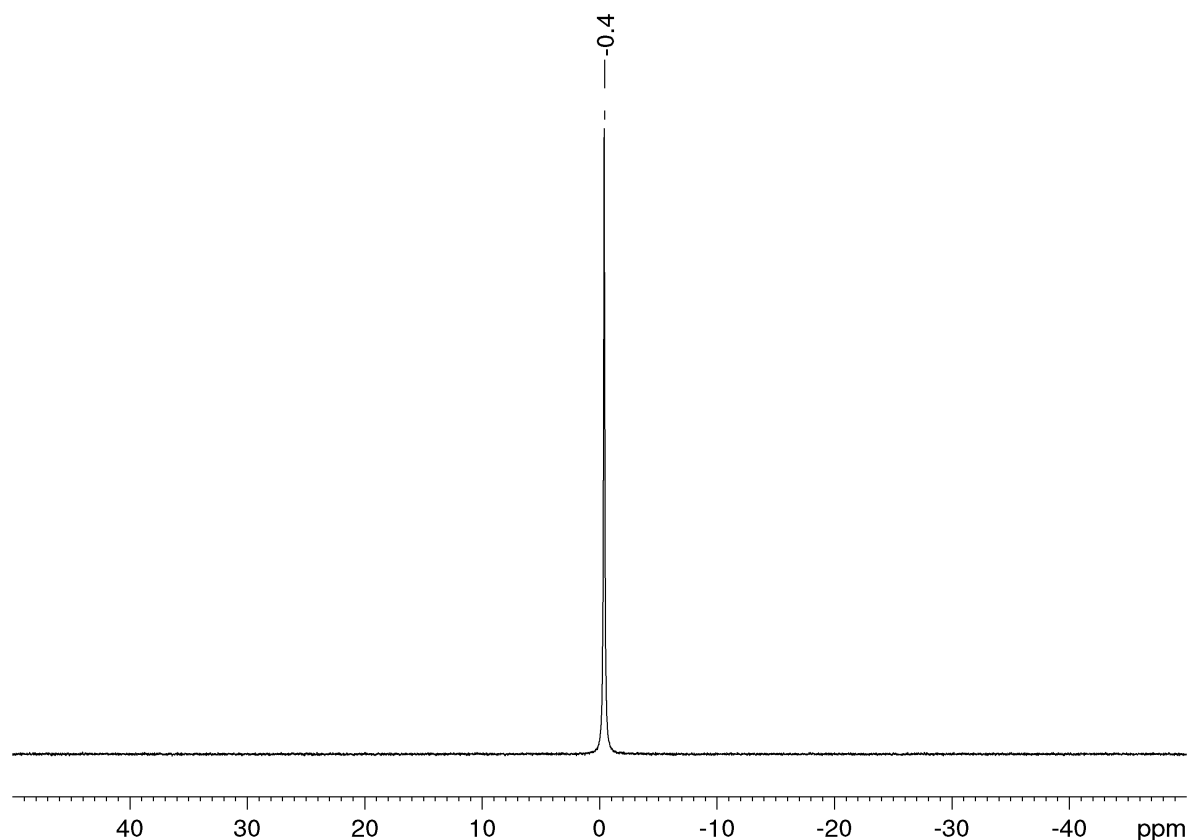

**Figure S64.**  $^7\text{Li}$  NMR spectrum (117 MHz) of  $[\text{Yb}(\text{CH}_2\text{SiMe}_3)_4][\text{Li}(\text{thf})_4]$  (**6-Yb**) in  $[\text{D}_8]\text{THF}$  at 26 °C.

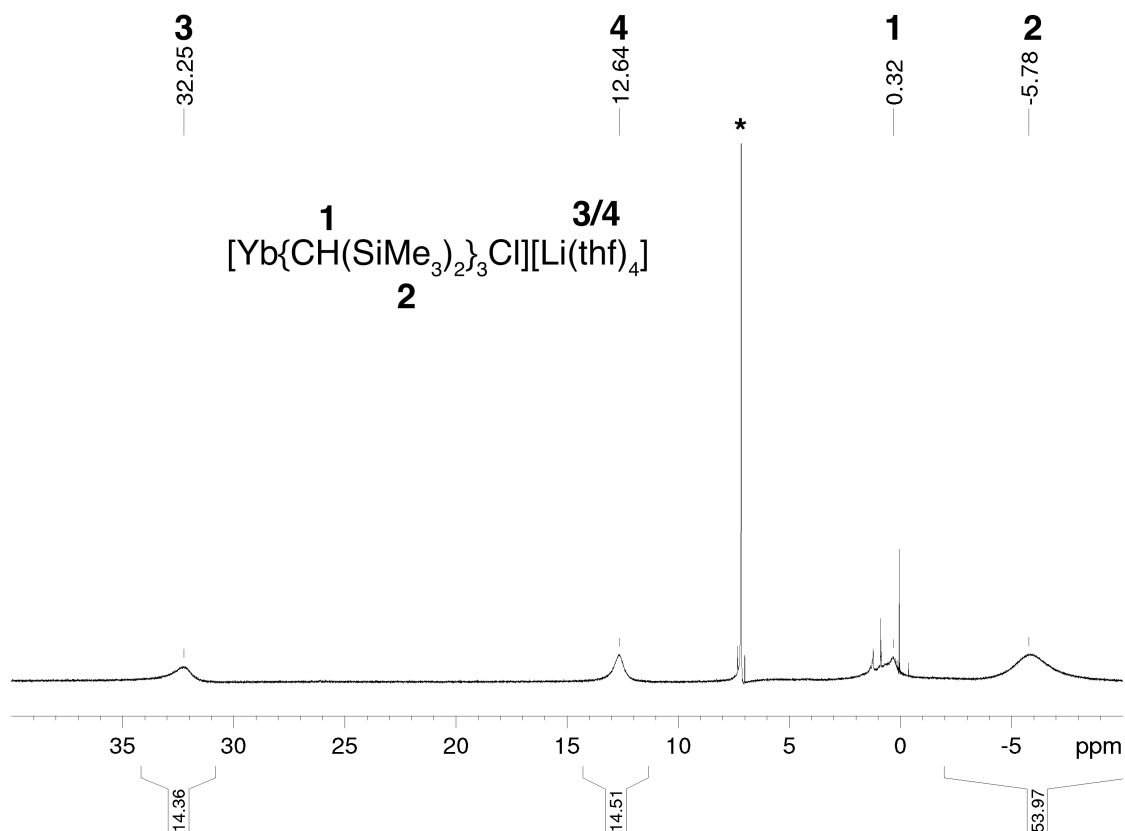

**Figure S65.**  $^1\text{H}$  NMR spectrum (500 MHz) of  $[\text{Yb}\{\text{CH}(\text{SiMe}_3)_2\}_3\text{Cl}][\text{Li}(\text{thf})_4]$  in  $\text{C}_6\text{D}_6$  at 26 °C. Solvent residual peak is marked with an asterisk.

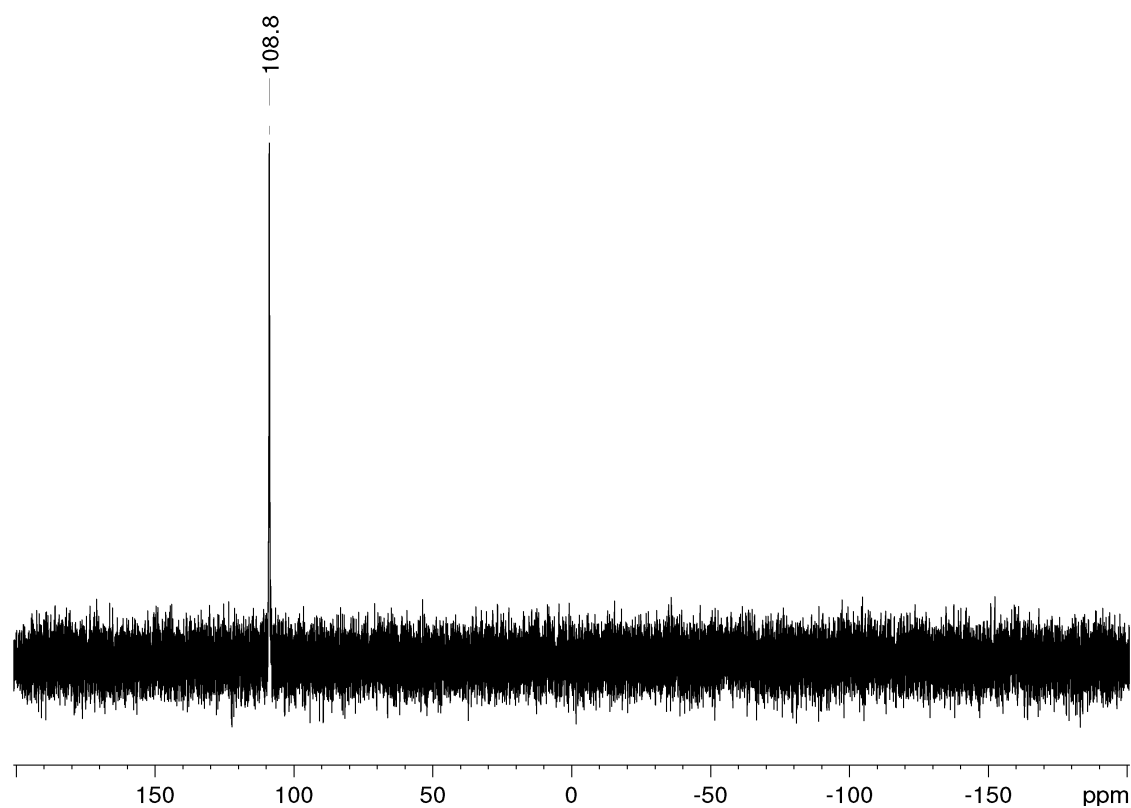

**Figure S66.**  $^7\text{Li}$  NMR spectrum (194.4 MHz) of  $[\text{Yb}\{\text{CH}(\text{SiMe}_3)_2\}_3\text{Cl}][\text{Li}(\text{thf})_4]$  in  $\text{C}_6\text{D}_6$  at 26 °C.

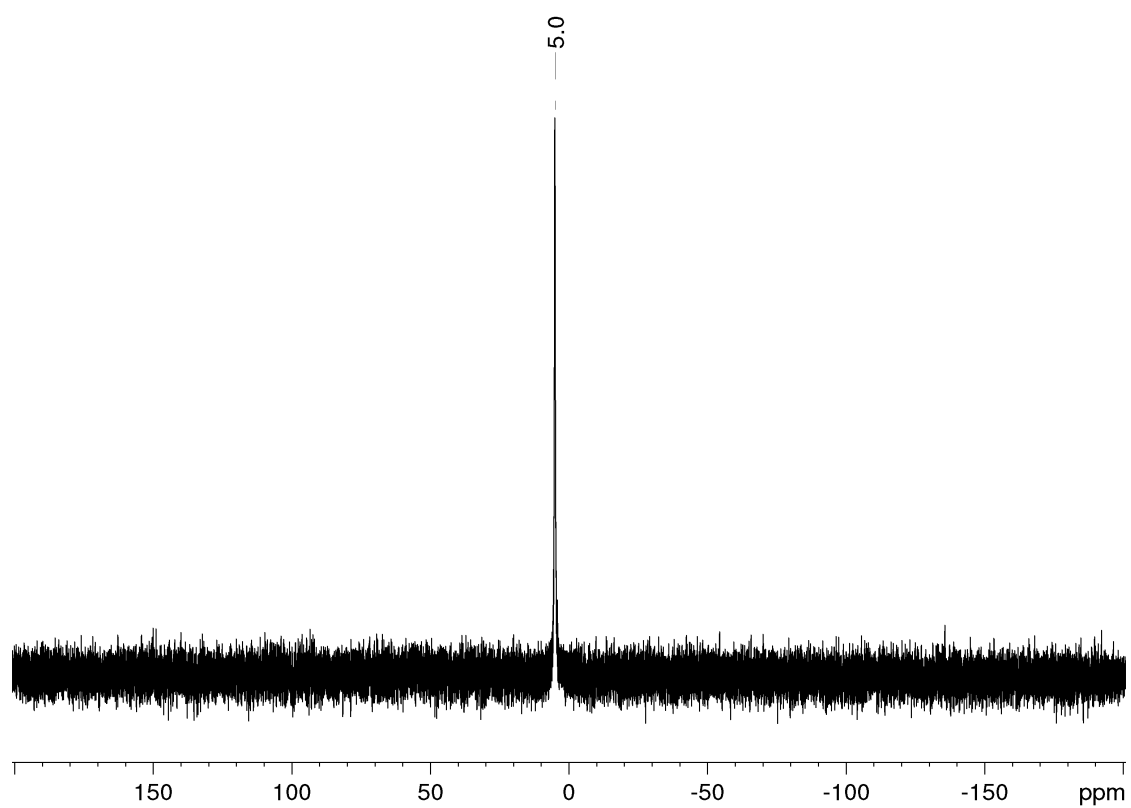

**Figure S67.**  $^7\text{Li}$  NMR spectrum (194.4 MHz) of  $[\text{Yb}\{\text{CH}(\text{SiMe}_3)_2\}_3\text{Cl}][\text{Li}(\text{thf})_4]$  in  $[\text{D}_8]\text{THF}$  at 26 °C.

# X-Ray Crystallography

**Table S1. Crystallographic Data for Compounds 1, 2-Sc, 3, 4, 5 and 7**

|                                          | 1                                                                                                               | 2-Sc                                                                 | 3                                                                                               | 4                                                                  | 5                                                  | 7                                                               |
|------------------------------------------|-----------------------------------------------------------------------------------------------------------------|----------------------------------------------------------------------|-------------------------------------------------------------------------------------------------|--------------------------------------------------------------------|----------------------------------------------------|-----------------------------------------------------------------|
| formula                                  | C <sub>44</sub> H <sub>108</sub> Cl <sub>4</sub> Li <sub>2</sub> O <sub>4</sub> Sc <sub>2</sub> Si <sub>8</sub> | C <sub>33</sub> H <sub>81</sub> ClLiO <sub>3</sub> ScSi <sub>6</sub> | C <sub>48</sub> H <sub>120</sub> Li <sub>2</sub> O <sub>4</sub> Sc <sub>2</sub> Si <sub>8</sub> | C <sub>34</sub> H <sub>84</sub> LiO <sub>3</sub> ScSi <sub>6</sub> | C <sub>13</sub> H <sub>33</sub> AlOSi <sub>2</sub> | C <sub>79</sub> H <sub>110</sub> O <sub>6</sub> Sc <sub>2</sub> |
| CCDC                                     | 1567519                                                                                                         | 1990653                                                              | 1567518                                                                                         | 1990652                                                            | 1567517                                            | 1993137                                                         |
| M <sub>r</sub> [g mol <sup>-1</sup> ]    | 1171.62                                                                                                         | 781.86                                                               | 1089.96                                                                                         | 761.45                                                             | 288.55                                             | 1245.58                                                         |
| color                                    | colourless/block                                                                                                | colourless/block                                                     | colourless/plate                                                                                | colourless/needle                                                  | colourless/column                                  | colourless/block                                                |
| crystal dimensions [mm]                  | 0.269 x 0.153 x 0.125                                                                                           | 0.285 x 0.153 x 0.134                                                | 0.281 x 0.119 x 0.097                                                                           | 0.277 x 0.099 x 0.039                                              | 0.252 x 0.144 x 0.140                              | 0.308 x 0.194 x 0.132                                           |
| cryst syst                               | triclinic                                                                                                       | triclinic <sup>a</sup>                                               | monoclinic                                                                                      | monoclinic                                                         | monoclinic                                         | triclinic                                                       |
| space group                              | P $\bar{1}$                                                                                                     | P $\bar{1}$                                                          | P2 <sub>1</sub> /c                                                                              | C2/c                                                               | P2 <sub>1</sub> /n                                 | P $\bar{1}$                                                     |
| a [Å]                                    | 11.7206(6)                                                                                                      | 11.9397(19)                                                          | 13.3428(3)                                                                                      | 23.659(4)                                                          | 16.5825(1)                                         | 12.3059(9)                                                      |
| b [Å]                                    | 15.8089(9)                                                                                                      | 12.830(2)                                                            | 17.6787(4)                                                                                      | 12.098(2)                                                          | 7.2695(5)                                          | 13.2573(9)                                                      |
| c [Å]                                    | 19.1136(10)                                                                                                     | 17.909(3)                                                            | 18.8050(4)                                                                                      | 34.338(6)                                                          | 16.6064(1)                                         | 13.4567(10)                                                     |
| α [°]                                    | 84.989(3)                                                                                                       | 96.181(2)                                                            | 90                                                                                              | 90                                                                 | 90                                                 | 117.844(2)                                                      |
| β [°]                                    | 89.272(3)                                                                                                       | 90.239(2)                                                            | 125.5710(10)                                                                                    | 98.579(4)                                                          | 109.6080(10)                                       | 103.659(2)                                                      |
| γ [°]                                    | 79.970(3)                                                                                                       | 116.570(2)                                                           | 90                                                                                              | 90                                                                 | 90                                                 | 101.026(2)                                                      |
| V [Å <sup>3</sup> ]                      | 3474.1(3)                                                                                                       | 2435.7                                                               | 3608.05(14)                                                                                     | 9718(3)                                                            | 1885.8(2)                                          | 1766.3(2)                                                       |
| Z                                        | 2                                                                                                               | 2                                                                    | 2                                                                                               | 8                                                                  | 4                                                  | 1                                                               |
| T [K]                                    | 100(2)                                                                                                          | 100(2)                                                               | 100(2)                                                                                          | 100(2)                                                             | 102(2)                                             | 173(2)                                                          |
| ρ <sub>calcd</sub> [g cm <sup>-3</sup> ] | 1.120                                                                                                           | 1.066                                                                | 1.003                                                                                           | 1.041                                                              | 1.016                                              | 1.171                                                           |
| μ [mm <sup>-1</sup> ]                    | 0.519                                                                                                           | 0.380                                                                | 0.353                                                                                           | 0.326                                                              | 0.223                                              | 0.243                                                           |
| F (000)                                  | 1264                                                                                                            | 856                                                                  | 1200                                                                                            | 3360                                                               | 640                                                | 674                                                             |
| θ range [°]                              | 1.620/26.372                                                                                                    | 2.169/27.095                                                         | 1.760/27.106                                                                                    | 1.199/26.485                                                       | 2.129/27.877                                       | 2.049/30.598                                                    |
| unique reflns                            | 14079                                                                                                           | 10683                                                                | 7942                                                                                            | 10010                                                              | 4483                                               | 10821                                                           |
| observed reflns (I > 2σ)                 | 9444                                                                                                            | 7880                                                                 | 6003                                                                                            | 6218                                                               | 3642                                               | 9130                                                            |
| R1/wR2 (I > 2σ) <sup>[b]</sup>           | 0.0447/0.0851                                                                                                   | 0.0698/0.1995                                                        | 0.0481/0.1261                                                                                   | 0.0561/0.1169                                                      | 0.0347/0.0819                                      | 0.0395/0.1021                                                   |
| R1/wR2 (all data) <sup>[b]</sup>         | 0.0874/0.0973                                                                                                   | 0.0892/0.2148                                                        | 0.0694/0.1406                                                                                   | 0.1077/0.1380                                                      | 0.0485/0.0882                                      | 0.0487/0.1091                                                   |
| GOF <sup>[b]</sup>                       | 1.007                                                                                                           | 1.070                                                                | 1.026                                                                                           | 0.1018                                                             | 1.050                                              | 1.042                                                           |

[a] Second modification: monoclinic cell constants for **2-Sc**: a = 12.3944(9) Å,  
b = 24.8764(19) Å,  
c = 16.8800(12) Å,  
β = 96.255(1)°  
V = 4867.1 Å<sup>3</sup>

[b] R1 = Σ(|F<sub>0</sub>| - |F<sub>c</sub>|) / Σ|F<sub>0</sub>|, F<sub>0</sub> > 4σ(F<sub>0</sub>). wR2 = {Σ[w(F<sub>0</sub><sup>2</sup> - F<sub>c</sub><sup>2</sup>)<sup>2</sup> / Σ[w(F<sub>0</sub><sup>2</sup>)<sup>2</sup>]}<sup>1/2</sup>.

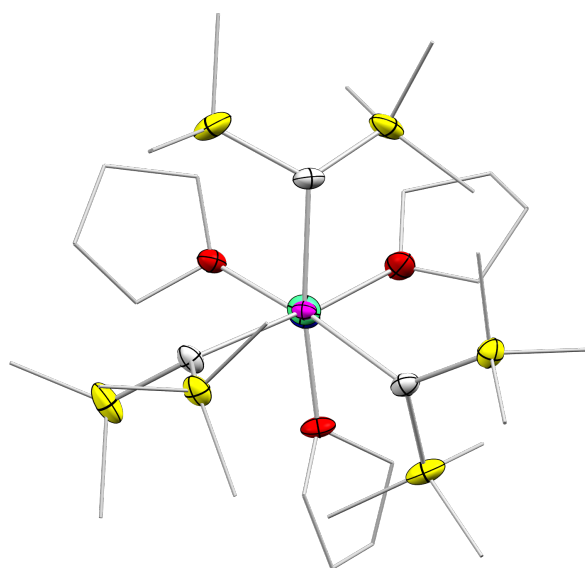

**Figure S68.** View of the crystal structure of complex **2-Sc** along its Sc–Cl–Li axis.
